# Supplementary material for: Modifications at K31 on the lateral surface of histone H4 contribute to genome structure and expression in apicomplexan parasites
Source: eLife journal article supplement (doi:10.7554/elife.29391), 2017-11-03
Supplement: supp [file elife-29391-supp-v1.zip]

TGME49\_chrla:462,421-508,192

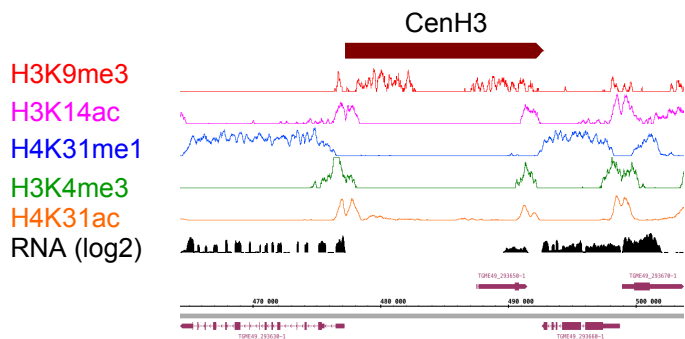

TGME49\_chrlb:261,379-329,667

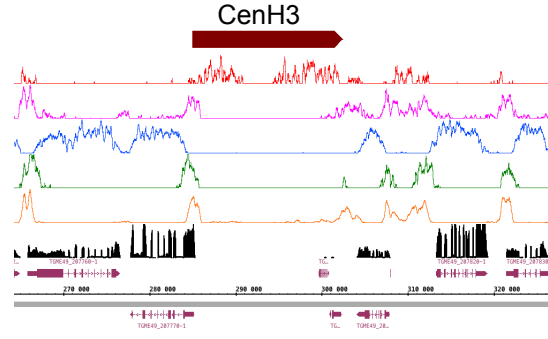

TGME49\_chrII:1,454,969-1,506,206

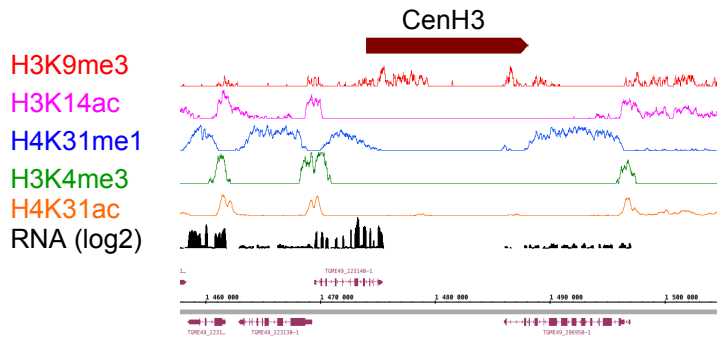

TGME49\_chrIII:405,000-484,132

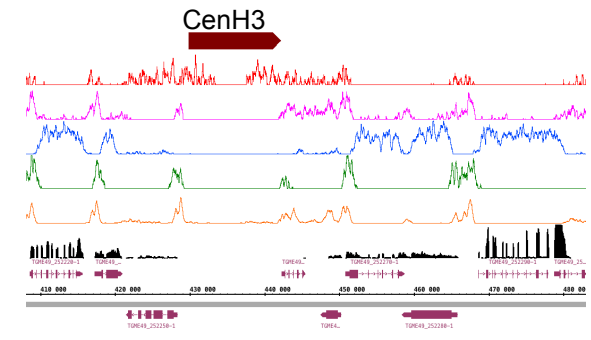

TGME49\_chrVI:2,034,000-2,142,325

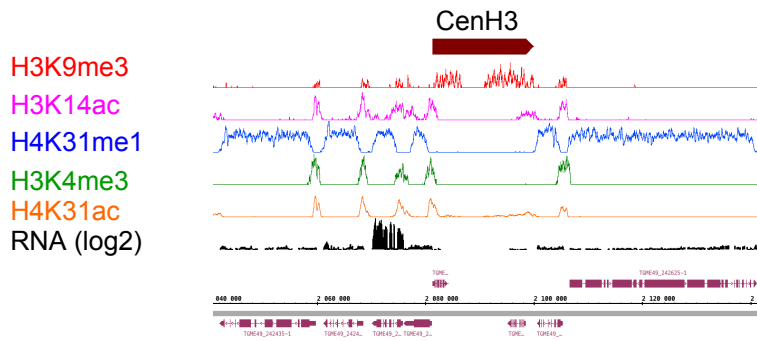

TGME49\_chrVIIa:3,389,916-3,445,691

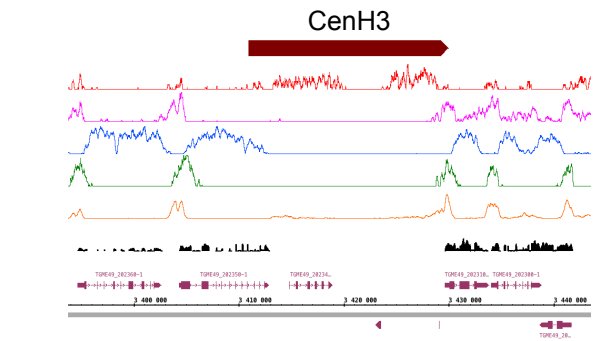

TGME49\_chrVIII:845,681-954,681

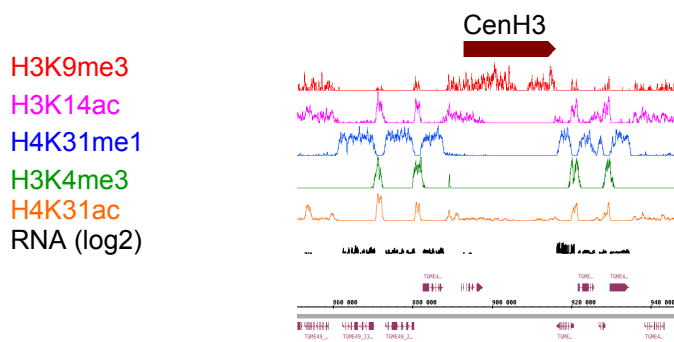

TGME49\_chrIX:5,030,000-5,090,499

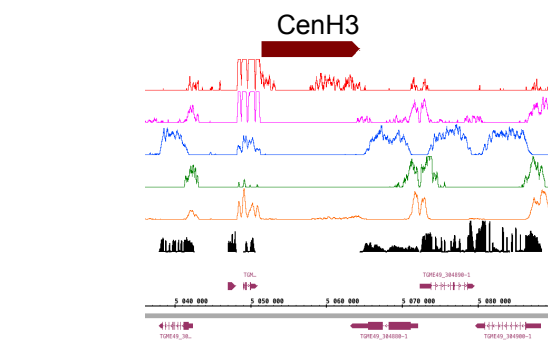

Figure 10 – figure supplement 4
