# Supplementary material for: Modifications at K31 on the lateral surface of histone H4 contribute to genome structure and expression in apicomplexan parasites
Source: eLife journal article supplement (doi:10.7554/elife.29391), 2017-11-03
Supplement: supp [file elife-29391-supp-v2.zip]

Archive with 20 entries (20 files):
- elife_poa_e29391_Figure_10_figure_supplement_3.pdf
- elife_poa_e29391_Figure_1_figure_supplement_4.pdf
- elife_poa_e29391_Figure_12_figure_supplement_2.pdf
- elife_poa_e29391_Figure_11_figure_supplement_1.pdf
- elife_poa_e29391_Figure_8_figure_supplement_3.pdf
- elife_poa_e29391_Figure_1_figure_supplement_1.pdf
- elife_poa_e29391_Figure_8_figure_supplement_1.pdf
- elife_poa_e29391_Figure_1_figure_supplement_3.pdf
- elife_poa_e29391_Figure_10_figure_supplement_4.pdf
- elife_poa_e29391_Figure_10_figure_supplement_5.pdf
- elife_poa_e29391_Figure_10_figure_supplement_2.pdf
- elife_poa_e29391_Figure_8_figure_supplement_2.pdf
- elife_poa_e29391_Figure_9_figure_supplement_1.pdf
- elife_poa_e29391_Figure_10_figure_supplement_1.pdf
- elife_poa_e29391_Figure_11_figure_supplement_3.pdf
- elife_poa_e29391_Figure_1_figure_supplement_2.pdf
- elife_poa_e29391_Figure_12_figure_supplement_1.pdf
- elife_poa_e29391_Figure_11_figure_supplement_2.pdf
- elife_poa_e29391_Figure_9_source_data_1.xlsx
- elife_poa_e29391_Transparent_Reporting_File.pdf
