# Supplementary material for: Modifications at K31 on the lateral surface of histone H4 contribute to genome structure and expression in apicomplexan parasites
Source: eLife journal article supplement (doi:10.7554/elife.29391), 2017-11-03
Supplement: supp [file elife-29391-supp-v2.zip › elife_poa_e29391_Figure_9_source_data_1.xlsx]

## Sheet: Our RNA-Seq
Name	/description	Pru - linear total RPKM	psp6 - linear total RPKM	PSP6ttt - linear total RPKM	Pru_LPS - linear total RPKM	psp6_LPS - linear total RPKM	PSP6ttt_LPS - linear total RPKM
TGME49_270250	dense granule protein GRA1	6006.37	6279.26	5527.01	5975.13	5937.84	5511.13		Class 1	12.5523
TGME49_271050	SAG-related sequence SRS34A	4061.32	4267.21	4096.35	4230.23	3956.99	4216.24		Class 1	11.9877
TGME49_261740	hypothetical protein	3754.81	3854.72	3792.8	3885.69	3637.93	3764.44		Class 1	11.8745
TGME49_233460	SAG-related sequence SRS29B	3428.39	3590.44	3598.68	3401.49	3395.69	3698.22		Class 1	11.7433
TGME49_233480	SAG-related sequence SRS29C	2576.46	2560.97	2375.11	2593.97	2483.36	2314.12		Class 1	11.3312
TGME49_227620	dense granule protein GRA2	2471.88	2529.36	2332.81	2417.97	2368.85	2281.37		Class 1	11.2714
TGME49_286450	dense granule protein GRA5	2141.93	2172.68	1971.67	2117.51	2106.45	1994.42		Class 1	11.0647
TGME49_309590	rhoptry protein ROP1	2114.42	2131.5	2066.8	2137.82	2120.49	2063.5		Class 1	11.046
TGME49_316400	alpha tubulin TUBA1	1463.94	1594.2	1498.37	1496.74	1545.1	1533.46		Class 1	10.5156
TGME49_275440	dense granule protein GRA6	1367.6	1419.47	1405.1	1351.8	1335.8	1348.78		Class 1	10.4174
TGME49_258470	hypothetical protein	1222.47	1228.53	1164.58	1170.77	1145.84	1188.01		Class 1	10.2556
TGME49_227280	dense granule protein GRA3	1106.39	1110.99	969.015	1100.46	1052.53	964.824		Class 1	10.1117
TGME49_295110	rhoptry protein ROP7	996.715	886.758	983.415	1004.73	905.426	930.683		Class 1	9.96104
TGME49_232710	ribosomal protein RPS3A	939.45	1025.35	970.944	1027.48	948.831	1044		Class 1	9.87567
TGME49_310780	dense granule protein GRA4	891.173	908.866	936.97	894.964	882.697	900.895		Class 1	9.79956
TGME49_211680	protein disulfide isomerase	853.858	871.112	973.712	886.464	859.452	975.697		Class 1	9.73785
TGME49_204530	microneme protein MIC11	852.75	939.162	721.143	848.538	839.699	753.309		Class 1	9.73598
TGME49_247520	hypothetical protein	838.193	893.498	890.352	840.664	828.033	865.64		Class 1	9.71114
TGME49_325800	EGF family domain-containing protein	836.688	860.225	693.658	826.601	826.823	710.487		Class 1	9.70855
TGME49_277080	microneme protein MIC5	803.734	846.424	687.597	768.008	801.773	704.252		Class 1	9.65057
TGME49_263090	14-3-3 protein	776.233	770.675	808.416	779.675	711.01	790.71		Class 1	9.60035
TGME49_286420	elongation factor 1-alpha (EF-1-ALPHA), putative	760.265	809.681	755.869	792.652	798.29	749.931		Class 1	9.57036
TGME49_209030	actin ACT1	749.269	832.358	752.461	780.975	789.581	766.995		Class 1	9.54934
TGME49_224130	hypothetical protein	748.428	753.331	680.016	681.935	695.003	681.739		Class 1	9.54772
TGME49_245680	ribosomal protein RPL21	738.916	820.322	741.161	803.232	767.391	784.92		Class 1	9.52927
TGME49_242330	ribosomal protein RPS5	728.376	839.132	734.982	788.583	764.947	740.193		Class 1	9.50854
TGME49_203310	dense granule protein GRA7	703.984	688.38	608.32	674.148	645.587	625.373		Class 1	9.4594
TGME49_220400	actin depolymerizing factor ADF	697.048	757.622	684.751	737.128	705.286	709.833		Class 1	9.44511
TGME49_209910	histone H2Bv	695.645	708.672	761.598	716.981	660.409	763.613		Class 1	9.44221
TGME49_213580	hypothetical protein	684.899	729.999	682.702	753.137	682.74	681.053		Class 1	9.41975
TGME49_294800	elongation factor 1-alpha (EF-1-ALPHA), putative	681.882	733.536	617.89	688.237	726.068	627.595		Class 1	9.41338
TGME49_309810	ribosomal protein RPP2	681.064	756.035	714.898	767.159	699.995	749.634		Class 1	9.41165
TGME49_254720	dense granule protein GRA8	678.598	680.944	678.771	667.52	651.955	686.151		Class 1	9.40641
TGME49_205250	rhoptry protein ROP18	676.438	715.265	658.068	671.147	703.048	670.173		Class 1	9.40181
TGME49_237880	hypothetical protein	670.803	637.588	660.036	706.145	595.422	679.413		Class 1	9.38975
TGME49_201860	hypothetical protein	669.732	704.839	708.871	712.703	645.21	737.247		Class 1	9.38744
TGME49_288650	dense granule protein GRA12	665.094	657.518	619.576	642.049	651.44	586.32		Class 1	9.37741
TGME49_273760	heat shock protein HSP70	662.151	654.645	630.163	694.247	668.66	616.179		Class 1	9.37102
TGME49_217570	ribosomal protein RPS27	661.225	681.548	669.776	690.86	604.822	688.607		Class 1	9.369
TGME49_250710	microneme protein MIC10	660.992	680.265	527.663	636.477	627.213	553.351		Class 1	9.36849
TGME49_277240	NTPase I	660.174	732.596	679.346	700.557	664.908	667.014		Class 1	9.3667
TGME49_201390	hypothetical protein	657.937	702.772	605.585	658.519	648.733	606.347		Class 1	9.36181
TGME49_293360	hypothetical protein	644.816	650.126	625.025	676.752	614.582	668.039		Class 1	9.33274
TGME49_267400	ribosomal protein RPL32	627.338	661.966	637.595	645.12	613.331	646.803		Class 1	9.2931
TGME49_215530	hypothetical protein	619.775	660.868	660.997	636.289	601.117	674.907		Class 1	9.2756
TGME49_231630	alveolin domain containing intermediate filament IMC4	615.931	649.834	561.581	618.171	633.15	558.03		Class 1	9.26662
TGME49_232300	ribosomal protein RPS3	592.16	639.918	615.057	607.086	582.277	598.555		Class 1	9.20984
TGME49_319560	microneme protein MIC3	567.432	583.214	469.693	574.367	554.226	472.638		Class 1	9.1483
TGME49_271970	glideosome-associated protein with multiple-membrane spans GAPM3	557.261	577.066	528.131	548.526	582.178	549.586		Class 1	9.12221
TGME49_227330	hypothetical protein	551.798	599.113	597.105	573.617	542.186	559.64		Class 1	9.108
TGME49_219820	polyubiquitin UbC, putative	548.687	611.488	523.644	550.03	609.009	478.745		Class 1	9.09984
TGME49_291890	microneme protein MIC1	541.77	540.171	439.939	525.477	506.583	432.559		Class 1	9.08154
TGME49_200360	hypothetical protein	540.021	581.73	506.025	566.19	518.433	530.605		Class 1	9.07687
TGME49_215470	ribosomal protein RPL10A	529.793	569.156	535.679	565.608	519.799	552.519		Class 1	9.04928
TGME49_230160	hypothetical protein	521.684	531.693	526.338	517.004	489.347	518.725		Class 1	9.02703
TGME49_270240	MAG1	513.425	514.234	530.72	494.398	488.038	504.522		Class 1	9.00401
TGME49_225080	ribosomal protein RPS18	504.07	535.824	495.961	505.224	504.124	497.265		Class 1	8.97748
TGME49_218260	histone H3.3	503.565	495.711	482.185	500.996	466.813	489.173		Class 1	8.97603
TGME49_205340	ribosomal protein RPS12	500.652	519.42	504.073	542.832	477.484	498.626		Class 1	8.96766
TGME49_236950	hypothetical protein	494.072	513.088	500.037	512.264	507.833	521.949		Class 1	8.94858
TGME49_258580	rhoptry protein ROP17	489.457	479.988	508.492	482.21	460.468	482.926		Class 1	8.93504
TGME49_305520	ribosomal protein RPS2	482.614	519.915	493.343	512.632	481.395	477.393		Class 1	8.91473
TGME49_214080	toxofilin	481.741	436.306	471.141	504.421	422.283	510.633		Class 1	8.91211
TGME49_203630	ribosomal protein RPL44	481.681	551.249	515.595	513.916	507.652	518.868		Class 1	8.91193
TGME49_239100	ribosomal protein RPS7	480.327	535.686	498.434	493.539	480.193	504.54		Class 1	8.90787
TGME49_231640	alveolin domain containing intermediate filament IMC1	479.906	497.601	416.631	482.053	505.257	415.714		Class 1	8.90661
TGME49_293870	thioredoxin, putative	468.925	528.357	509.501	483.217	476.503	521.907		Class 1	8.87321
TGME49_257530	transporter, major facilitator family protein	464.003	425.694	410.785	473.486	438.287	390.218		Class 1	8.85799
TGME49_248480	ribosomal protein RPS9	461.723	476.156	458.899	488.401	460.801	483.968		Class 1	8.85088
TGME49_228470	ribosomal protein RPL15	454.61	476.092	455.789	486.003	450.532	469.636		Class 1	8.82849
TGME49_210690	ribosomal protein RPS6	454.274	470.183	441.106	447.72	434.376	440.571		Class 1	8.82742
TGME49_249900	adenine nucleotide translocator, putative	450.877	442.557	441.832	480.387	420.676	424.94		Class 1	8.81659
TGME49_234550	ribosomal protein RPL29	449.537	480.269	465.054	445.132	438.119	458.011		Class 1	8.8123
TGME49_263040	ribosomal protein RPS16	448.037	507.478	452.622	494.268	457.383	466.643		Class 1	8.80747
TGME49_249240	calmodulin, putative	443.406	484.211	459.209	451.559	427.251	446.517		Class 1	8.79248
TGME49_249850	GAP40 protein	439.097	486.841	436.293	464.884	471.782	441.545		Class 1	8.7784
TGME49_316340	hypothetical protein	438.34	455.347	392.057	433.002	427.667	396.842		Class 1	8.77591
TGME49_209290	ribosomal protein RPS28	438.042	482.952	428.536	474.408	447.688	454.269		Class 1	8.77493
TGME49_204020	ribosomal protein RPL8	423.343	438.294	415.948	433.018	419.387	423.063		Class 1	8.72568
TGME49_243545	hypothetical protein	420.613	457.065	397.576	448.033	452.223	408.368		Class 1	8.71635
TGME49_232350	lactate dehydrogenase LDH1	418.141	458.155	391.257	414.224	448.67	382.373		Class 1	8.70785
TGME49_305050	calmodulin, putative	410.91	441.042	435.657	396.711	415.423	420.808		Class 1	8.68268
TGME49_257090	NAC domain-containing protein	410.757	456.97	414.302	422.233	428.755	411.98		Class 1	8.68214
TGME49_261570	ribosomal protein RPL7A	408.893	415.399	394.962	418.394	400.9	409.271		Class 1	8.67558
TGME49_208030	microneme protein MIC4	404.842	399.953	334.897	386.958	398.359	328.267		Class 1	8.66122
TGME49_243570	ribosomal protein RPS26	403.657	432.753	399.495	429.27	397.585	429.222		Class 1	8.65699
TGME49_201780	microneme protein MIC2	402.477	383.313	320.994	375.211	396.958	307.125		Class 1	8.65276
TGME49_249250	ribosomal protein RPL35A	399.454	443.702	403.356	419.669	407.266	415.343		Class 1	8.64189
TGME49_311720	chaperonin protein BiP	396.993	389.904	397.455	418.793	405.609	390.436		Class 1	8.63297
TGME49_254620	ribosomal protein RPL39	395.822	412.425	401.647	428.566	382.182	426.223		Class 1	8.62871
TGME49_219270	multi-pass transmembrane protein	392.203	407.491	383.011	385.077	412.375	384.081		Class 1	8.61546
TGME49_219320	acid phosphatase GAP50	391.193	411.466	377.632	376.636	404.629	373.319		Class 1	8.61174
TGME49_251810	translation initiation factor eIF-5A, putative	386.293	422.476	371.612	417.359	420.144	408.084		Class 1	8.59355
TGME49_299050	ribosomal protein RPL17	385.766	426.102	377.653	412.487	381.245	378.187		Class 1	8.59158
TGME49_260260	ribosomal protein RPP1	383.374	397.888	388.028	413.444	381.529	412.855		Class 1	8.58261
TGME49_233030	gliding-associated protein GAP70	380.408	375.779	359.681	381.744	374.355	346.294		Class 1	8.5714
TGME49_295125	rhoptry protein ROP4	378.379	358.221	391.393	394.596	360.788	377.589		Class 1	8.56369
TGME49_258660	rhoptry protein ROP6	377.831	387.921	394.169	384.842	382.807	406.567		Class 1	8.5616
TGME49_244280	hypothetical protein	376.643	374.039	294.871	415.079	372.497	317.459		Class 1	8.55705
TGME49_234450	ribosomal protein RPS15A	375.415	385.524	370.086	397.445	364.128	384.17		Class 1	8.55234
TGME49_202500	GAPM1a	370.306	384.822	345.337	375.372	375.282	348.856		Class 1	8.53257
TGME49_221210	cyclophilin	370.261	380.478	412.609	391.55	333.973	412.338		Class 1	8.5324
TGME49_291840	hypothetical protein	370.095	414.059	372.954	425.187	381.821	412.924		Class 1	8.53175
TGME49_262620	RNA recognition motif-containing protein	368.41	375.261	335.064	353.17	368.638	324.938		Class 1	8.52517
TGME49_316255	hypothetical protein	367.275	374.716	400.968	388.687	333.606	390.632		Class 1	8.52072
TGME49_309820	ribosomal protein RPL11	366.892	384.316	369.763	383.227	349.959	373.578		Class 1	8.51921
TGME49_221620	beta-tubulin, putative	364.269	418.651	406.217	331.732	351.781	388.137		Class 1	8.50886
TGME49_255260	apical membrane antigen AMA1	362.395	369.261	297.593	348.035	363.536	297.064		Class 1	8.50142
TGME49_239330	ribosomal protein RPL37	358.374	389.509	343.681	376.833	339.457	369.515		Class 1	8.48532
TGME49_227360	ribosomal protein RPL3	356.039	377.829	365.47	361.574	366.747	367.439		Class 1	8.47589
TGME49_248390	ribosomal protein RPL26	354.014	371.814	370.404	361.571	336.169	365.533		Class 1	8.46766
TGME49_215460	ribosomal protein RPS24	353.175	386.06	360.019	398.163	350.452	381.23		Class 1	8.46424
TGME49_263700	ribosomal protein RPS14	351.493	376.888	350.689	387.556	352.952	367.927		Class 1	8.45735
TGME49_212290	ribosomal protein RPS19	348.801	371.02	360.396	380.887	353.934	390.872		Class 1	8.44626
TGME49_243730	rhoptry protein ROP9	347.674	384.055	396.254	351.246	363.2	395.175		Class 1	8.44159
TGME49_216000	alveolin domain containing intermediate filament IMC3	346.347	362.392	325.09	338.056	360.077	313.314		Class 1	8.43607
TGME49_218410	ribosomal protein RPP0	338.885	363.239	335.378	359.115	355.705	346.895		Class 1	8.40465
TGME49_230380	protein translocation complex, SEC61 gamma subunit	338.399	358.321	376.045	369.383	330.998	375.539		Class 1	8.40258
TGME49_231140	ribosomal protein RPS25	337.953	355.635	355.792	353.249	352.622	377.253		Class 1	8.40068
TGME49_214220	hypothetical protein	337.629	366.991	359.723	338.273	339.244	365.132		Class 1	8.3993
TGME49_239760	ribosomal protein RPL22	337.024	365.399	343.487	348.082	347.224	337.65		Class 1	8.39671
TGME49_313380	hypothetical protein	334.456	359.263	325.294	318.739	336.461	319.912		Class 1	8.38567
TGME49_320600	cold-shock DNA-binding domain-containing protein	330.409	350.578	340.441	346.728	321.801	338.147		Class 1	8.36811
TGME49_300200	histone H2AZ	329.512	348.859	349.23	343.681	321.009	346.621		Class 1	8.36419
TGME49_257680	myosin light chain MLC1	328.834	357.045	308.381	322.881	331.36	305.184		Class 1	8.36122
TGME49_210408	HMG (high mobility group) box domain-containing protein	326.393	329.357	345.143	335.361	316.948	335.63		Class 1	8.35047
TGME49_213350	ribosomal protein RPS15	324.423	340.758	326.292	348.19	318.678	342.501		Class 1	8.34173
TGME49_225555	hypothetical protein	324.387	358.792	341.996	364.76	314.83	345.565		Class 1	8.34157
TGME49_232230	ribosomal protein RPL30	323.014	346.921	306.867	343.26	341.712	313.917		Class 1	8.33545
TGME49_266060	ribosomal protein RPSA	321.231	324.579	304.139	338.193	326.855	313.007		Class 1	8.32747
TGME49_258410	photosensitized INA-labeled protein PHIL1	320.598	353.276	292.669	310.071	323.8	298.238		Class 1	8.32462
TGME49_284560	ribosomal protein RPL9	320.353	337.561	326.925	351.509	324.366	316.773		Class 1	8.32352
TGME49_207840	ribosomal protein RPS17	317.807	354.705	317.753	323.308	323.029	325.85		Class 1	8.31201
TGME49_293690	profilin PRF	315.208	335.377	328.698	336.682	314.609	338.372		Class 1	8.30016
TGME49_239740	dense granule protein GRA14	313.172	310.278	329.058	315.505	296.855	326.881		Class 1	8.29081
TGME49_308840	SAG-related sequence SRS51	310.583	309.293	308.938	294.921	292.993	298.611		Class 1	8.27884
TGME49_231080	ribosomal protein RPL38	309.714	324.654	309.429	316.552	304.351	304.939		Class 1	8.27479
TGME49_223940	GAP45	309.366	328.697	279.848	313.078	312.982	288.045		Class 1	8.27317
TGME49_236040	fructose-1,6-bisphosphate aldolase	309.324	341.653	338.384	311.341	325.898	321.15		Class 1	8.27297
TGME49_211290	rhoptry protein ROP15	307.87	306.714	295.265	309.048	305.467	292.747		Class 1	8.26618
TGME49_313390	ribosomal protein RPL6	306.017	315.991	302.459	325.344	305.001	314.032		Class 1	8.25747
TGME49_215785	rhoptry protein ROP2A	305.391	323.327	328.192	301.863	308.765	307.742		Class 1	8.25451
TGME49_249720	ATP synthase F0 subunit 9, putative	304.837	325.178	333.403	353.511	328.872	338.46		Class 1	8.25189
TGME49_270380	ribosomal protein RPS13	304.719	340.109	318.276	326.189	319.912	331.596		Class 1	8.25134
TGME49_289530	ribosomal protein RPL19	300.137	323.688	291.293	313.142	291.065	301.727		Class 1	8.22948
TGME49_263050	ribosomal protein RPL13	296.846	321.868	307.227	315.844	314.75	320.525		Class 1	8.21357
TGME49_205700	cyclophilin precursor	296.552	338.611	324.742	320.44	312.317	323.149		Class 1	8.21214
TGME49_259240	ribosomal protein RPS21	295.782	320.242	328.812	331.775	287.295	329.306		Class 1	8.20839
TGME49_308090	rhoptry protein ROP5	294.849	273.795	303.908	300.186	279.593	291.204		Class 1	8.20383
TGME49_266070	ribosomal protein RPL31	292.529	314.373	298.163	292.546	278.206	286.963		Class 1	8.19244
TGME49_262050	rhoptry kinase family protein ROP39	292.492	277.098	294.543	294.67	279.872	291.176		Class 1	8.19225
TGME49_312090	ribosomal protein RPL23	291.761	325.345	307.061	316.54	308.194	318.681		Class 1	8.18864
TGME49_238250	ribosomal protein RPL36	290.887	333.742	301.198	318.281	307.589	295.182		Class 1	8.18432
TGME49_259630	hypothetical protein	290.605	310.459	279.738	284.825	302.163	294.361		Class 1	8.18292
TGME49_236870	hypothetical protein	287.645	300.544	283.406	288.954	278.444	302.217		Class 1	8.16815
TGME49_310420	hypothetical protein	285.818	299.749	272.63	286.283	260.464	278.65		Class 1	8.15895
TGME49_242840	membrane protein	283.282	302.174	285.524	269.836	270.361	293.761		Class 1	8.1461
TGME49_324600	heat shock protein	282.907	304.074	257.208	273.319	267.985	272.34		Class 1	8.14418
TGME49_275810	ribosomal protein RPS10	281.989	296.738	270.808	296.598	283.372	270.553		Class 1	8.1395
TGME49_285870	SAG-related sequence SRS20A	281.85	302.467	287.869	279.243	285.218	291.556		Class 1	8.13878
TGME49_215220	hypothetical protein	281.759	281.532	266.952	266.622	285.453	251.918		Class 1	8.13832
TGME49_227600	ribosomal protein RPL34	280.111	290.263	277.694	293.519	270.08	288.28		Class 1	8.12985
TGME49_242340	ribosomal protein RPS29	279.353	296.975	278.032	300.962	287.267	282.29		Class 1	8.12595
TGME49_268790	hypothetical protein	278.048	283.32	302.184	257.4	262.405	289.863		Class 1	8.11919
TGME49_297070	hypothetical protein	276.915	276.357	295.161	282.717	270.691	285.184		Class 1	8.1133
TGME49_201170	hypothetical protein	276.123	270.07	250.93	263.354	257.557	256.292		Class 1	8.10917
TGME49_232940	heat shock protein HSP20	275.911	289.089	260.338	264.104	263.31	261.056		Class 1	8.10806
TGME49_310470	cytochrome C oxidase subunit IIb, putative	274.505	291.002	291.147	284.664	271.797	292.372		Class 1	8.10069
TGME49_277270	NTPase II	274.46	284.03	276.45	274.526	278.055	264.339		Class 1	8.10045
TGME49_229670	ribosomal protein RPS23	274.184	308.561	283.49	286.604	284.658	288.539		Class 1	8.099
TGME49_294790	hypothetical protein	273.507	294.196	305.45	289.911	273.663	290.231		Class 1	8.09543
TGME49_226410	EF-1 guanine nucleotide exchange domain-containing protein	269.848	282.299	287.287	286.558	280.91	280.198		Class 1	8.076
TGME49_245620	ribosomal-ubiquitin protein RPS27A	267.452	278.331	266.959	297.429	267.283	275.136		Class 1	8.06314
TGME49_310030	cyclase-associated protein, putative	265.833	264.305	262.336	255.745	265.966	261.405		Class 1	8.05438
TGME49_253690	hypothetical protein	264.478	298.203	266.565	269.955	270.141	259.554		Class 1	8.047
TGME49_288720	ribosomal protein RPL10	264.258	311.554	278.464	289.368	286.09	284.766		Class 1	8.0458
TGME49_216880	guanine nucleotide-binding protein	263	258.57	251.571	276.209	262.654	254.909		Class 1	8.03892
TGME49_288380	heat shock protein HSP90	262.584	267.15	238.97	260.831	273.308	231.156		Class 1	8.03664
TGME49_244320	ribosomal protein RPL24	258.393	286.446	263.67	274.669	255.016	268.211		Class 1	8.01342
TGME49_268850	enolase 2	257.729	253.235	291.423	258.178	248.436	296.453		Class 1	8.00971
TGME49_291960	rhoptry kinase family protein ROP40 (incomplete catalytic triad)	257.328	253.467	263.332	254.795	240.978	250.556		Class 1	8.00746
TGME49_207440	ribosomal protein RPS4	256.606	272.72	260.638	262.234	258.345	263.455		Class 1	8.00341
TGME49_267060	ribosomal protein RPL14	255.958	264.692	257.735	275.032	254.951	272.909		Class 1	7.99976
TGME49_262690	ribosomal protein RPL27	252.42	262.075	259.714	267.084	253.804	267.549		Class 1	7.97968
TGME49_262670	ribosomal protein RPL18A	252.129	259.422	248.87	259.948	246.067	259.509		Class 1	7.97802
TGME49_233450	SAG-related sequence SRS29A	249.66	213.656	265.087	264.053	225.687	261.862		Class 1	7.96382
TGME49_219690	hypothetical protein	249.484	261.225	242.879	262.293	248.923	251.707		Class 1	7.9628
TGME49_295100	hypothetical protein	249.457	250.508	241.521	256.237	228.142	237.165		Class 1	7.96265
TGME49_231160	hypothetical protein	247.414	243.567	247.795	260.229	244.474	258.494		Class 1	7.95078
TGME49_230210	alveolin domain containing intermediate filament IMC10	245.734	251.216	227.234	248.734	254.514	228.911		Class 1	7.94095
TGME49_209600	hypothetical protein	243.789	259.747	231.994	250.326	243.454	224.089		Class 1	7.92949
TGME49_223050	ribosomal protein RPS20	243.664	266.161	230.759	250.317	247.622	243.564		Class 1	7.92875
TGME49_295350	nucleoside diphosphate kinase, putative	243.388	262.885	260.012	261.75	248.035	256.579		Class 1	7.92711
TGME49_262500	hypothetical protein	242.548	236.437	220.902	233.917	247.832	215.404		Class 1	7.92213
TGME49_229480	calcium binding protein precursor, putative	239.633	238.112	257.291	254.042	238.29	250.361		Class 1	7.90468
TGME49_266960	beta tubulin	237.038	249.507	255.191	237.596	233.839	246.757		Class 1	7.88897
TGME49_297880	dense granule protein DG32	232.768	227.753	220.146	249.273	223.226	227.712		Class 1	7.86275
TGME49_292130	ribosomal protein RPL13A	232.53	246.55	232.539	246.228	231.009	244.305		Class 1	7.86127
TGME49_229250	ribosomal protein RPL28	232.369	247.498	236.973	261.012	229.476	243.12		Class 1	7.86027
TGME49_315320	SAG-related sequence SRS52A	231.334	208.211	227.193	232.047	195.587	212.023		Class 1	7.85383
TGME49_460890	28S ribosomal RNA	230.738	327.09	420.394	224.808	428.62	836.358		Class 1	7.85011
TGME49_232410	PDI family protein	230.333	231.666	196.347	234.729	221.635	191.848		Class 1	7.84758
TGME49_214940	MIC2-associated protein M2AP	229.726	217.842	199.148	223.663	211.586	198.13		Class 1	7.84377
TGME49_250770	eukaryotic initiation factor-4A, putative	228.305	241.508	212.53	250.191	241.362	221.534		Class 1	7.83482
TGME49_262730	rhoptry protein ROP16	226.335	222.601	245.483	221.37	221.115	239.7		Class 1	7.82232
TGME49_271930	hypothetical protein	225.95	250.292	218.123	215.978	234.003	224.68		Class 1	7.81986
TGME49_215775	rhoptry protein ROP8	224.519	233.689	245.895	249.299	223.103	247.15		Class 1	7.81069
TGME49_457990	28S ribosomal RNA	222.71	306.527	392.55	194.6	397.304	606.44		Class 1	7.79902
TGME49_320050	ribosomal protein RPL5	221.796	239.966	224.231	213.946	224.646	223.237		Class 1	7.79309
TGME49_260500	COPI associated protein, putative	221.722	228.518	229.053	215.776	215.872	226.38		Class 1	7.79261
TGME49_289750	ribosomal-ubiquitin protein RPL40	218.534	241.782	224.125	240.316	226.384	235.381		Class 1	7.77171
TGME49_266080	hypothetical protein	217.575	228.953	191.632	214.59	222.678	188.425		Class 1	7.76537
TGME49_314810	ribosomal protein RPL7	216.901	225.727	213.065	217.723	218.337	218.759		Class 1	7.76089
TGME49_245460	ribosomal protein RPS8	216.349	236.24	216.643	242.418	217.781	232.865		Class 1	7.75722
TGME49_218520	microneme protein MIC6	215.606	211.506	184.214	209.878	201.882	180.253		Class 1	7.75225
TGME49_208740	microneme protein, putative	215.338	181.763	197.798	201.862	160.451	182.422		Class 1	7.75046
TGME49_247030	hypothetical protein	213.354	195.912	199.881	213.773	217.809	195.088		Class 1	7.73711
TGME49_310490	ribosomal protein RPL27A	212.871	234.475	224.034	230.52	226.994	226.28		Class 1	7.73384
TGME49_233380	hypothetical protein	212.033	207.785	195.947	201.155	213.658	185.906		Class 1	7.72815
TGME49_211260	rhoptry kinase family protein ROP26 (incomplete catalytic triad)	211.735	210.53	243.209	214.272	205.485	229.086		Class 1	7.72612
TGME49_216180	hypothetical protein	211.18	209.691	222.22	225.964	201.56	234.809		Class 1	7.72233
TGME49_212270	hypothetical protein	207.881	220.263	186.027	206.428	192.96	179.182		Class 1	7.69961
TGME49_213280	SAG-related sequence SRS25	207.31	201.697	207.096	209.279	178.099	201.057		Class 1	7.69565
TGME49_237015	hypothetical protein	206.177	213.508	208.572	219.516	217.168	201.491		Class 1	7.68774
TGME49_245490	microneme protein MIC8	205.661	202.272	187.497	198.164	205.923	181.353		Class 1	7.68412
TGME49_224460	aminopeptidase n, putative	205.104	174.642	166.909	201.669	177.937	161.619		Class 1	7.68021
TGME49_252360	rhoptry kinase family protein ROP24 (incomplete catalytic triad)	204.342	194.703	219.109	214.391	189.856	215.36		Class 1	7.67484
TGME49_293740	hypothetical protein	200.737	209.322	193.527	203.429	191.736	188.6		Class 1	7.64916
TGME49_309120	ribosomal protein RPL4	200.524	192.379	189.453	204.355	203.7	201.704		Class 1	7.64763
TGME49_221380	alba 1	199.932	210.725	191.781	202.169	202.441	188.363		Class 1	7.64337
TGME49_268760	hypothetical protein	199.567	206.252	201.531	197.625	193.1	194.739		Class 1	7.64073
TGME49_238010	ribosomal protein RPL23A	199.028	211.392	202.934	206.259	205.733	207.084		Class 1	7.63683
TGME49_227810	rhoptry kinase family protein ROP11 (incomplete catalytic triad)	198.071	214.604	233.142	204.593	202.774	230.22		Class 1	7.62987
TGME49_246940	hypothetical protein	197.814	197.224	179.362	200.872	202.618	181.003		Class 1	7.628
TGME49_321520	hypothetical protein	197.709	203.424	187.753	200.895	213.6	189.181		Class 1	7.62723
TGME49_300190	ribosomal protein RPL37A	197.019	220.524	206.747	211.388	190.111	214.08		Class 1	7.62219
TGME49_220900	hypothetical protein	197.002	208.538	191.877	194.768	211.943	189.608		Class 1	7.62207
TGME49_205470	translation elongation factor 2 family protein, putative	195.915	197.233	187.707	201.891	202.464	183.054		Class 1	7.61408
TGME49_314260	hypothetical protein	194.251	188.553	212.673	201.275	181.531	211.197		Class 1	7.60178
TGME49_328700	hypothetical protein	194.245	197.582	213.308	185.931	187.713	210.727		Class 1	7.60173
TGME49_237230	hypothetical protein	193.817	195.318	163.343	186.938	187.09	158.731		Class 1	7.59855
TGME49_203290	hypothetical protein	189.315	188.135	211.041	193.198	167.6	212.076		Class 1	7.56464
TGME49_267500	hypothetical protein	189.079	197.742	184.515	189.427	182.712	183.065		Class 1	7.56285
TGME49_289690	glyceraldehyde-3-phosphate dehydrogenase GAPDH1	189.004	180.203	178.149	199.108	187.466	191.282		Class 1	7.56227
TGME49_205330	hypothetical protein	188.587	195.42	201.214	190.195	176.7	199.091		Class 1	7.55909
TGME49_239820	D-3-phosphoglycerate dehydrogenase	188.581	193.843	194.001	186.393	183.719	185.266		Class 1	7.55904
TGME49_250810	ribosomal protein RPL35	186.881	201.219	189.076	205.198	193.004	206.384		Class 1	7.54598
TGME49_247350	thioredoxin domain-containing protein	185.725	196.466	204.288	190.931	184.624	205.334		Class 1	7.53702
TGME49_217520	hypothetical protein	185.384	186.439	189.333	191.372	173.198	199.287		Class 1	7.53437
TGME49_215960	hypothetical protein	184.212	206.547	174.015	184.777	186.257	169.793		Class 1	7.52522
TGME49_231850	serine-threonine phosophatase 2C (PP2C)	183.458	186.022	185.601	184.371	185.853	190.342		Class 1	7.51931
TGME49_244560	heat shock protein 90, putative	180.138	174.9	188.849	186.973	187.652	185.107		Class 1	7.49296
TGME49_249200	Ctr copper transporter family protein	179.77	173.612	183.476	167.521	161.552	174.722		Class 1	7.49001
TGME49_248700	alveolin domain containing intermediate filament IMC12	178.947	188.643	176.628	179.406	180.895	175.004		Class 1	7.48339
TGME49_248340	GTP-binding nuclear protein ran/tc4	178.591	188.589	170.271	190.422	182.332	166.713		Class 1	7.48052
TGME49_290700	hypothetical protein	177.886	179.28	163.451	170.797	165.805	147.945		Class 1	7.47481
TGME49_289370	hypothetical protein	175.663	176.918	168.551	166.541	169.704	173.701		Class 1	7.45667
TGME49_226970	ribosomal protein RPS11	174.572	186.947	166.948	190.267	180.291	178.889		Class 1	7.44768
TGME49_264040	hypothetical protein	173.096	181.769	191.105	181.486	171.532	206.73		Class 1	7.43543
TGME49_291040	lactate dehydrogenase LDH2	171.699	158.737	154.806	161.965	147.822	155.011		Class 1	7.42374
TGME49_254440	ribosomal protein RPL12	170.598	186.102	175.453	183.192	176.069	181.974		Class 1	7.41446
TGME49_289650	PEP-carboxykinase I	169.295	166.21	172.766	158.605	158.278	160.293		Class 1	7.4034
TGME49_321900	fructose-1,6-bisphosphate aldolase	168.122	177.099	178.164	166.283	171.874	176.158		Class 1	7.39336
TGME49_295360	hypothetical protein	168.074	191.496	152.734	163.63	176.255	161.103		Class 1	7.39295
TGME49_305250	hypothetical protein	167.28	159.065	172.078	168.687	152.68	170.252		Class 1	7.38612
TGME49_218270	hypothetical protein	165.297	166.717	193.932	180.563	162.453	191.382		Class 1	7.36892
TGME49_216860	DEAD (Asp-Glu-Ala-Asp) box polypeptide DDX39	164.41	161.855	166.199	167.019	158.313	163.562		Class 1	7.36115
TGME49_220270	alveolin domain containing intermediate filament IMC6	164.123	166.459	157.426	158.884	164.782	147.458		Class 1	7.35863
TGME49_211040	Sec61beta family protein	163.989	168.657	174.407	170.441	162.956	195.322		Class 1	7.35746
TGME49_218820	alba 2	163.136	172.299	156.466	173.342	164.477	165.3		Class 1	7.34993
TGME49_230480	hypothetical protein	163.089	164.645	164.591	185.866	167.961	168.64		Class 1	7.34952
TGME49_235690	hypothetical protein	162.977	186.867	164.742	175.925	173.927	171.923		Class 1	7.34852
TGME49_219750	cytochrome c, putative	162.461	165.196	171.651	174.08	163.826	193.353		Class 1	7.34395
TGME49_217510	hypothetical protein	162.162	176.619	143.146	150.441	175.163	138.347		Class 1	7.34129
TGME49_200250	microneme protein MIC17A	160.81	133.161	189.069	174.73	128.471	189.341		Class 1	7.32921
TGME49_243460	hypothetical protein	160.61	146.113	157.953	153.117	159.829	152.5		Class 1	7.32742
TGME49_263520	microtubule associated protein SPM1	160.159	163.226	143.008	150.663	148.534	145.165		Class 1	7.32336
TGME49_286530	hypothetical protein	159.263	168.029	169.743	168.367	154.922	167.207		Class 1	7.31527
TGME49_280380	poly(ADP-ribose) glycohydrolase	157.829	148.002	152.631	157.936	143.316	138.063		Class 1	7.30222
TGME49_313640	hypothetical protein	157.235	156.565	166.859	167.151	148.098	169.794		Class 1	7.29678
TGME49_262710	Ctr copper transporter family protein	157.204	156.288	156.474	156.953	150.731	156.157		Class 1	7.29649
TGME49_315610	hypothetical protein	155.693	158.654	148.289	155.231	153.04	143.058		Class 1	7.28256
TGME49_226430	reticulon protein	155.143	165.818	161.005	165.205	160.564	152.804		Class 1	7.27745
TGME49_316310	superoxide dismutase	151.916	151.523	148.885	151.745	141.386	151.632		Class 1	7.24713
TGME49_232660	Hsp70 interacting protein HIP	151.817	154.641	151.026	155.076	159.035	147.031		Class 1	7.24619
TGME49_212980	hypothetical protein	150.993	149.08	144.271	148.435	150.568	142.586		Class 1	7.23834
TGME49_217555	hypothetical protein	150.237	166.786	151.906	155.554	157.596	151.298		Class 1	7.2311
TGME49_264990	hypothetical protein	150.165	153.441	141.264	145.352	151.926	147.66		Class 1	7.2304
TGME49_268980	hypothetical protein	148.639	162.782	136.466	142.955	149.445	128.857		Class 1	7.21567
TGME49_226570	hypothetical protein	148.345	151.589	150.355	150.252	144.884	146.017		Class 1	7.21281
TGME49_275860	hypothetical protein	147.925	160.481	171.355	147.304	145.167	163.552		Class 1	7.20872
TGME49_300000	ribosomal protein RPL18	146.874	157.072	149.877	150.559	143.186	153.187		Class 1	7.19844
TGME49_309210	peroxiredoxin 6, putative	146.222	153.299	163.084	158.645	141.709	156.949		Class 1	7.19202
TGME49_251540	dense granule protein GRA9	145.816	144.613	129.578	144.853	139.359	129.246		Class 1	7.18801
TGME49_235470	myosin A	145.153	145.587	129.356	139.431	147.385	125.644		Class 1	7.18143
TGME49_251680	histamine-releasing factor, putative	144.49	150.495	144.616	154.689	145.266	151.493		Class 1	7.17483
TGME49_268220	hypothetical protein	143.637	137.981	133.76	140.989	143.912	132.128		Class 1	7.16628
TGME49_225560	hypothetical protein	143.523	136.847	144.039	133.695	131.676	134.625		Class 1	7.16514
TGME49_319350	SAG-related sequence SRS17B	143.387	137.433	141.596	138.396	121.236	129.382		Class 1	7.16377
TGME49_265790	hypothetical protein	143.141	145.373	126.641	132.558	138.173	127.036		Class 1	7.16129
TGME49_276940	ribosome associated membrane protein RAMP4, putative	142.506	148.722	122.902	154.696	139.846	127.605		Class 1	7.15488
TGME49_230705	hypothetical protein	142.488	158.224	156.072	147.371	152.698	137.265		Class 1	7.1547
TGME49_310790	hypothetical protein	142.413	155.838	133.711	140.807	149.383	137.016		Class 1	7.15394
TGME49_228760	hypothetical protein	140.796	145.836	141.178	144.355	140.112	139.008		Class 1	7.13746
TGME49_260620	hypothetical protein	139.679	137.228	135.254	137.918	137.259	137.953		Class 1	7.12597
TGME49_308020	SAG-related sequence SRS57	139.506	137.48	139.612	133.203	130.505	137.831		Class 1	7.12418
TGME49_237180	hypothetical protein	138.929	141.429	149.131	143.995	132.574	144.619		Class 1	7.1182
TGME49_219730	hypothetical protein	138.263	137.329	133.056	137.299	135.29	136.121		Class 1	7.11127
TGME49_460040	18S ribosomal RNA	137.908	168.321	228.661	104.355	257.454	455.558		Class 1	7.10756
TGME49_273860	hypothetical protein	135.92	128.836	137.729	133.764	126.146	129.278		Class 1	7.08661
TGME49_294200	glucose-6-phosphate 1-dehydrogenase	135.822	128.009	133.071	135.277	120.438	128.165		Class 1	7.08557
TGME49_201880	hypothetical protein	134.943	140.532	128.222	131.946	133.231	129.764		Class 1	7.07621
TGME49_300140	elongation factor 1-gamma, putative	133.945	131.899	138.515	141.787	131.846	131.989		Class 1	7.0655
TGME49_205558	NAC domain-containing protein	132.884	138.047	125.425	124.224	130.214	126.069		Class 1	7.05402
TGME49_256030	hypothetical protein	132.313	135.774	140.341	129.088	126.111	141.829		Class 1	7.04781
TGME49_217890	alkyl hydroperoxide reductase/ Thiol specific antioxidant/ Mal allergen, putative	132.136	128.266	130.984	137.545	119.538	134.553		Class 1	7.04588
TGME49_286590	microtubule associated protein SPM2	132.102	136.863	123.714	131.567	132.318	127.108		Class 1	7.04551
TGME49_313910	RNA recognition motif 2 protein	131.823	126.528	119.863	129.105	133.817	116.618		Class 1	7.04246
TGME49_232630	hypothetical protein	131.738	141.614	126.929	141.364	135.502	131.621		Class 1	7.04153
TGME49_312270	rhoptry protein ROP13	131.502	119.165	138.612	125.953	119.218	131.6		Class 1	7.03894
TGME49_306895	hypothetical protein	130.76	128.308	130.103	124.787	121.035	125.178		Class 1	7.03078
TGME49_204050	subtilisin SUB1	130.048	105.386	110.134	120.851	103.852	105.426		Class 1	7.0229
TGME49_213940	CHCH domain-containing protein	130.035	137.909	127.966	138.383	131.912	130.73		Class 1	7.02276
TGME49_243690	hypothetical protein	129.927	133.298	135.029	132.576	121.388	140.407		Class 1	7.02156
TGME49_236650	DEAD (Asp-Glu-Ala-Asp) box polypeptide 17	129.252	120.842	117.323	121.9	118.637	115.776		Class 1	7.01404
TGME49_229010	rhoptry neck protein RON4	128.825	124.297	131.847	126.285	130.854	128.442		Class 1	7.00927
TGME49_310700	serine/threonine phosophatase PP1	128.737	136.76	130.839	126.506	130.627	124.683		Class 1	7.00828
TGME49_286090	translation initiation factor SUI1, putative	128.28	138.369	133.431	134.121	129.962	132.068		Class 1	7.00315
TGME49_240090	rhoptry kinase family protein ROP34, putative	128.02	142.027	108.486	121.169	142.387	102.392		Class 1	7.00023
TGME49_290970	8-amino-7-oxononanoate synthase	127.624	99.127	132.882	112.584	91.141	120.093		Class 1	6.99576
TGME49_272660	hypothetical protein	126.829	139.334	144.312	134.43	128.775	136.348		Class 1	6.98674
TGME49_225150	hypothetical protein	126.095	121.391	139.97	127.933	117.359	134.897		Class 1	6.97837
TGME49_249370	translation initiation factor SUI1, putative	125.867	133.356	136.363	133.761	125.016	144.058		Class 1	6.97576
TGME49_247440	hypothetical protein	125.159	127.826	113.716	119.774	127.03	110.32		Class 1	6.96762
TGME49_253180	hypothetical protein	124.635	123.012	114.299	123.407	114.348	111.985		Class 1	6.96157
TGME49_269442	calmodulin, putative	124.222	145.539	128.221	135.288	129.737	128.235		Class 1	6.95678
TGME49_261780	microneme protein MIC7	124.137	133.651	122.533	124.764	132.284	118.248		Class 1	6.95579
TGME49_276140	ADP ribosylation factor ARF1	124.123	130.988	129.686	127.957	131.102	129.799		Class 1	6.95563
TGME49_286630	redoxin domain-containing protein	124.097	118.698	146.714	134.686	118.763	146.474		Class 1	6.95532
TGME49_306670	hypothetical protein	123.58	127.487	130.785	126.386	125.369	132.146		Class 1	6.9493
TGME49_232130	hypothetical protein	123	139.256	116.084	119.034	135.829	118.624		Class 1	6.94251
TGME49_257160	hypothetical protein	122.943	131.113	122.034	119.528	119.783	126.785		Class 1	6.94185
TGME49_262640	Cg8 family protein	122.353	129.89	129.586	126.332	121.74	130.098		Class 1	6.93491
TGME49_316250	hypothetical protein	121.636	115.712	105.707	109.413	112.327	106.448		Class 1	6.92643
TGME49_293430	hypothetical protein	121.308	123.049	124.453	119.91	114.826	126.03		Class 1	6.92253
TGME49_239770	alveolin domain containing intermediate filament IMC11	120.983	117.731	111.181	124.339	111.351	111.52		Class 1	6.91866
TGME49_214250	hypothetical protein	120.407	130.085	120.161	129.617	126.347	126.169		Class 1	6.91178
TGME49_290300	hypothetical protein	120.261	129.174	115.785	116.23	120.989	116.108		Class 1	6.91003
TGME49_248990	hypothetical protein	118.889	118.636	114.564	120.458	112.566	114.925		Class 1	6.89347
TGME49_260440	nuclear factor NF3	118.557	120.414	106.315	121.815	115.276	110.318		Class 1	6.88944
TGME49_308860	hypothetical protein	118.322	124.13	112.819	112.631	126.407	110.266		Class 1	6.88657
TGME49_254120	autophagy-related protein 8 atg8, putative	117.936	127.761	126.499	120.336	117.425	126.097		Class 1	6.88186
TGME49_253430	asparagine synthetase, putative	117.742	109.455	109.604	109.527	106.377	105.471		Class 1	6.87949
TGME49_258820	hypothetical protein	117.434	127.801	132.216	122.571	116.48	138.38		Class 1	6.87571
TGME49_252210	pentatricopeptide repeat domain-containing protein	117.339	98.607	109.974	109.643	102.472	101.16		Class 1	6.87454
TGME49_203990	rhoptry protein ROP12	116.954	118.862	121.062	120.661	122.005	119.562		Class 1	6.8698
TGME49_256000	endoplasmic reticulum retention receptor	116.718	121.256	117.294	126.538	122.195	120.858		Class 1	6.86688
TGME49_271935	hypothetical protein	116.663	118.853	104.611	113.992	110.968	100.903		Class 1	6.8662
TGME49_236890	hypothetical protein	116.344	122.591	114.532	122.093	114.421	111.311		Class 1	6.86225
TGME49_280370	hypothetical protein	116.174	105.808	98.395	108.225	106.165	96.145		Class 1	6.86014
TGME49_246550	aspartyl protease ASP3	116.07	113.874	114.719	117.838	109.983	117.708		Class 1	6.85885
TGME49_232250	catalase	116.01	114.598	114.593	113.299	113.493	111.46		Class 1	6.85811
TGME49_316280	transporter, major facilitator family protein	115.685	118.845	129.015	120.569	111.819	135.846		Class 1	6.85406
TGME49_210370	hypothetical protein	115.684	122.767	131.53	123.35	109.346	126.197		Class 1	6.85405
TGME49_205170	hypothetical protein	115.369	136.123	110.016	118.884	135.522	108.675		Class 1	6.85011
TGME49_247770	hypothetical protein	115.286	136.372	126.228	130.683	124.625	130.145		Class 1	6.84907
TGME49_322000	myosin-light-chain kinase	115.173	119.802	118.871	115.902	127.433	111.924		Class 1	6.84766
TGME49_264080	acyl carrier protein ACP	114.628	113.448	133.127	121.337	107.438	137.908		Class 1	6.84082
TGME49_242820	hypothetical protein	114.618	114.074	114.576	114.49	111.943	115.919		Class 1	6.84069
TGME49_221510	hypothetical protein	114.509	122.465	118.111	122.527	117.948	120.798		Class 1	6.83932
TGME49_266300	hypothetical protein	114.192	122.092	127.334	123.026	128.813	137.951		Class 1	6.83532
TGME49_312160	hypothetical protein	113.958	123.167	109.731	112.765	108.474	116.183		Class 1	6.83236
TGME49_269950	hypothetical protein	113.941	118.571	101.139	110.081	122.016	94.87		Class 1	6.83214
TGME49_294230	hypothetical protein	113.808	124.687	129.728	127.173	113.854	127.568		Class 1	6.83046
TGME49_262490	alpha/beta hydrolase, putative	113.39	119.947	105.933	112.473	119.905	101.207		Class 1	6.82515
TGME49_256050	signal recognition particle 14kd protein	113.007	112.984	111.746	122.735	113.763	117.644		Class 1	6.82027
TGME49_288245	hypothetical protein	112.714	131.769	124.141	124.166	118.229	133.961		Class 1	6.81652
TGME49_227380	hypothetical protein	112.068	97.774	108.262	109.086	101.732	99.276		Class 1	6.80823
TGME49_209090	proteasome maturation factor ump1 protein	111.832	110.027	117.64	125.041	114.876	126.706		Class 1	6.80519
TGME49_223590	proteasome subunit	111.791	115.351	129.853	128.252	114.848	138.364		Class 1	6.80466
TGME49_323100	hypothetical protein	111.309	95.5	106.693	102.592	94.174	110.957		Class 1	6.79843
TGME49_260820	IMC sub-compartment protein ISP1	111.238	112.396	116.266	113.843	106.62	118.272		Class 1	6.79751
TGME49_321500	RNA recognition motif-containing protein	111.17	110.885	103.485	109.33	114.178	105.495		Class 1	6.79662
TGME49_297430	hypothetical protein	110.625	113.534	109.847	110.68	109.403	103.498		Class 1	6.78953
TGME49_315490	rhoptry protein ROP10	110.457	111.707	110.646	108.138	112.925	111.151		Class 1	6.78734
TGME49_208450	protease inhibitor PI2	110.391	100.046	105.004	110.204	90.639	94.106		Class 1	6.78648
TGME49_230520	cyclophilin 1, putative	110.374	110.537	119.466	119.789	113.909	116.198		Class 1	6.78626
TGME49_212310	vacuolar ATP synthetase	110.323	118.091	115.4	115.737	114.427	112.383		Class 1	6.78559
TGME49_202200	hypothetical protein	110.046	104.466	119.648	109.093	97.373	110.48		Class 1	6.78196
TGME49_215350	hypothetical protein	109.99	110.489	110.526	118.676	111.08	111.839		Class 1	6.78123
TGME49_321680	hypothetical protein	109.321	112.619	101.239	107.358	111.051	102.474		Class 1	6.77243
TGME49_316260	hypothetical protein	109.246	110.137	120.624	111.246	104.971	122.666		Class 1	6.77144
TGME49_319340	hypothetical protein	108.814	107.07	104.407	109.635	103.93	97.785		Class 1	6.76572
TGME49_222170	dense-granule antigen DG32	108.701	102.569	102.505	110.406	101.025	106.903		Class 1	6.76422
TGME49_244530	hypothetical protein	108.432	108.351	101.951	107.984	109.698	100.193		Class 1	6.76065
TGME49_229920	hypothetical protein	108.149	105.791	102.418	106.176	105.973	104.897		Class 1	6.75688
TGME49_208830	hypothetical protein	107.699	111.763	98.238	108.869	106.294	96.085		Class 1	6.75086
TGME49_239890	SCP family extracellular subfamily protein	107.389	100.825	115.185	109.386	94.261	110.757		Class 1	6.7467
TGME49_247530	hypothetical protein	107.36	108.143	103.568	111.364	94.227	102.122		Class 1	6.74631
TGME49_286600	hypothetical protein	107.278	105.566	104.665	106.371	103.389	103.105		Class 1	6.74521
TGME49_226030	AGC kinase	107.203	107.873	103.034	107.507	108.505	112.154		Class 1	6.7442
TGME49_293440	hypothetical protein	106.924	112.313	126.255	114.103	102.445	125.798		Class 1	6.74044
TGME49_282055	protein phosphatase PP2C-hn	106.919	99.585	114.94	107.552	99.978	113.29		Class 1	6.74037
TGME49_267420	mago nashi family protein 2, putative	106.904	110.572	108.265	107.95	99.999	106.26		Class 1	6.74017
TGME49_261950	ATP synthase beta subunit ATP-B	106.786	107.628	109.658	111.512	111.401	111.208		Class 1	6.73858
TGME49_266920	3'5'-cyclic nucleotide phosphodiesterase domain-containing protein	106.425	103.154	102.149	105.718	99.18	100.125		Class 1	6.73369
TGME49_258730	hypothetical protein	105.991	98.908	123.764	102.895	94.636	124.836		Class 1	6.7278
TGME49_293510	poly(ADP-ribose) polymerase and DNA-Ligase Zn-finger region domain-containing protein	105.741	105.096	98.196	106.368	101.994	101.563		Class 1	6.72439
TGME49_249270	protein disulfide isomerase-related protein (provisional), putative	105.325	101.589	121.503	108.981	102.533	116.775		Class 1	6.7187
TGME49_213067	hypothetical protein	105.06	108.885	105.332	108.357	112.072	107.442		Class 1	6.71507
TGME49_321570	beta-hydroxyacyl-acyl carrier protein dehydratase (FABZ)	104.979	118.189	119.976	109.995	103.079	118.505		Class 1	6.71396
TGME49_293180	NADP-specific glutamate dehydrogenase	104.887	119.093	112.123	105.922	115.913	104.294		Class 1	6.71269
TGME49_211630	hypothetical protein	104.687	113.469	96.626	102.99	114.291	96.348		Class 1	6.70994
TGME49_213660	zinc finger (CCCH type) motif-containing protein	104.595	94.795	111.369	104.76	98.091	103.703		Class 1	6.70867
TGME49_263300	eukaryotic porin protein	104.556	105.673	105.137	107.577	104.425	101.953		Class 1	6.70813
TGME49_226380	hypothetical protein	104.486	106.968	92.293	103.388	101.617	88.869		Class 1	6.70717
TGME49_232670	hypothetical protein	104.417	88.742	95.436	91.336	92.531	85.147		Class 1	6.70621
TGME49_207060	ribonucleoside-diphosphate reductase small subunit	104.283	104.781	111.217	104.542	99.723	104.027		Class 1	6.70436
TGME49_271810	lanp, putative	103.822	102.869	102.949	112.213	104.659	104.054		Class 1	6.69797
TGME49_236570	lysine decarboxylase family protein	103.763	104.673	106.964	101.169	105.209	107.52		Class 1	6.69715
TGME49_289970	hypothetical protein	103.453	105.663	100.671	96.942	100.949	103.684		Class 1	6.69283
TGME49_289600	heat shock protein HSP29	103.45	100.273	89.698	102.452	95.363	85.028		Class 1	6.69279
TGME49_221910	AN1 family Zinc finger domain-containing protein	103.4	104.8	98.019	102.879	105.691	97.403		Class 1	6.69209
TGME49_294610	histone lysine methyltransferase, SET, putative	103.267	98.46	90.024	97.015	101.77	83.079		Class 1	6.69024
TGME49_243200	hypothetical protein	103.232	106.612	104.484	98.224	109.705	99.478		Class 1	6.68975
TGME49_204130	perforin-like protein PLP1	103.136	92.746	93.931	98.677	99.084	91.208		Class 1	6.6884
TGME49_215490	transporter, major facilitator family protein	103.056	106.918	99.423	107.706	103.306	97.636		Class 1	6.68728
TGME49_212770	hypothetical protein	102.737	106.849	97.791	98.817	108.252	96.698		Class 1	6.68281
TGME49_209260	cytochrome c oxidase subunit, putative	102.476	103.834	107.046	106.365	101.402	112.118		Class 1	6.67914
TGME49_315750	hypothetical protein	102.07	96.48	92.31	95.552	93.872	95.42		Class 1	6.67342
TGME49_248360	hypothetical protein	101.63	100.447	110.041	104.359	98.236	102.22		Class 1	6.66718
TGME49_319870	ubiquitin-conjugating enzyme subfamily protein	101.329	105.096	104.057	104.967	105.185	107.929		Class 1	6.6629
TGME49_269190	glyceraldehyde-3-phosphate dehydrogenase GAPDH2	101.104	98.575	104.296	101.122	103.468	98.047		Class 1	6.6597
TGME49_278530	multiprotein bridging factor type 1 family transcriptional co-activator, putative	101.086	102.224	92.777	105.592	102.132	95.112		Class 1	6.65944
TGME49_226860	SAG-related sequence SRS67	101.036	105.592	97.75	102.304	101.611	98.815		Class 1	6.65873
TGME49_258870	hypothetical protein	100.866	83.33	90.39	92.942	80.368	85.852		Class 1	6.6563
TGME49_244250	hypothetical protein	100.609	99.315	105.337	99.659	104.575	103.247		Class 1	6.65262
TGME49_253820	hypothetical protein	100.167	102.1	84.532	97.218	95.045	89.077		Class 1	6.64626
TGME49_325400	ribosomal L37ae family protein	100.097	111.63	105.657	106.679	96.313	112.823		Class 1	6.64525
TGME49_241240	hypothetical protein	100.094	94.821	89.263	92.962	96.951	86.128		Class 1	6.64521
TGME49_297810	hypothetical protein	99.954	106.233	106.504	103.867	98.556	107.544		Class 1	6.64319
TGME49_263320	hypothetical protein	99.767	104.62	99.178	99.902	96.79	98.54		Class 1	6.64049
TGME49_297060	phosphoglycerate mutase PGMII	99.001	106.909	110.722	107.77	107.131	119.127		Class 1	6.62937
TGME49_211030	hypothetical protein	98.969	101.478	107.215	100.561	95.104	107.712		Class 1	6.6289
TGME49_314450	hypothetical protein	98.883	97.076	91.847	99.365	103.675	90.198		Class 1	6.62765
TGME49_322010	myosin-light-chain kinase	98.463	97.071	102.582	97.876	95.264	95.64		Class 1	6.62151
TGME49_278540	hypothetical protein	98.298	95.088	103.477	101.506	100.286	110.344		Class 1	6.61909
TGME49_290200	NAD/NADP octopine/nopaline dehydrogenase, alpha-helical domain-containing protein	97.916	101.73	111.188	103.226	100.051	112.088		Class 1	6.61347
TGME49_270360	hypothetical protein	97.873	111.996	108.525	112.516	105.882	114.423		Class 1	6.61284
TGME49_318160	MSP (Major sperm protein) domain-containing protein	97.456	103.644	102.987	104.499	99.918	99.42		Class 1	6.60668
TGME49_236550	hypothetical protein	97.284	101.913	98.349	100.76	104.313	103.257		Class 1	6.60413
TGME49_311010	hypothetical protein	96.997	104.021	98.239	104.714	98.856	97.916		Class 1	6.59987
TGME49_310640	phosphorylase family protein	96.992	109.502	107.621	104.29	94.969	108.456		Class 1	6.59979
TGME49_309560	nmda receptor glutamate-binding chain	96.983	90.562	101.485	95.451	88.949	97.062		Class 1	6.59966
TGME49_265330	cell-cycle-associated protein kinase GSK, putative	96.869	95.175	99.017	100.454	93.538	99.761		Class 1	6.59796
TGME49_462910	large subunit ribosomal RNA	96.701	90.01	61.139	109.116	70.081	63.57		Class 1	6.59546
TGME49_232030	hypothetical protein	96.66	98.94	90.191	95.897	91.465	90.703		Class 1	6.59485
TGME49_227030	hypothetical protein	96.113	102.765	94.996	96.766	94.626	98.623		Class 1	6.58666
TGME49_235930	domain K- type RNA binding proteins family protein	96.045	96.761	92.019	92.991	95.97	93.896		Class 1	6.58564
TGME49_259940	hypothetical protein	95.904	97.456	94.181	98.548	98.04	92.767		Class 1	6.58352
TGME49_219140	EF-1 guanine nucleotide exchange domain-containing protein	95.142	99.709	99.885	99.985	88.93	102.538		Class 1	6.57201
TGME49_318230	phosphoglycerate kinase PGKI	94.901	88.345	102.544	98.985	88.807	100.058		Class 1	6.56835
TGME49_265370	hypothetical protein	94.788	97.975	102.949	97.566	98.755	103.742		Class 1	6.56663
TGME49_226710	hypothetical protein	94.734	97.942	99.529	99.157	98.518	99.433		Class 1	6.56581
TGME49_270510	asparaginyl-tRNA synthetase (NOB+tRNA synthase)	93.699	93.428	85.417	100.888	96.291	81.53		Class 1	6.54996
TGME49_300040	ubiquitin-conjugating enzyme subfamily protein	93.343	84.618	98.785	90.755	89.503	93.558		Class 1	6.54447
TGME49_235880	brain protein 44 family protein	93.077	90.527	92.962	95.194	87.236	93.97		Class 1	6.54035
TGME49_208440	hypothetical protein	92.961	93.931	90.135	99.575	86.588	86.848		Class 1	6.53855
TGME49_315210	rhoptry protein, putative	92.754	84.551	96.496	89.225	87.366	95.999		Class 1	6.53534
TGME49_283540	hypothetical protein	92.442	99.951	89.238	87.886	95.531	85.966		Class 1	6.53048
TGME49_205320	hypothetical protein	92.351	90.533	81.835	88.32	88.146	79.245		Class 1	6.52906
TGME49_302055	ribosomal protein S12	92.008	88.057	41.683	103.58	47.722	46.428		Class 1	6.52369
TGME49_267070	aquaporin 2	91.733	94.266	95.65	96.344	92.662	100.237		Class 1	6.51937
TGME49_289910	hypothetical protein	91.398	95.483	85.896	85.379	91.854	88.733		Class 1	6.51409
TGME49_249990	hypothetical protein	91.357	83.804	85.426	90.877	87.608	82.946		Class 1	6.51344
TGME49_288360	tryptophanyl-tRNA synthetase (TrpRS2)	91.084	81.775	76.542	86.478	86.92	74.056		Class 1	6.50913
TGME49_312940	hypothetical protein	90.848	99.362	96.01	96.314	94.251	97.775		Class 1	6.50538
TGME49_206690	glideosome-associated protein with multiple-membrane spans GAPM2B	90.588	99.655	82.602	92.002	96.754	87.533		Class 1	6.50125
TGME49_254080	metal cation transporter, ZIP family protein	90.57	85.842	88.016	88.604	84.036	87.525		Class 1	6.50096
TGME49_233350	nuclear transport factor 2, putative	90.266	92.281	93.04	89.169	88.956	98.652		Class 1	6.49611
TGME49_223920	rhoptry neck protein RON3	89.825	87.58	88.605	86.814	93.538	88.311		Class 1	6.48905
TGME49_266460	small ubiquitin family modifier, putative	89.464	90.26	98.404	95.655	82.584	92.414		Class 1	6.48324
TGME49_240060	hypothetical protein	89.363	86.071	70.771	84.824	86.301	68.035		Class 1	6.48161
TGME49_314430	serine/threonine specific protein phosphatase	89.097	88.604	84.574	86.212	96.521	83.666		Class 1	6.4773
TGME49_257380	hypothetical protein	89.084	95.56	92.827	86.869	89.192	91.369		Class 1	6.47709
TGME49_278450	hypothetical protein	89.006	95.043	89.952	87.96	89.08	88.245		Class 1	6.47583
TGME49_246130	serpin (serine proteinase inhibitor) superfamily protein	88.685	88.19	78.935	84.278	89.143	86.952		Class 1	6.47062
TGME49_238150	hypothetical protein	88.329	90.967	91.653	90.3	83.785	94.207		Class 1	6.46482
TGME49_269340	hypothetical protein	88.317	88.888	100.435	96.421	87.634	97.126		Class 1	6.46462
TGME49_279100	hypothetical protein	87.987	78.881	88.586	85.302	78.694	86.614		Class 1	6.45922
TGME49_310040	ubiquitin conjugating enzyme E2, putative	87.821	97.507	96.019	93.11	87.476	92.523		Class 1	6.45649
TGME49_294290	Der1ER1	87.704	92.395	88.228	80.968	90.684	91.218		Class 1	6.45457
TGME49_203740	hypothetical protein	87.641	94.023	106.153	95.855	81.891	101.735		Class 1	6.45353
TGME49_230180	hypothetical protein	87.614	82.093	72.845	78.565	73.14	75.46		Class 1	6.45309
TGME49_226590	cytochrome C oxidase subunit IIa, putative	87.39	86.197	90.174	88.563	87.196	91.133		Class 1	6.4494
TGME49_309740	LSM domain-containing protein	87.329	86.566	85.539	85.9	93.546	87.826		Class 1	6.44839
TGME49_263850	hypothetical protein	87.277	93.893	75.723	89.192	80.528	74.207		Class 1	6.44753
TGME49_269010	AP2 domain transcription factor AP2VIII-7	87.224	86.769	79.807	82.998	92.164	75.939		Class 1	6.44665
TGME49_203930	hypothetical protein	87.071	81.17	88.791	84.291	79.713	87.784		Class 1	6.44412
TGME49_222220	alveolin domain containing intermediate filament IMC7	87.016	91.807	81.345	93.403	96.38	81.582		Class 1	6.44321
TGME49_231410	hypothetical protein	86.865	98.375	91.393	89.364	91.057	94.336		class 2	6.4407
TGME49_214320	facilitative glucose transporter GT1	86.802	85.325	81.521	85.36	84.804	78.05		class 2	6.43966
TGME49_232440	Brf1p family coiled coil protein	86.774	85.941	89.605	89.478	87.887	89.414		class 2	6.43919
TGME49_211710	TB2/DP1, HVA22 family protein	86.772	84.867	85.577	90.29	87.358	86.953		class 2	6.43916
TGME49_235150	transporter, major facilitator family protein	86.754	81.365	91.472	86.574	82.363	90.871		class 2	6.43886
TGME49_279390	proliferation-associated protein 2G4, putative	86.658	92.315	82.615	88.982	91.447	78.482		class 2	6.43726
TGME49_202830	Elicitor-responsive protein, putative	86.477	83.9	84.007	84.875	80.847	82.843		class 2	6.43424
TGME49_247220	nudix -type motif 9 isoform a family protein	86.258	80.336	75.575	84.635	76.991	74.586		class 2	6.43059
TGME49_269970	hypothetical protein	86.247	88.509	87.38	93.872	86.691	88.242		class 2	6.4304
TGME49_218550	PIK3R4 kinase-related protein	86.18	85.364	78.027	81.94	90.226	77.466		class 2	6.42928
TGME49_234530	hypothetical protein	86.081	81.261	88.76	84.576	76.677	85.271		class 2	6.42762
TGME49_278510	protein phosphatase 2C domain-containing protein	86.021	81.589	92.206	84.54	77.074	88.667		class 2	6.42662
TGME49_320020	transporter, major facilitator family protein	85.807	82.613	78.888	82.844	80.118	73.101		class 2	6.42302
TGME49_232550	hypothetical protein	85.585	84.567	100.219	82.817	76.552	95.987		class 2	6.41929
TGME49_214790	glycoprotein	85.257	90.19	78.109	91.852	90.779	77.017		class 2	6.41375
TGME49_254470	hypothetical protein	85.177	82.364	79.426	83.192	83.439	78.167		class 2	6.41239
TGME49_301440	calcium-dependent protein kinase CDPK1	84.953	81.755	75.521	80.281	83.417	75.26		class 2	6.40859
TGME49_231950	hypothetical protein	84.863	85.991	94.119	87.793	83.941	89.546		class 2	6.40706
TGME49_283800	hypothetical protein	84.65	76.336	86.581	88.147	78.791	82.269		class 2	6.40344
TGME49_255900	Bax inhibitor-1, putative	84.622	78.473	89.061	78.614	73.575	84.764		class 2	6.40296
TGME49_227970	histone family DNA-binding protein	84.416	84.64	94.551	85.26	80.448	90.643		class 2	6.39944
TGME49_220950	hypothetical protein	84.253	80.116	86.128	80.249	81.921	80.729		class 2	6.39666
TGME49_227910	hypothetical protein	84.153	88.284	84.267	90.18	85.714	86.857		class 2	6.39494
TGME49_260180	hypothetical protein	84.04	82.213	83.486	89.323	77.92	85.587		class 2	6.393
TGME49_279430	cwf18 pre-mRNA splicing factor protein	83.89	88.507	104.529	86.842	94.167	96.352		class 2	6.39043
TGME49_271260	hypothetical protein	83.886	84.434	87.482	81.233	89.778	82.488		class 2	6.39036
TGME49_209950	thioredoxin, putative	83.856	82.883	86.966	88.075	84.365	87.536		class 2	6.38984
TGME49_233140	deoxyuridine 5'-triphosphate nucleotidohydrolase, putative	83.757	91.234	92.014	83.758	74.812	95.225		class 2	6.38814
TGME49_286470	AGC kinase	83.567	83.953	79.038	80.124	79.883	79.91		class 2	6.38486
TGME49_217951	hypothetical protein	83.216	65.746	69.525	72.278	69.413	67.759		class 2	6.37879
TGME49_263630	hypothetical protein	83.02	92.428	86.173	82.999	79.342	87.301		class 2	6.37539
TGME49_258360	hypothetical protein	82.83	82.411	89.578	85.257	76.825	90.348		class 2	6.37208
TGME49_247460	proliferating cell nuclear antigen PCNA1	82.672	82.968	84.392	86.848	85.149	82.695		class 2	6.36933
TGME49_254030	zinc finger CDGSH-type domain-containing protein	82.649	84.493	78.412	80.148	83.798	86.059		class 2	6.36893
TGME49_225120	hypothetical protein	82.07	73.146	73.446	81.656	71.429	72.604		class 2	6.35878
TGME49_273770	hypothetical protein	81.43	86.927	85.031	85.048	83.32	83.703		class 2	6.34749
TGME49_312600	heat shock protein HSP21	81.302	83.392	81.041	84.001	77.01	75.893		class 2	6.34522
TGME49_278990	phosphate carrier, putative	81.055	81.195	83.995	87.458	81.327	87.496		class 2	6.34083
TGME49_318430	malate dehydrogenase MDH	80.955	79.812	90.229	84.849	80.757	92.498		class 2	6.33905
TGME49_311430	fibrillarin	80.764	86.664	76.148	81.066	88.693	78.138		class 2	6.33564
TGME49_216080	apical complex lysine methyltransferase	80.679	79.91	76.327	81.506	83.376	73.203		class 2	6.33412
TGME49_269980	preprotein translocase Sec61, putative	80.608	80.679	87.448	81.497	80.833	84.754		class 2	6.33285
TGME49_200700	Toxoplasma gondii family C protein	80.33	88.483	80.702	80.682	71.114	89.798		class 2	6.32787
TGME49_236630	hypothetical protein	80.2	84.821	73.606	79.25	75.916	74.785		class 2	6.32553
TGME49_300100	rhoptry neck protein RON2	80.001	74.527	78.778	79.485	81.55	79.645		class 2	6.32195
TGME49_289210	prefoldin subunit protein	79.783	83.856	78.732	90.738	80.327	82.425		class 2	6.31801
TGME49_313560	60S ribosomal protein L7a, putative	79.637	82.904	70.142	82.363	86.051	78.255		class 2	6.31537
TGME49_316710	hypothetical protein	79.324	82.055	77.052	73.537	77.199	78.796		class 2	6.30969
TGME49_289920	hypothetical protein	79.22	76.772	71.055	75.891	72.008	72.248		class 2	6.30779
TGME49_227335	hypothetical protein	79.041	82.474	90.954	79.333	73.083	91.011		class 2	6.30453
TGME49_200010	hypothetical protein	78.856	91.061	79.715	80.671	87.912	78.599		class 2	6.30115
TGME49_207240	hypothetical protein	78.64	78.814	76.841	79.992	77.051	84.187		class 2	6.29719
TGME49_244690	hypothetical protein	78.406	78.677	77.31	77.664	74.13	78.549		class 2	6.29289
TGME49_251780	heat shock protein	78.258	80.026	76.058	77.589	83.015	72.611		class 2	6.29017
TGME49_224850	polyadenylate binding protein, putative	78.246	77.742	73.318	74.74	80.834	72.871		class 2	6.28995
TGME49_248740	hypothetical protein	78.134	78.522	71.595	75.351	83.072	69.649		class 2	6.28788
TGME49_267350	LSM domain-containing protein	77.948	81.356	69.236	81.49	80.478	70.036		class 2	6.28444
TGME49_262720	eukaryotic initiation factor-1A, putative	77.851	89.371	82.204	78.424	79.087	80.089		class 2	6.28264
TGME49_221590	dual specificity phosphatase, catalytic domain-containing protein	77.847	80.693	68.445	69.449	79.21	64.165		class 2	6.28257
TGME49_230940	hypothetical protein	77.56	80.916	71.859	72.951	85.489	71.021		class 2	6.27724
TGME49_306190	hypothetical protein	77.553	74.249	73.545	78.251	76.252	71.188		class 2	6.27711
TGME49_223010	hypothetical protein	77.131	80.601	83	81	72.828	90.727		class 2	6.26924
TGME49_203790	hypothetical protein	77.02	76.709	89.997	78.083	75.055	84.178		class 2	6.26716
TGME49_247410	hypothetical protein	76.968	86.81	74.604	77.388	79.943	70.946		class 2	6.26619
TGME49_269420	hypothetical protein	76.947	70.521	73.97	75.392	85.814	67.304		class 2	6.26579
TGME49_223410	eukaryotic initiation factor-4E, putative	76.857	74.915	72.584	79.391	70.685	74.993		class 2	6.2641
TGME49_252500	polo kinase	76.468	74.041	78.57	76.036	70.355	81.156		class 2	6.25678
TGME49_258940	acylphosphatase family protein	76.459	74.459	74.28	84.427	71.385	77.962		class 2	6.25661
TGME49_225160	hypothetical protein	76.061	76.275	63.97	70.938	71.078	65.346		class 2	6.24909
TGME49_260240	ccr4-associated factor family protein	76.03	71.438	74.08	74.058	78.405	74.053		class 2	6.2485
TGME49_258462	hypothetical protein	75.895	67.033	70.037	79.1	57.162	68.293		class 2	6.24593
TGME49_277920	hypothetical protein	75.852	68.628	70.726	76.846	73.181	70.952		class 2	6.24512
TGME49_300285	hypothetical protein	75.779	77.646	67.88	84.63	74.881	72.01		class 2	6.24373
TGME49_246490	hypothetical protein	75.621	76.398	78.745	72.761	70.46	77.666		class 2	6.24072
TGME49_202620	hypothetical protein	75.613	76.245	69.281	72.61	76.65	70.796		class 2	6.24056
TGME49_203560	hypothetical protein	75.554	61.241	70.256	66.738	69.534	66.218		class 2	6.23944
TGME49_314080	hypothetical protein	75.539	79.524	67.946	75.18	78.272	63.065		class 2	6.23915
TGME49_210420	hypothetical protein	75.248	73.927	78.807	77.508	72.514	80.626		class 2	6.23358
TGME49_257685	hypothetical protein	74.988	79.132	70.802	71.946	77.583	71.651		class 2	6.22859
TGME49_295630	hypothetical protein	74.98	73.116	78.188	75.013	72.468	81.103		class 2	6.22843
TGME49_290040	macrophage migration inhibitory factor, putative	74.704	79.187	74.165	74.69	71.799	77.175		class 2	6.22311
TGME49_293270	hypothetical protein	74.624	73.166	68.507	70.69	77.692	62.601		class 2	6.22157
TGME49_268200	RNA recognition motif-containing protein	74.343	72.357	80.868	70.369	82.562	77.104		class 2	6.21613
TGME49_236580	Prp31-15.5k-U4 Snrna Complex family protein	74.156	75.398	70.259	70.708	69.982	69.73		class 2	6.21249
TGME49_282070	hypothetical protein	73.917	71.42	71.924	69.739	72.167	68.401		class 2	6.20783
TGME49_261240	histone H3	73.799	89.727	69.925	100.61	127.94	93.079		class 2	6.20553
TGME49_313230	eukaryotic initiation factor-2, alpha subunit	73.646	75.971	67.688	73.284	81.217	68.525		class 2	6.20254
TGME49_226020	transporter, major facilitator family protein	73.627	70.201	66.977	70.485	69.547	65.487		class 2	6.20216
TGME49_295450	sjoegren syndrome nuclear autoantigen 1 family protein	73.586	72.11	80.829	75.618	73.952	76.353		class 2	6.20136
TGME49_316540	IMC sub-compartment protein ISP3	73.573	80.174	75.35	78.39	76.681	78.468		class 2	6.2011
TGME49_236910	U2 snRNP auxiliary factor, putative	73.515	77.333	74.37	78.704	73.852	76.274		class 2	6.19997
TGME49_260370	AtPH1 family protein	73.444	72.411	76.021	73.666	66.463	76.841		class 2	6.19857
TGME49_265450	hexokinase	73.409	77.858	82.005	74.047	75.889	82.691		class 2	6.19789
TGME49_237150	minor histocompatibility antigen h13, putative	73.278	73.14	70.163	75.787	75.867	69.656		class 2	6.19531
TGME49_293760	EF hand domain-containing protein	73.149	65.786	62.976	70.977	68.005	61.045		class 2	6.19277
TGME49_255420	hypothetical protein	72.988	77.546	68.729	65.415	70.628	68.689		class 2	6.18959
TGME49_223000	dynein light chain DLC	72.937	74.129	79.274	73.853	70.457	81.524		class 2	6.18858
TGME49_320220	ubiquinol cytochrome c oxidoreductase, putative	72.839	73.874	74.288	76.287	74.665	76.053		class 2	6.18664
TGME49_216650	S15 sporozoite-expressed protein	72.73	71.208	68.873	70.622	67.053	67.671		class 2	6.18448
TGME49_229930	p25-alpha family protein	72.262	67.581	61.902	66.693	61.645	58.409		class 2	6.17517
TGME49_227650	microtubule-associated protein RP/EB family, putative	71.843	68.687	73.077	66.596	64.054	66.678		class 2	6.16678
TGME49_259700	hypothetical protein	71.837	68.925	71.335	71.274	66.094	72.762		class 2	6.16666
TGME49_301250	hypothetical protein	71.755	67.742	70.536	73.063	68.369	66.481		class 2	6.16501
TGME49_257520	synaptobrevin protein	71.732	77.392	74.377	73.801	71.369	75.977		class 2	6.16454
TGME49_270350	hypothetical protein	71.59	70.849	78.455	75.802	73.16	83.008		class 2	6.16169
TGME49_224060	thioredoxin, putative	71.542	74.92	71.474	70.622	78.242	69.584		class 2	6.16072
TGME49_214840	AP2 domain transcription factor AP2X-7	71.413	70.915	61.972	65.292	79.803	58.607		class 2	6.15811
TGME49_223070	hypothetical protein	71.34	68.802	75.222	73.471	71	80.396		class 2	6.15664
TGME49_285250	hypothetical protein	71.339	69.758	66.779	67.713	72.149	63.417		class 2	6.15662
TGME49_311240	DnaJ family chaperone, putative	71.286	69.724	68.939	72.502	73.62	62.31		class 2	6.15555
TGME49_260825	hypothetical protein	71.286	63.341	59.745	67.985	67.914	67.449		class 2	6.15555
TGME49_280460	AP2 domain transcription factor AP2VIIa-2	71.191	63.395	72.359	68.482	68.313	70.505		class 2	6.15362
TGME49_214950	hypothetical protein	71.159	69.932	68.892	72.234	71.624	67.887		class 2	6.15297
TGME49_245450	hypothetical protein	71.009	75.66	75.177	79.408	74.971	80.341		class 2	6.14993
TGME49_264600	hypothetical protein	70.824	73.833	79.066	71.691	65.968	76.505		class 2	6.14617
TGME49_286580	hypothetical protein	70.579	70.146	61.857	64.667	70.656	55.874		class 2	6.14117
TGME49_200375	hypothetical protein	70.446	64.566	70.287	75.41	72.751	60.912		class 2	6.13845
TGME49_279360	hypothetical protein	70.268	70.478	74.334	71.73	67.817	68.273		class 2	6.1348
TGME49_204340	hypothetical protein	70.082	62.675	64.902	66.251	65.503	62.803		class 2	6.13097
TGME49_213050	hypothetical protein	70.061	90.109	62.213	72.908	80.692	62.27		class 2	6.13054
TGME49_318660	PP2C, putative	69.932	64.2	67.411	67.302	65.432	67.394		class 2	6.12788
TGME49_297960	rhoptry neck protein RON6	69.917	65.829	70.415	68.399	70.249	68.498		class 2	6.12757
TGME49_285240	3-oxo-5-alpha-steroid 4-dehydrogenase	69.851	74.637	71.806	69.966	72.413	72.1		class 2	6.12621
TGME49_310010	rhoptry neck protein RON1	69.767	65.943	71.478	68.633	66.506	67.129		class 2	6.12447
TGME49_460730	18S ribosomal RNA	69.746	78.217	104.659	50.355	117.122	211.812		class 2	6.12404
TGME49_258390	DnaJ protein, putative	69.641	69.842	72.147	72.945	67.387	69.473		class 2	6.12187
TGME49_223530	hypothetical protein	69.461	62.814	68.196	67.622	59.459	69.476		class 2	6.11813
TGME49_268680	hypothetical protein	69.433	66.479	69.074	66.965	64.93	66.107		class 2	6.11755
TGME49_220240	hypothetical protein	69.424	67.433	69.603	69.441	68.329	65.269		class 2	6.11736
TGME49_305290	vacuolar atp synthase subunit e, putative	69.382	69.574	74.357	69.067	67.589	69.207		class 2	6.11649
TGME49_209250	hypothetical protein	69.356	68.66	67.413	68.291	70.95	67.483		class 2	6.11595
TGME49_214880	hypothetical protein	69.201	67.317	65.484	67.07	70.848	65.044		class 2	6.11272
TGME49_276930	hypothetical protein	69.187	61.181	63.733	70.62	62.626	65.221		class 2	6.11243
TGME49_311840	hypothetical protein	69.174	67.635	72.793	68.439	68.373	73.769		class 2	6.11216
TGME49_259260	membrane protein FtsH1	69.146	64.262	66.762	69.252	67.124	67.885		class 2	6.11157
TGME49_232000	hypothetical protein	69.005	71.666	66.397	68.922	70.573	61.076		class 2	6.10863
TGME49_309730	thioredoxin reductase	68.911	78.334	79.08	70.717	73.533	78.236		class 2	6.10666
TGME49_205280	hypothetical protein	68.84	65.134	68.432	66.154	65.723	68.637		class 2	6.10518
TGME49_201785	hypothetical protein	68.787	66.19	56.888	64.757	71.185	56.176		class 2	6.10406
TGME49_200290	rhomboid protease ROM1	68.783	70.298	73.006	69.155	66.415	70.621		class 2	6.10398
TGME49_284630	hypothetical protein	68.748	89.223	64.848	73.042	68.303	59.805		class 2	6.10325
TGME49_241820	membrane protein, putative	68.712	66.478	69.639	69.264	65.696	65.298		class 2	6.10249
TGME49_235370	hypothetical protein	68.695	65.391	68.843	66.836	66.785	64.284		class 2	6.10213
TGME49_273090	cell division protein CDC48CY	68.542	68.511	68.198	71.202	71.337	68.094		class 2	6.09892
TGME49_242090	zinc finger (CCCH type) motif-containing protein	68.464	59.921	63.223	64.444	62.926	61.922		class 2	6.09727
TGME49_234190	serine hydroxymethyltransferase 2, putative	68.374	61.579	71.602	67.997	62.747	68.218		class 2	6.09538
TGME49_223040	hypothetical protein	68.243	71.771	73.119	74.014	68.83	72.866		class 2	6.09261
TGME49_235540	eukaryotic initiation factor-2 beta, putative	68.105	68.798	65.382	69.794	66.708	65.903		class 2	6.08969
TGME49_201520	protein phosphatase 2C domain-containing protein	67.787	63.405	79.455	66.921	59.099	72.222		class 2	6.08294
TGME49_290660	RNA recognition motif-containing protein	67.711	68.592	58.248	68.827	71.551	60.007		class 2	6.08132
TGME49_316270	Rab geranylgeranyl transferase type II beta subunit, putative	67.562	71.251	69.926	69.835	63.739	66.467		class 2	6.07814
TGME49_321530	cathepsin CPL	67.521	63.002	65.117	66.793	63.835	65.194		class 2	6.07726
TGME49_274060	2-oxoglutarate/malate translocase OMT	67.359	67.859	71.411	67.666	69.507	69.165		class 2	6.0738
TGME49_254900	proteasome subunit beta type 2, putative	67.314	74.474	72.559	70.98	78.551	77.334		class 2	6.07283
TGME49_200310	hypothetical protein	67.256	63.543	69.141	66.72	65.956	66.564		class 2	6.07159
TGME49_245485	microneme protein MIC9	67.158	76.881	62.057	63.942	65.53	65.926		class 2	6.06949
TGME49_207420	hypothetical protein	67.126	69.99	75.448	77.583	69.736	73.89		class 2	6.0688
TGME49_236920	hypothetical protein	66.956	74.377	66.287	68.144	72.408	67.907		class 2	6.06514
TGME49_279400	glutaredoxin, putative	66.945	73.828	81.846	72.192	67.841	79.184		class 2	6.0649
TGME49_256760	pyruvate kinase PyK1	66.945	67.669	62.584	66.527	68.627	61.192		class 2	6.0649
TGME49_309752	succinate-Coenzyme A ligase, beta subunit, putative	66.89	68.121	62.911	66.486	69.066	60.785		class 2	6.06372
TGME49_270170	hypothetical protein	66.841	62.133	68.925	64.089	59.448	67.095		class 2	6.06266
TGME49_218740	membrane protein, putative	66.711	70.77	68.333	57.721	60.932	66.922		class 2	6.05985
TGME49_249300	hypothetical protein	66.45	67.843	56.322	61.462	63.044	52.18		class 2	6.0542
TGME49_209420	hypothetical protein	66.389	70.865	70.351	70.813	70.245	69.264		class 2	6.05287
TGME49_254690	phospholipase/carboxylesterase	66.181	68.907	60.904	61.615	66.391	59.862		class 2	6.04835
TGME49_266366	BT1 family protein	66.1	65.219	56.107	63.521	71.619	54.497		class 2	6.04658
TGME49_283790	protein kinase, putative	66.076	59.334	67.882	69.23	70.631	68.515		class 2	6.04605
TGME49_323300	myosin-light-chain kinase	65.692	57.694	66.501	59.772	55.082	61.247		class 2	6.03765
TGME49_240600	chaperonin cpn60, putative	65.565	65.976	69.424	70.471	65.001	67.776		class 2	6.03485
TGME49_211420	RNA recognition motif-containing protein	65.517	68.105	60.393	66.221	66.713	57.341		class 2	6.0338
TGME49_223110	glycolipid transfer protein GLTP	65.363	69.211	67.114	65.23	65.675	68.76		class 2	6.0304
TGME49_279410	hypothetical protein	65.25	66.321	70.037	69.534	65.81	64.847		class 2	6.02791
TGME49_284180	hypothetical protein	65.098	56.211	59.415	61.129	60.45	58.44		class 2	6.02454
TGME49_457480	28S ribosomal RNA	65.028	89.944	120.823	63.475	127.125	205.128		class 2	6.02299
TGME49_288750	ubiquinol-cytochrome c reductase	64.962	66.663	61.289	71.083	69.166	63.452		class 2	6.02152
TGME49_278600	hypothetical protein	64.951	67.535	68.614	69.883	63.146	71.538		class 2	6.02128
TGME49_277720	GDA1/CD39 (nucleoside phosphatase) family protein	64.923	63.928	66.331	64.403	64.008	64.478		class 2	6.02066
TGME49_225930	triose-phosphate isomerase TPI-I	64.747	68.766	65.671	67.159	61.752	64.844		class 2	6.01674
TGME49_224900	adenylate kinase, putative	64.65	65.018	66.858	67.637	62.765	63.892		class 2	6.01458
TGME49_248370	prefoldin subunit 6, putative	64.629	70.631	60.252	66.896	65.603	67.738		class 2	6.01411
TGME49_314400	pyruvate dehydrogenase E1 component, beta subunit, putative	64.449	70.694	66.144	64.577	68.162	66.719		class 2	6.01009
TGME49_262970	hypothetical protein	64.446	45.587	72.694	60.213	49.437	67.172		class 2	6.01002
TGME49_201260	sugar transporter ST3	64.355	59.475	63.558	58.981	58.716	61.189		class 2	6.00798
TGME49_260520	hypothetical protein	64.322	52.862	53.699	54.049	60.322	51.164		class 2	6.00724
TGME49_248445	hypothetical protein	64.316	67.598	57.477	60.585	64.307	59.058		class 2	6.00711
TGME49_226500	hypothetical protein	64.31	69.104	66.904	72.42	58.926	66.86		class 2	6.00697
TGME49_236010	prenylcysteine oxidase	64.263	61.368	67.813	60.737	57.646	61.666		class 2	6.00592
TGME49_289620	cathepsin CPC1	64.183	61.608	56.903	56.188	61.687	57.694		class 2	6.00412
TGME49_230410	peroxiredoxin PRX3	64.14	68.738	63.106	68.944	65.575	64.174		class 2	6.00315
TGME49_214440	4'-phosphopantetheinyl transferase superfamily protein	64.129	60.635	59.153	61.369	60.962	58.737		class 2	6.00291
TGME49_316330	superoxide dismutase SOD2	64.034	67.584	58.743	58.568	63.328	60.369		class 2	6.00077
TGME49_250340	centrin 2	64.005	67.603	69.558	65.07	62.735	67.6		class 2	6.00011
TGME49_214290	DJ-1 family protein	63.994	65.802	62.655	66.116	61.736	65.807		class 2	5.99986
TGME49_229000	kelch repeat-containing protein	63.99	66.24	58.677	62.501	64.617	57.88		class 2	5.99977
TGME49_214100	hypothetical protein	63.967	63.467	62.613	63.615	65.561	63.645		class 2	5.99926
TGME49_237190	hypothetical protein	63.828	64.13	62.974	67.935	63.862	63.05		class 2	5.99612
TGME49_213410	small nuclear ribonucleoprotein f (snrnp-f), putative	63.718	68.282	63.354	70.059	67.652	67.715		class 2	5.99363
TGME49_213030	hypothetical protein	63.7	65.08	67.628	66.81	65.771	66.392		class 2	5.99322
TGME49_224520	alveolin domain containing intermediate filament IMC8	63.673	59.07	60.536	63.249	58.208	60.441		class 2	5.99261
TGME49_307830	hypothetical protein	63.631	66.284	51.027	64.338	61.786	51.359		class 2	5.99166
TGME49_244160	transcription initiation factor TFIID complex subunit TAF12	63.384	69.106	56.243	94.728	79.609	77.806		class 2	5.98605
TGME49_237820	IMC sub-compartment protein ISP2	63.373	66.333	59.796	61.024	56.979	62.089		class 2	5.9858
TGME49_205350	integral membrane protein, GNS1/SUR4 family protein, putative	63.354	65.632	63.995	64.242	64.786	63.199		class 2	5.98536
TGME49_310235	hypothetical protein	63.328	69.329	66.17	63.622	62.83	66.272		class 2	5.98477
TGME49_316600	hypothetical protein	63.243	64.489	60.537	65.236	62.207	64.579		class 2	5.98283
TGME49_252390	hypothetical protein	63.21	58.423	57.12	64.91	56.765	58.057		class 2	5.98208
TGME49_269840	proteasome regulatory subunit	63.017	66.522	65.959	65.251	62.263	66.111		class 2	5.97767
TGME49_230970	hypothetical protein	62.721	64.409	60.031	57.296	56.428	57.206		class 2	5.97088
TGME49_284540	ATP synthase F1, delta subunit protein	62.716	67.374	65.965	62.967	68.258	62.141		class 2	5.97076
TGME49_262560	hypothetical protein	62.671	58.944	62.685	62.67	57.146	58.003		class 2	5.96973
TGME49_286480	hypothetical protein	62.4	70.253	65.027	70.516	70.101	61.845		class 2	5.96347
TGME49_308980	hypothetical protein	62.268	61.779	56.344	59.655	60.227	55.104		class 2	5.96042
TGME49_249970	hypothetical protein	62.252	57.484	58.505	59.546	59.444	56.31		class 2	5.96005
TGME49_293720	hypothetical protein	61.955	62.476	56.944	58.975	60.349	59.628		class 2	5.95315
TGME49_239752	hypothetical protein	61.953	56.982	68.752	68.308	63.581	65.348		class 2	5.9531
TGME49_271790	hypothetical protein	61.863	62.003	61.226	64.56	56.739	65.048		class 2	5.951
TGME49_204400	ATPase synthase subunit alpha, putative	61.69	68.122	63.363	64.368	66.985	61.714		class 2	5.94696
TGME49_312150	hypothetical protein	61.531	64.445	68.798	66.1	62.128	63.998		class 2	5.94324
TGME49_306390	hypothetical protein	61.309	64.102	62.609	63.414	65.261	64.639		class 2	5.93803
TGME49_244440	nucleoside transporter protein	61.281	68.253	49.384	59.926	70.062	48.771		class 2	5.93737
TGME49_305510	hypothetical protein	61.199	61.016	68.091	60.537	56.778	64.82		class 2	5.93544
TGME49_237200	sphingolipid delta 4 desaturase/c-4 hydroxylase protein des2 family protein	61.131	66.335	65.776	65.135	66.474	69.179		class 2	5.93383
TGME49_215150	AP2 domain transcription factor AP2X-9	60.799	58.114	60.875	61.393	61.803	55.364		class 2	5.92598
TGME49_247550	heat shock protein HSP60	60.507	66.196	55.844	63.183	64.835	55.206		class 2	5.91903
TGME49_266100	rhoptry kinase family protein ROP41	60.289	64.522	64.222	57.126	56.452	64.239		class 2	5.91382
TGME49_267610	hypothetical protein	60.031	53.735	62.769	62.518	57.5	57.752		class 2	5.90764
TGME49_269140	transport protein particle component, Bet3 domain-containing protein	59.868	54.467	70.718	62.854	58.489	70.487		class 2	5.90371
TGME49_252630	hypothetical protein	59.78	63.207	62.33	63.786	56.789	62.096		class 2	5.90159
TGME49_245550	hypothetical protein	59.703	61.71	59.971	54.258	52.931	56.31		class 2	5.89973
TGME49_294870	universal stress family protein	59.691	54.7	57.545	56.289	60.209	56.75		class 2	5.89944
TGME49_202840	FHA domain-containing protein	59.625	57.655	58.093	58.338	61.122	56.046		class 2	5.89785
TGME49_314310	hypothetical protein	59.324	62.917	54.887	60.229	53.586	52.871		class 2	5.89054
TGME49_221470	hypothetical protein	59.249	56.81	63.739	58.89	54.773	63.739		class 2	5.88872
TGME49_209720	hypothetical protein	59.112	64.241	66.556	59.962	62.601	65.673		class 2	5.88538
TGME49_255450	hypothetical protein	58.982	59.955	53.043	57.415	59.038	52.52		class 2	5.8822
TGME49_203390	CRAL/TRIO domain-containing protein	58.923	64.433	57.27	63.732	60.663	58.682		class 2	5.88076
TGME49_210810	hypothetical protein	58.893	64.781	60.655	58.289	59.351	61.321		class 2	5.88002
TGME49_226250	DEAD (Asp-Glu-Ala-Asp) box polypeptide DDX3X	58.879	57.299	53.523	58.95	60.618	52.118		class 2	5.87968
TGME49_242070	cAMP-dependent protein kinase regulatory subunit	58.868	59.106	54.764	59.097	58.414	54.154		class 2	5.87941
TGME49_226040	EF hand domain-containing protein	58.868	60.591	64.932	61.288	55.177	61.927		class 2	5.87941
TGME49_225320	hypothetical protein	58.736	59.925	65.13	57.801	59.66	66.101		class 2	5.87617
TGME49_262010	calmodulin CAM2	58.569	63.084	60.586	58.606	56.122	57.244		class 2	5.87207
TGME49_286720	heat shock protein HSP28	58.564	56.075	60.925	60.68	61.753	62.116		class 2	5.87194
TGME49_225790	PDI family protein	58.531	62.634	61.896	55.431	60.588	62.786		class 2	5.87113
TGME49_272380	hypothetical protein	58.527	58.588	51.766	55.169	58.698	51.401		class 2	5.87103
TGME49_246930	calmodulin CAM1	58.263	65.554	58.847	65.678	67.591	64.093		class 2	5.86451
TGME49_270320	protein phosphatase 2C domain-containing protein	58.19	55.934	53.503	54.637	57.151	54.615		class 2	5.8627
TGME49_222948	hypothetical protein	58.165	52.531	58.865	56.76	58.111	57.175		class 2	5.86208
TGME49_209945	hypothetical protein	58.013	69.237	67.082	84.955	73.734	67.124		class 2	5.8583
TGME49_212210	hypothetical protein	57.941	54.923	56.736	54.87	52.669	50.449		class 2	5.85651
TGME49_213590	hypothetical protein	57.927	60.465	59.373	56.542	56.489	59.018		class 2	5.85616
TGME49_240640	casein kinase I	57.911	57.667	53.998	58.603	59.127	52.99		class 2	5.85577
TGME49_294340	hypothetical protein	57.763	57.764	48.665	56.847	57.003	51.187		class 2	5.85207
TGME49_291930	RNA recognition motif-containing protein	57.76	65.195	50.436	58.326	66.259	51.975		class 2	5.852
TGME49_217550	hypothetical protein	57.738	61.249	61.209	62.837	57.81	62.515		class 2	5.85145
TGME49_311680	FUN14 family protein	57.574	58.163	62.076	59.871	53.609	60.959		class 2	5.84735
TGME49_223690	hypothetical protein	57.378	60.501	56.717	58.593	67.554	58.581		class 2	5.84243
TGME49_201380	chorismate synthase, putative	57.286	65.926	49.013	52.855	64.724	47.313		class 2	5.84011
TGME49_294640	ribonucleoside-diphosphate reductase large chain	57.249	58.658	63.086	60.096	61.165	60.16		class 2	5.83918
TGME49_202770	RNA recognition motif-containing protein	57.029	57.795	57.978	54.343	57.397	58.319		class 2	5.83362
TGME49_313080	hypothetical protein	56.988	52.594	56.398	59.408	53.747	56.508		class 2	5.83259
TGME49_240590	DNA-directed RNA polymerase II RPB5	56.929	58.492	61.387	57.276	56.415	58.445		class 2	5.83109
TGME49_218240	hypothetical protein	56.842	55.17	62.723	58.786	58.731	59.304		class 2	5.82889
TGME49_216230	hypothetical protein	56.841	54.564	57.328	59.528	58.646	58.4		class 2	5.82886
TGME49_313530	transmembrane protein 167, putative	56.334	60.531	62.287	61.616	62.631	64.727		class 2	5.81593
TGME49_306280	mediator complex subunit MED7	56.257	59.741	57.547	59.881	50.261	56.333		class 2	5.81396
TGME49_244190	hypothetical protein	56.217	53.997	56.763	55.351	59.004	54.946		class 2	5.81293
TGME49_219170	hypothetical protein	56.112	61.545	55.464	55.747	61.156	53.627		class 2	5.81024
TGME49_253470	alveolin domain containing intermediate filament IMC13	56.101	59.353	62.596	56.126	54.564	57.982		class 2	5.80995
TGME49_290670	leucyl aminopeptidase LAP	56.073	55.413	62.566	57.679	52.49	56.844		class 2	5.80923
TGME49_285290	hypothetical protein	55.958	51.678	57.756	53.721	58.779	59.015		class 2	5.80627
TGME49_238100	transmembrane protein	55.952	55.092	54.114	58.679	59.838	58.489		class 2	5.80612
TGME49_289680	Ras-related protein Rab11	55.945	54.649	52.227	56.72	56.791	55.006		class 2	5.80594
TGME49_296121	hypothetical protein	55.872	50.555	58.241	50.902	48.793	55.859		class 2	5.80405
TGME49_261440	ARM repeats containing protein	55.751	55.814	50.166	54.076	54.669	49.698		class 2	5.80093
TGME49_306060	rhoptry neck protein RON8	55.53	54.366	54.946	52.953	58.952	50.909		class 2	5.7952
TGME49_213610	hypothetical protein	55.496	46.062	50.149	54.32	51.903	49.246		class 2	5.79431
TGME49_286770	hypothetical protein	55.289	59.976	57.696	64.434	59.655	56.478		class 2	5.78892
TGME49_232280	hypothetical protein	55.251	55.321	50.218	54.611	55.217	53.363		class 2	5.78793
TGME49_266640	Acetyl-coenzyme A synthetase 2, putative	55.074	56.003	56.992	49.11	52.941	53.255		class 2	5.7833
TGME49_282180	hypothetical protein	55.063	58.21	59.729	57.578	58.694	60.025		class 2	5.78301
TGME49_214770	small GTP binding protein rab1a, putative	54.992	56.071	60.73	59.964	57.425	60.473		class 2	5.78115
TGME49_261070	apicoplast triosephosphate translocator APT1	54.985	48.318	46.347	49.598	55.488	51.007		class 2	5.78097
TGME49_293340	ran binding family protein 1, putative	54.973	59.733	56.458	59.644	55.358	59.139		class 2	5.78065
TGME49_279420	hypothetical protein	54.691	51.752	55.177	52.415	55.989	53.413		class 2	5.77323
TGME49_254365	phosphatidate cytidylyltransferase	54.621	62.342	56.219	58.33	57.828	61.055		class 2	5.77138
TGME49_311470	rhoptry neck protein RON5	54.512	53.042	52.778	51.892	57.815	49.955		class 2	5.7685
TGME49_283780	glucose-6-phosphate isomerase GPI	54.51	56.716	51.823	50.918	53.281	52.533		class 2	5.76845
TGME49_224530	alveolin domain containing intermediate filament IMC5	54.395	54.661	49.533	52.69	51.319	47.826		class 2	5.7654
TGME49_258930	peptidylprolyl isomerase	54.33	63.254	57.822	55.311	58.825	53.135		class 2	5.76368
TGME49_273130	SAG-related sequence SRS30A	54.326	54.004	71.994	57.766	54.598	70.314		class 2	5.76357
TGME49_297340	hypothetical protein	54.3	48.493	56.744	51.969	50.911	51.27		class 2	5.76288
TGME49_261230	ankyrin repeat-containing protein	54.291	50.763	47.871	50.997	55.36	46.799		class 2	5.76264
TGME49_222840	Ser/Thr phosphatase family protein	54.192	52.266	54.329	53.357	50.259	56.587		class 2	5.76001
TGME49_326800	S-Adenosyl homocysteine hydrolase	54.069	57.407	52.684	53.176	59.115	51.48		class 2	5.75673
TGME49_263080	hypothetical protein	53.901	59.351	56.678	54.527	56.503	56.883		class 2	5.75224
TGME49_240490	hypothetical protein	53.887	51.21	56.887	64.877	57.265	62.359		class 2	5.75187
TGME49_263720	HMG (high mobility group) box domain-containing protein	53.812	55.847	54.582	50	54.969	56.795		class 2	5.74986
TGME49_311100	zinc finger (CCCH type) motif-containing protein	53.728	49.662	44.59	49.009	53.123	36.487		class 2	5.7476
TGME49_222930	hypothetical protein	53.698	57.809	55.456	52.894	55.615	55.071		class 2	5.7468
TGME49_228230	hypothetical protein	53.644	51.857	58.691	53.52	56.02	56.34		class 2	5.74534
TGME49_229420	cytochrome c, putative	53.218	53.177	55.193	53.772	56.867	61.232		class 2	5.73384
TGME49_247510	fructose-bisphospatase II	53.166	49.785	49.297	51.781	47.387	52.285		class 2	5.73243
TGME49_200385	Myb family DNA-binding domain-containing protein	53.115	48.694	49.93	47.823	51.696	45.013		class 2	5.73105
TGME49_258540	phosphoglycerate mutase family protein	53.11	48.41	50.429	48.441	52.397	46.851		class 2	5.73091
TGME49_232760	protein phosphatase inhibitor IPP2	53.107	57.814	48.388	55.449	57.531	51.682		class 2	5.73083
TGME49_230850	hypothetical protein	53.088	54.792	52.259	49.822	54.288	49.778		class 2	5.73031
TGME49_269690	hypothetical protein	53.054	51.021	45.119	51.911	53.951	44.644		class 2	5.72939
TGME49_249780	hypothetical protein	53.053	55.228	52.268	55.272	57.161	52.743		class 2	5.72936
TGME49_251500	eukaryotic initiation factor-3, subunit 3, putative	52.817	53.1	47.647	53.217	55.399	46.768		class 2	5.72293
TGME49_248280	hypothetical protein	52.804	56.323	50.839	51.444	58.171	50.395		class 2	5.72258
TGME49_280480	EF hand domain-containing protein	52.678	52.646	61.107	53.024	51.512	61.076		class 2	5.71913
TGME49_313780	hypothetical protein	52.664	55.017	53.027	55.626	57.374	53.018		class 2	5.71875
TGME49_258458	hypothetical protein	52.599	40.634	47.124	53.534	41.39	47.153		class 2	5.71696
TGME49_255190	myosin C	52.592	50.652	45.111	51.013	51.96	43.122		class 2	5.71677
TGME49_217540	RNA recognition motif-containing protein	52.556	51.074	51.238	50.811	52.39	48.685		class 2	5.71578
TGME49_225730	membrane protein, putative	52.484	53.119	56.38	59.626	56.814	57.504		class 2	5.71381
TGME49_249670	cathepsin B	52.381	54.7	52.191	51.391	55.653	51.249		class 2	5.71097
TGME49_263130	citrate synthase, putative	52.372	46.561	45.54	48.596	44.736	44.765		class 2	5.71072
TGME49_246540	cytochrome c1, heme protein	52.336	56.374	55.34	57.202	54.636	55.351		class 2	5.70973
TGME49_211850	hypothetical protein	52.304	55.72	52.258	55.407	60.113	49.189		class 2	5.70885
TGME49_251690	seryl-tRNA synthetase, cytoplasmic, putative	52.275	51.848	52.281	55.709	57.673	48.823		class 2	5.70805
TGME49_228290	phospholipase/carboxylesterase	52.262	56.806	52.651	55.49	58.603	54.507		class 2	5.70769
TGME49_207170	hypothetical protein	52.243	52.63	52.417	52.198	53.561	52.969		class 2	5.70717
TGME49_319640	hypothetical protein	52.138	52.363	51.434	49.461	51.541	48.753		class 2	5.70426
TGME49_305330	cyclin, N-terminal domain-containing protein	51.995	47.123	50.279	51.553	50.679	46.408		class 2	5.7003
TGME49_321590	hypothetical protein	51.989	53.173	59.855	51.456	45.617	63.115		class 2	5.70013
TGME49_203060	hypothetical protein	51.944	55.073	44.646	47.253	54.023	41.291		class 2	5.69889
TGME49_461350	28S ribosomal RNA	51.816	70.523	90.509	47.504	92.114	161.298		class 2	5.69533
TGME49_221990	hypothetical protein	51.686	55.1	60.018	50.749	53.149	53.372		class 2	5.6917
TGME49_237250	hypothetical protein	51.638	51.194	56.552	55.966	52.152	55.404		class 2	5.69036
TGME49_235340	hypothetical protein	51.391	48.091	45.229	48.632	45.807	44.252		class 2	5.68344
TGME49_243465	hypothetical protein	51.383	42.801	47.425	56.477	52.604	42.382		class 2	5.68322
TGME49_306930	proteasome subunit beta type 7 precursor, putative	51.359	50.996	53.784	49.669	50.903	53.584		class 2	5.68255
TGME49_240690	S-adenosyl methionine synthetase	51.279	54.217	46.858	49.484	54.87	49.604		class 2	5.6803
TGME49_261540	DNA-directed RNA polymerase I RPAC2	51.194	61.574	45.784	47.842	51.045	44.599		class 2	5.6779
TGME49_293310	ribosomal protein L20, putative	51.141	61.181	55.809	58.66	61.885	50.506		class 2	5.67641
TGME49_241010	K+ channel tetramerisation domain-containing protein	51.13	57.301	55.689	54.179	55.341	57.35		class 2	5.6761
TGME49_230820	hypothetical protein	51.061	49.887	50.044	50.944	50.961	47.462		class 2	5.67415
TGME49_236960	transporter, major facilitator family protein	51.03	54.298	55.95	53.243	51.432	57.448		class 2	5.67327
TGME49_207400	hypothetical protein	51.025	49.722	46.171	51.644	46.859	46.62		class 2	5.67313
TGME49_270830	small nuclear ribonucleoprotein	50.974	52.646	50.082	53.184	47.762	50.188		class 2	5.67169
TGME49_227580	transmembrane amino acid transporter protein	50.941	43.7	52.567	49.216	43.121	49.608		class 2	5.67076
TGME49_246485	hypothetical protein	50.894	51.123	49.787	50.773	44.861	44.655		class 2	5.66942
TGME49_209890	hypothetical protein	50.855	49.616	51.636	49.684	48.01	48.821		class 2	5.66832
TGME49_205670	SF-assemblin/beta giardin protein	50.85	50.502	53.054	51.609	49.187	52.444		class 2	5.66818
TGME49_315930	integral membrane protein, DUF56 family protein, putative	50.833	54.004	50.637	55.179	55.451	55.137		class 2	5.66769
TGME49_201760	hypothetical protein	50.796	52.649	54.288	50.486	46.918	54.268		class 2	5.66664
TGME49_210255	hypothetical protein	50.782	55.485	51.586	59.744	53.889	53.071		class 2	5.66625
TGME49_239420	protein kinase	50.756	45.524	47.936	46.804	47.822	45.497		class 2	5.66551
TGME49_248270	zinc finger (CCCH type) motif-containing protein	50.751	50.923	46.071	48.06	51.01	41.505		class 2	5.66536
TGME49_253880	GNS1/SUR4 family protein	50.731	50.127	54.382	51.109	52.692	54.353		class 2	5.6648
TGME49_300055	hypothetical protein	50.731	41.919	51.275	46.908	41.078	47.347		class 2	5.6648
TGME49_241155	hypothetical protein	50.711	55.035	55.633	56.031	52.14	48.715		class 2	5.66423
TGME49_212300	hypothetical protein	50.674	46.349	48.793	50.907	47.799	44.924		class 2	5.66317
TGME49_289380	hypothetical protein	50.627	47.449	47.722	52.194	50.971	46.078		class 2	5.66184
TGME49_216810	5'-nucleotidase, C-terminal domain-containing protein	50.49	48.239	49.07	50.729	50.838	44.525		class 2	5.65793
TGME49_248670	V-type H(+)-translocating pyrophosphatase VP1	50.489	47.318	49.791	46.701	49.212	48.583		class 2	5.6579
TGME49_293470	hypothetical protein	50.431	53.944	54.815	50.014	50.042	55.137		class 2	5.65624
TGME49_310150	AMP-binding enzyme domain-containing protein	50.358	54.46	57.186	54.634	53.24	57.194		class 2	5.65415
TGME49_229360	transaldolase	50.341	48.759	49.796	51.614	47.963	51.094		class 2	5.65366
TGME49_240250	macro domain-containing protein	50.291	48.211	55.806	49.68	47.646	53.225		class 2	5.65223
TGME49_239500	proteasome subunit alpha type, putative	50.281	50.679	55.013	54.966	45.952	55.199		class 2	5.65194
TGME49_323330	hypothetical protein	50.154	50.679	51.336	50.238	49.846	51.368		class 2	5.64829
TGME49_213570	hypothetical protein	50.151	58.169	51.859	51.372	56.104	50.085		class 2	5.64821
TGME49_299780	hypothetical protein	50.023	46.767	41.953	43.92	46.541	39.56		class 2	5.64452
TGME49_206480	hypothetical protein	49.958	52.392	45.704	49.491	51.039	48.488		class 2	5.64264
TGME49_238380	hypothetical protein	49.945	48.051	46.091	49.327	48.527	45.236		class 2	5.64227
TGME49_305060	CAP-Gly domain-containing protein	49.92	46.38	52.582	50.85	49.613	52.014		class 2	5.64155
TGME49_249935	hypothetical protein	49.887	52.047	55.918	52.959	49.065	59.418		class 2	5.64059
TGME49_228170	inner membrane complex protein IMC2A	49.672	45.064	41.611	48.356	45.488	39.823		class 2	5.63436
TGME49_203820	hypothetical protein	49.486	48.305	52.442	47.729	49.154	48.805		class 2	5.62895
TGME49_259550	dihydropteroate synthase	49.45	48.749	52.37	50.017	47.994	48.495		class 2	5.6279
TGME49_203600	hypothetical protein	49.409	45.176	50.081	49.876	45.932	48.057		class 2	5.6267
TGME49_248460	ubiquitin, putative	49.343	49.074	48.937	49.409	46.276	46.17		class 2	5.62477
TGME49_263180	myosin D	49.279	49.64	46.001	45.731	49.386	43.806		class 2	5.6229
TGME49_301420	hypothetical protein	49.197	50.37	48.809	46.817	50.475	46.301		class 2	5.6205
TGME49_232830	vacuolar proton translocating ATPase subunit A, putative	49.16	49.169	49.07	47.946	45.68	45.023		class 2	5.61941
TGME49_311230	hypothetical protein	49.144	46.07	40.726	46.227	53.679	39.826		class 2	5.61894
TGME49_225050	adenosylhomocysteinase, putative	49.141	51.931	48.577	52.072	52.788	47.542		class 2	5.61886
TGME49_280670	hypothetical protein	49.141	46.714	47.674	46.308	49.262	46.499		class 2	5.61886
TGME49_254606	hypothetical protein	49.113	58.442	49.221	51.469	57.986	56.27		class 2	5.61803
TGME49_310070	methyltransferase, putative	48.933	49.416	50.862	51.772	50.264	49.254		class 2	5.61274
TGME49_232750	23S rRNA (adenine(1618)-N(6))-methyltransferase, putative	48.777	47.794	47.842	45.35	47.473	44.679		class 2	5.60813
TGME49_229280	hypothetical protein	48.747	49.129	44.109	51.307	52.279	45.596		class 2	5.60724
TGME49_261970	hypothetical protein	48.642	46.501	46.253	43.876	47.562	41.572		class 2	5.60413
TGME49_288630	nucleosome assembly protein (NAP), putative	48.543	51.17	48.539	54.931	49.956	49.366		class 2	5.60119
TGME49_216450	peptidase, T1 family protein	48.427	47.384	53.785	54.636	48.754	52.979		class 2	5.59774
TGME49_236540	RNA recognition motif-containing protein	48.381	46.812	44.286	49.081	47.831	42.944		class 2	5.59637
TGME49_273930	DNA topoisomerase domain-containing protein	48.37	51.73	49.797	48.728	49.627	47.441		class 2	5.59604
TGME49_222850	stress responsive a/b barrel domain-containing protein	48.298	55.53	51.324	54.318	50.247	50.664		class 2	5.59389
TGME49_206340	hypothetical protein	48.195	48.623	46.528	51.49	48.966	47.339		class 2	5.59081
TGME49_310750	emp24/gp25L/p24 family protein	48.058	46.065	52.341	48.081	51.964	51.606		class 2	5.5867
TGME49_300048	hypothetical protein	48.057	44.766	49.003	43.691	43.808	44.248		class 2	5.58667
TGME49_207820	cell-cycle-associated protein kinase MAPK, putative	48.039	42.313	49.65	45.114	46.667	46.906		class 2	5.58613
TGME49_280710	20S proteasome subunit beta 7, putative	47.997	47.543	45.077	46.25	44.896	45.622		class 2	5.58487
TGME49_209700	hypothetical protein	47.872	52.27	54.018	49.919	41.236	52.916		class 2	5.58111
TGME49_248880	GTPase RAB7	47.811	43.643	54.722	50.399	45.994	56.028		class 2	5.57927
TGME49_290005	proteasome subunit beta type 1, putative	47.802	49.165	50.317	50.238	49.728	52.097		class 2	5.579
TGME49_266890	hypothetical protein	47.709	45.723	48.593	44.353	48.839	45.184		class 2	5.57619
TGME49_225940	hypothetical protein	47.681	48.013	46.429	46.976	44.866	47.448		class 2	5.57534
TGME49_211250	hypothetical protein	47.679	44.714	48.423	47.222	43.838	48.914		class 2	5.57528
TGME49_249425	hypothetical protein	47.675	48.541	39.722	46.046	48.452	39.888		class 2	5.57516
TGME49_216770	hypothetical protein	47.574	51.758	52.476	55.674	50.809	48.577		class 2	5.5721
TGME49_315220	rhoptry protein ROP14	47.571	44.084	52.704	49.478	45.592	49.774		class 2	5.57201
TGME49_232720	Lsm12, putative	47.539	46.974	52.836	52.585	49.534	49.483		class 2	5.57104
TGME49_216730	MCM2/3/5 family protein	47.526	47.021	45.365	47.27	45.812	44.716		class 2	5.57065
TGME49_237170	hypothetical protein	47.369	56.222	53.442	40.646	48.76	44.82		class 2	5.56587
TGME49_245640	hypothetical protein	47.328	47.908	48.217	45.468	46.378	45.704		class 2	5.56462
TGME49_211720	AP2 domain transcription factor AP2IV-5	47.325	43.26	44.986	45.354	50.274	45.894		class 2	5.56453
TGME49_244110	nucleosome assembly protein (nap) protein	47.175	48.825	45.171	49.065	48.687	46.548		class 2	5.55995
TGME49_205180	RNA recognition motif-containing protein	47.156	50.261	46.958	47.028	49.022	46.775		class 2	5.55937
TGME49_218730	hypothetical protein	47.155	44.959	48.417	48.549	48.525	44.694		class 2	5.55934
TGME49_232600	phospholipase, patatin family protein	47.128	41.802	53.508	47.999	48.8	50.872		class 2	5.55851
TGME49_205650	AP2 domain transcription factor AP2VIIa-3	47.089	42.726	49.595	47.145	45.233	47.093		class 2	5.55732
TGME49_280375	hypothetical protein	46.947	43.251	43.133	41.76	42.577	38.036		class 2	5.55296
TGME49_237090	AP2 domain transcription factor AP2X-5	46.937	39.933	50.512	47.351	42.167	45.386		class 2	5.55265
TGME49_271030	AP2 domain transcription factor AP2VIII-6	46.759	48.182	46.843	45.864	51.368	44.08		class 2	5.54717
TGME49_225690	hypothetical protein	46.739	44.223	43.827	44.156	47.455	40.324		class 2	5.54655
TGME49_240560	MAPEG family protein	46.697	48.123	44.288	45.453	46.315	43.401		class 2	5.54526
TGME49_315950	zinc finger, C3HC4 type (RING finger) domain-containing protein	46.683	45.591	41.563	44.53	49.949	38.367		class 2	5.54483
TGME49_245540	hypothetical protein	46.674	43.429	47.433	48.459	45.289	48.3		class 2	5.54455
TGME49_233470	hypothetical protein	46.672	43.13	47.988	47.299	43.119	48.018		class 2	5.54449
TGME49_263530	chaperonin, putative	46.642	48.633	49.472	50.663	51.703	53.215		class 2	5.54356
TGME49_289830	eukaryotic initiation factor-3, delta subunit, putative	46.545	47.432	43.387	46.495	46.529	44.781		class 2	5.54055
TGME49_262480	dynein light chain roadblock-type 2, putative	46.522	46.446	45.399	46.584	46.035	49.928		class 2	5.53984
TGME49_268178	hypothetical protein	46.509	38.099	42.311	38.187	39.517	39.787		class 2	5.53944
TGME49_243950	prohibitin, putative	46.159	46.574	44.552	47.956	46.476	45.485		class 2	5.52854
TGME49_294670	translation initiation factor 3 subunit	46.072	50.686	44.068	46.546	50.067	48.92		class 2	5.52582
TGME49_251470	hypothetical protein	46.043	40.895	40.943	46.518	45.435	44.907		class 2	5.52491
TGME49_304740	rhoptry kinase family protein ROP35	46.024	42.699	36.779	44.661	44.19	37.56		class 2	5.52431
TGME49_214350	GTP-binding protein, putative	45.974	53.092	51.086	49.291	52.165	49.569		class 2	5.52275
TGME49_273460	eukaryotic translation initiation factor 3 subunit 6 interacting protein	45.916	45.602	43.732	46.418	46.597	42.144		class 2	5.52093
TGME49_253100	hypothetical protein	45.898	46.821	45.255	45.423	50.98	45.302		class 2	5.52036
TGME49_205690	hypothetical protein	45.826	49.17	47.402	43.729	45.446	47.061		class 2	5.51809
TGME49_310390	hypothetical protein	45.819	41.532	44.806	41.234	41.517	42.672		class 2	5.51787
TGME49_237560	iron-sulfur cluster protein ISCU	45.81	47.443	46.491	48.51	45.522	49.448		class 2	5.51759
TGME49_205490	integral membrane protein, putative	45.762	44.086	43.796	45.072	45.664	45.413		class 2	5.51608
TGME49_246340	DnaJ domain-containing protein	45.626	46.343	40.599	44.907	46.701	40.274		class 2	5.51178
TGME49_265420	hypothetical protein	45.59	49.076	45.328	44.427	44.602	46.216		class 2	5.51065
TGME49_290980	glycine C-acetyltransferase, putative	45.414	39.552	42.092	45.515	41.789	39.728		class 2	5.50507
TGME49_249180	bifunctional dihydrofolate reductase-thymidylate synthase	45.327	71.76	143.118	47.854	71.484	140.664		class 2	5.5023
TGME49_289720	hypothetical protein	45.313	42.53	51.084	47.296	47.673	48.837		class 2	5.50185
TGME49_315770	cytochrome p450 superfamily protein	45.261	43.821	52.585	43.946	44.437	50.758		class 2	5.5002
TGME49_295620	hypothetical protein	45.231	41.964	49.687	43.399	43.219	46.546		class 2	5.49924
TGME49_269730	myosin-light-chain kinase	45.23	39.624	47.648	43.862	39.976	45.389		class 2	5.49921
TGME49_310240	hypothetical protein	45.195	49.184	50.161	46.347	48.85	47.787		class 2	5.49809
TGME49_218960	AP2 domain transcription factor AP2XII-1	45.157	41.664	44.347	40.921	47.903	41.051		class 2	5.49688
TGME49_224020	hypothetical protein	45.127	43.362	44.95	42.373	40.11	43.427		class 2	5.49592
TGME49_261710	ankyrin repeat-containing protein	45.084	40.015	42.472	41.828	41.648	46.627		class 2	5.49454
TGME49_315470	hypothetical protein	45.012	44.28	45.61	44.508	43.417	44.234		class 2	5.49224
TGME49_310360	hypothetical protein	44.983	45.857	47.802	48.846	50.511	46.114		class 2	5.49131
TGME49_317720	eukaryotic translation initiation factor 3 subunit 7, putative	44.972	43.441	42.326	44.475	44.833	41.835		class 2	5.49096
TGME49_289800	hypothetical protein	44.961	39.732	42.105	41.957	46.694	44.776		class 2	5.4906
TGME49_309160	IgA-specific metalloendopeptidase	44.951	47.64	45.75	43.124	51.939	42.71		class 2	5.49028
TGME49_269920	phosphatidylserine decarboxylase	44.945	41.457	48.443	44.423	42.657	45.401		class 2	5.49009
TGME49_310440	membrane occupation and recognition nexus protein MORN1	44.941	47.007	44.986	48.388	44.009	44.012		class 2	5.48996
TGME49_262040	SAC3/GANP family protein	44.915	48.524	44.477	49.901	49.195	45.81		class 2	5.48913
TGME49_315510	hypothetical protein	44.783	46.733	46.527	44.765	46.09	47.339		class 2	5.48488
TGME49_271610	pyrroline-5-carboxylate reductase	44.707	45.65	41.775	43.678	44.525	40.608		class 2	5.48243
TGME49_219520	histone arginine methyltransferase PRMT1	44.705	48.099	41.273	47.57	48.14	42.251		class 2	5.48236
TGME49_215425	hypothetical protein	44.668	44.58	41.147	44.013	48.377	43.148		class 2	5.48117
TGME49_285510	hypothetical protein	44.666	45.083	44.707	49.831	47.244	46.084		class 2	5.48111
TGME49_292920	heat shock protein 75, putative	44.649	42.659	42.842	44.269	40.707	43.803		class 2	5.48056
TGME49_301890	Toxoplasma gondii family B protein	44.616	39.698	43.489	45.32	38.018	44.836		class 2	5.47949
TGME49_231180	hypothetical protein	44.61	44.132	45.447	43.16	44.463	43.954		class 2	5.4793
TGME49_224000	hypothetical protein	44.525	42.206	40.139	42.321	45.486	41.55		class 2	5.47654
TGME49_240630	ULK kinase	44.43	48.659	54.264	49.259	45.582	51.457		class 2	5.47346
TGME49_313273	hypothetical protein	44.362	42.625	40.169	41.623	44.162	44.32		class 2	5.47125
TGME49_219800	vacuolar ATP synthase subunit b, putative	44.137	42.053	38.998	40.7	42.402	38.44		class 2	5.46392
TGME49_310180	hypothetical protein	44.124	44.21	40.931	46.167	43.529	46.153		class 2	5.46349
TGME49_319850	splicing factor U2AF family SnRNP auxilary factor large subunit, RRM domain-containing protein	43.931	41.918	41.751	46.785	44.859	41.491		class 2	5.45717
TGME49_240960	AIG2 family protein	43.746	51.375	47.309	40.949	52.483	47.339		class 2	5.45108
TGME49_204370	WD-40 repeat protein	43.74	44.897	46.41	46.667	42.263	49.162		class 2	5.45088
TGME49_242570	hypothetical protein	43.704	42.55	41.584	41.198	40.671	42.433		class 2	5.44969
TGME49_278050	proteasome subunit alpha type 1, putative	43.652	46.047	44.34	45.787	44.537	46.152		class 2	5.44798
TGME49_295105	rhoptry protein, putative	43.632	19.723	41.609	30.479	32.753	17.07		class 2	5.44731
TGME49_231070	protein kinase	43.452	44.409	47.278	40.561	47.232	45.398		class 2	5.44135
TGME49_259660	orotate phosphoribosyltransferase	43.407	47.434	45.562	46.26	46.658	46.925		class 2	5.43986
TGME49_242000	DUF51 family protein	43.33	49.241	46.232	44.016	47.996	45.413		class 2	5.43729
TGME49_230190	hypothetical protein	43.311	43.042	42.943	44.368	45.736	43.393		class 2	5.43666
TGME49_290600	succinyl-CoA-synthetase alpha SCSA	43.168	44.329	47.132	48.924	47.393	46.721		class 2	5.43189
TGME49_264770	hypothetical protein	43.136	44.357	43.602	43.839	44.401	43.512		class 2	5.43082
TGME49_255410	hypothetical protein	43.035	42.404	44.672	43.993	42.197	45.23		class 2	5.42744
TGME49_229220	hypothetical protein	42.899	42.029	45.601	47.293	41.757	47.508		class 2	5.42287
TGME49_240570	hypothetical protein	42.836	43.281	42.944	40.988	40.025	41.471		class 2	5.42075
TGME49_314820	atp synthase F1, epsilon subunit, putative	42.761	43.957	43.467	46.252	43.278	51.759		class 2	5.41822
TGME49_314790	small nuclear ribonucleoprotein G, putative	42.741	48.877	40.492	46.386	46.948	41.509		class 2	5.41755
TGME49_321620	dynamin-related protein DRPB	42.552	42.245	45.405	43.208	42.183	43.516		class 2	5.41116
TGME49_257350	eukaryotic translation initiation factor, putative	42.305	41.475	40.482	42.042	42.524	39.517		class 2	5.40276
TGME49_283850	peptidyl-prolyl cis-trans isomerase	42.274	44.54	41.267	43.954	44.396	39.726		class 2	5.4017
TGME49_218780	phosphoserine aminotransferase, putative	42.231	47.414	47.425	44.157	43.124	46.321		class 2	5.40023
TGME49_299970	tetratricopeptide repeat-containing protein	42.216	43.124	40.751	42.439	42.296	42.007		class 2	5.39972
TGME49_297120	hypothetical protein	42.209	40.99	48.556	40.992	41.18	47.688		class 2	5.39948
TGME49_277740	zinc finger, C3HC4 type (RING finger) domain-containing protein	42.206	40.373	39.483	39.676	44.362	39.548		class 2	5.39938
TGME49_229500	hypothetical protein	42.202	36.715	40.954	40.597	43.502	40.789		class 2	5.39924
TGME49_301400	hypothetical protein	42.163	39.895	38.357	38.229	44.242	35.994		class 2	5.39791
TGME49_267080	26S protease regulatory subunit 4, putative	42.113	45.45	42.546	44.493	43.115	42.924		class 2	5.39619
TGME49_287210	proteasome subunit alpha2, protease of the acylase family and NTN hydrolase fold, putative	42.111	42.929	44.179	44.374	41.847	45.123		class 2	5.39613
TGME49_208550	hypothetical protein	41.975	43.989	41.212	45.539	44.446	37.748		class 2	5.39146
TGME49_248810	nuclear factor NF7	41.865	47.211	46.095	40.476	48.532	47.654		class 3	5.38767
TGME49_226000	ATP synthase, putative	41.825	41.855	43.696	43.299	45.861	40.5		class 3	5.38629
TGME49_296015	hypothetical protein	41.82	40.742	48.961	47.319	37.543	46.461		class 3	5.38612
TGME49_202510	multi-pass transmembrane protein	41.817	41.126	44.169	38.981	39.739	44.89		class 3	5.38602
TGME49_314500	subtilisin SUB2	41.725	38.53	35.264	39.092	40.963	35.393		class 3	5.38284
TGME49_285980	glucosephosphate-mutase GPM1	41.676	41.803	43.76	39.973	39.011	40.935		class 3	5.38114
TGME49_261010	tat-binding family protein, putative	41.661	46.555	43.482	41.914	44.175	42.535		class 3	5.38063
TGME49_215520	hypothetical protein	41.565	38.5	39.105	39.23	37.626	38.299		class 3	5.3773
TGME49_250115	hypothetical protein	41.489	42.263	32.359	39.509	41.258	31.946		class 3	5.37466
TGME49_214540	hypothetical protein	41.48	50.104	52.738	43.048	46.294	48.827		class 3	5.37434
TGME49_227960	PCI domain-containing protein	41.477	42.909	45.264	45.565	42.074	44.631		class 3	5.37424
TGME49_225540	hypothetical protein	41.458	34.742	34.905	38.488	34.571	32.907		class 3	5.37358
TGME49_246560	vacuolar ATP synthase subunit g, putative	41.44	41.738	39.362	41.894	40.565	39.893		class 3	5.37295
TGME49_253130	transporter, major facilitator family protein	41.39	35.254	44.293	39.699	37.581	43.088		class 3	5.37121
TGME49_213800	protein phosphatase 2b regulatory subunit, putative	41.367	42.367	40.982	40.807	43.686	38.281		class 3	5.37041
TGME49_311890	hypothetical protein	41.361	41.412	41.328	43.074	41.163	45.908		class 3	5.3702
TGME49_277685	hypothetical protein	41.332	45.06	45.633	41.9	42.753	48.353		class 3	5.36919
TGME49_267580	cyclin2 related protein	41.3	36.813	34.895	35.762	40.218	28.659		class 3	5.36807
TGME49_219310	DnaK family protein	41.259	42.242	38.806	39.387	44.473	38.066		class 3	5.36664
TGME49_202860	hypothetical protein	41.215	41.532	41.85	42.953	41.035	42.292		class 3	5.3651
TGME49_304500	hypothetical protein	41.183	34.624	36.055	38.888	32.786	34.833		class 3	5.36398
TGME49_213730	lanthionine synthetase C family protein	41.18	45.764	36.905	44.459	43.699	42.592		class 3	5.36387
TGME49_313010	DEAD (Asp-Glu-Ala-Asp) box polypeptide DDX6	41.126	40.512	40.164	39.824	41.818	38.977		class 3	5.36198
TGME49_260540	alveolin domain containing intermediate filament IMC14	40.979	38.711	33.021	39.936	40.284	34.658		class 3	5.35681
TGME49_266900	cyclin, N-terminal domain-containing protein	40.904	36.995	44.024	40.268	33.95	47.659		class 3	5.35417
TGME49_216410	hypothetical protein	40.86	44.709	34.249	41.845	38.838	39.929		class 3	5.35262
TGME49_242380	fatty acid elongase	40.819	41.634	38.762	39.364	40.058	41.021		class 3	5.35117
TGME49_223660	50S ribosomal protein L4, putative	40.778	40.32	43.776	40.297	38.502	42.761		class 3	5.34972
TGME49_279380	hypothetical protein	40.649	39.583	39.626	41.393	40.468	40.031		class 3	5.34515
TGME49_265510	hypothetical protein	40.636	46.496	42.447	43.916	47.753	41.304		class 3	5.34469
TGME49_205380	fructose-bisphospatase I	40.634	37.785	41.132	43.237	39.131	39.901		class 3	5.34462
TGME49_226290	hypothetical protein	40.58	46.266	39.597	41.155	44.876	41.913		class 3	5.3427
TGME49_225490	calcium-dependent protein kinase CDPK2	40.477	35.24	40.029	39.721	38.848	39.016		class 3	5.33903
TGME49_275650	hypothetical protein	40.446	47.526	33.222	39.842	52.533	38.365		class 3	5.33793
TGME49_273320	hypothetical protein	40.395	36.704	33.387	37.88	37.234	33.911		class 3	5.3361
TGME49_305080	hypothetical protein	40.341	38.824	37.566	39.41	37.618	34.457		class 3	5.33417
TGME49_207680	suppressor of kinetochore protein 1, putative	40.287	40.286	38.845	38.504	41.272	43.613		class 3	5.33224
TGME49_202940	hypothetical protein	40.203	37.748	42.244	41.348	39.146	41.666		class 3	5.32923
TGME49_305270	hypothetical protein	40.172	41.086	41.544	40.493	42.883	42.093		class 3	5.32812
TGME49_289540	hypothetical protein	40.116	37.803	33.302	37.036	39.595	33.723		class 3	5.32611
TGME49_235970	eukaryotic initiation factor-2 gamma, putative	40.053	42.945	36.733	41.034	41.455	35.164		class 3	5.32384
TGME49_315780	myosin regulatory light chain, putative	39.969	39.922	38.656	39.668	36.005	40.778		class 3	5.32081
TGME49_290030	hypothetical protein	39.959	43.294	40.339	42.94	44.179	42.614		class 3	5.32045
TGME49_288030	hypothetical protein	39.888	43.279	45.236	40.771	37.961	39.532		class 3	5.31788
TGME49_260600	Pumilio-family RNA binding repeat-containing protein	39.816	34.618	34.532	39.036	38.119	32.826		class 3	5.31528
TGME49_201810	hypothetical protein	39.784	36.641	43.068	39.738	41.799	39.161		class 3	5.31412
TGME49_228980	hypothetical protein	39.778	36.582	39.378	38.885	45.228	41.774		class 3	5.3139
TGME49_230070	BolA family protein	39.699	41.498	40.42	41.869	41.15	35.448		class 3	5.31103
TGME49_255245	hypothetical protein	39.684	40.378	38.862	45.234	48.577	39.91		class 3	5.31049
TGME49_293900	sporozoite protein with an altered thrombospondin repeat SPATR	39.671	37.125	36.691	37.697	37.787	36.711		class 3	5.31001
TGME49_271960	hypothetical protein	39.661	42.368	43.043	41.495	40.581	43.415		class 3	5.30965
TGME49_233230	RNA-binding protein 8A family protein	39.659	42.891	39.358	40.905	41.766	39.474		class 3	5.30958
TGME49_227290	histone deacetylase HDAC3	39.644	38.097	37.69	40.585	39.015	38.203		class 3	5.30903
TGME49_244700	NAD(+)/NADH kinase domain-containing protein	39.641	39.792	36.459	38.235	44.175	35.643		class 3	5.30892
TGME49_226550	TBC domain containing protein	39.64	43.202	42.122	44.501	38.963	39.65		class 3	5.30889
TGME49_271270	hypothetical protein	39.625	41.545	43.337	39.46	41.603	41.701		class 3	5.30834
TGME49_312640	hypothetical protein	39.52	41.685	41.204	39.054	41.557	40.114		class 3	5.30451
TGME49_219810	hypothetical protein	39.485	43.049	37.339	39.675	40.036	36.932		class 3	5.30323
TGME49_226730	aconitate hydratase ACN/IRP	39.478	40.215	38.182	38.541	40.817	33.331		class 3	5.30298
TGME49_270880	RNA recognition motif-containing protein	39.448	36.399	36.877	39.955	39.049	35.367		class 3	5.30188
TGME49_286650	hypothetical protein	39.448	37.382	39.331	38.392	36.874	38.077		class 3	5.30188
TGME49_269438	hypothetical protein	39.39	41.89	39.762	38.8	40.568	41.666		class 3	5.29976
TGME49_285710	hypothetical protein	39.359	38.336	42.323	42.378	37.671	41.2		class 3	5.29862
TGME49_209170	hypothetical protein	39.323	37.185	37.483	41.154	37.093	41.758		class 3	5.2973
TGME49_221675	hypothetical protein	39.191	40.011	40.768	36.436	44.116	37.705		class 3	5.29245
TGME49_280518	hypothetical protein	39.137	39.127	37.536	38.557	38.748	35.828		class 3	5.29046
TGME49_249010	hypothetical protein	39.127	43.132	43.625	40.487	41.417	38.143		class 3	5.29009
TGME49_203030	N-methyl-D-aspartate receptor-associated protein	39.11	39.999	37.189	38.419	40.643	36.494		class 3	5.28947
TGME49_239490	dehydrogenase E1 component family protein	39.054	39.45	39.62	41.763	40.157	37.372		class 3	5.2874
TGME49_315290	hypothetical protein	38.971	37.733	34.562	37.028	40.286	33.231		class 3	5.28433
TGME49_307020	hypothetical protein	38.953	42.557	36.036	36.876	34.156	36.174		class 3	5.28366
TGME49_220500	UBX domain-containing protein	38.909	39.381	37.53	39.037	39.876	37.767		class 3	5.28203
TGME49_293580	prefoldin subunit protein	38.894	40.595	39.047	40.917	40.05	40.793		class 3	5.28148
TGME49_232340	protein phosphatase 2C domain-containing protein	38.826	36.505	34.939	40.519	38.381	31.168		class 3	5.27895
TGME49_241310	hypothetical protein	38.798	36.141	39.406	40.005	39.77	44.035		class 3	5.27791
TGME49_243910	Cof family hydrolase subfamily protein	38.779	38.447	41.123	42.506	39.331	42.377		class 3	5.2772
TGME49_459740	18S ribosomal RNA	38.727	39.197	54.156	30.952	65.964	103.539		class 3	5.27527
TGME49_254603	hypothetical protein	38.71	36.03	39.351	37.636	36.871	42.975		class 3	5.27463
TGME49_254600	ubiquitin family protein	38.703	41.489	36.581	31.98	41.622	36.899		class 3	5.27437
TGME49_320740	hypothetical protein	38.7	41.055	50.778	38.196	39.611	52.392		class 3	5.27426
TGME49_275670	alveolin domain containing intermediate filament IMC15	38.695	37.866	38.406	37.321	38.881	37.045		class 3	5.27408
TGME49_323110	hypothetical protein	38.552	39.524	36.614	35.868	37.521	36.44		class 3	5.26873
TGME49_238950	fatty acyl-CoA desaturase, putative	38.542	34.022	40.411	38.211	35.735	39.216		class 3	5.26836
TGME49_216820	transporter, major facilitator family protein	38.503	37.217	35.51	36.845	35.757	31.691		class 3	5.2669
TGME49_242290	proteasome subunit alpha1, putative	38.435	39.282	42.271	38.916	39.72	41.47		class 3	5.26435
TGME49_311260	myosin light chain MLC1, putative	38.36	37.025	37.822	39.064	35.044	41.608		class 3	5.26153
TGME49_277680	hypothetical protein	38.3	38.3	39.773	38.37	37.381	38.265		class 3	5.25927
TGME49_211015	hypothetical protein	38.291	42.151	44.373	41.12	42.226	42.252		class 3	5.25893
TGME49_231990	hypothetical protein	38.228	35.53	36.31	38.645	37.925	39.713		class 3	5.25656
TGME49_308810	rhoptry neck protein RON9	38.224	34.882	37.838	36.568	37.93	38.573		class 3	5.25641
TGME49_206695	hypothetical protein	38.171	36.144	35.815	38.797	37.801	35.664		class 3	5.25441
TGME49_313180	cell-cycle-associated protein kinase PRP4, putative	38.162	36.642	38.705	38.629	37.112	35.318		class 3	5.25406
TGME49_262920	trypsin domain-containing protein	38.149	35.81	37.656	38.333	38.118	36.74		class 3	5.25357
TGME49_312950	hypothetical protein	38.072	35.378	48.103	42.585	33.266	49.297		class 3	5.25066
TGME49_290150	hypothetical protein	38.07	35.612	40.88	38.101	38.757	43.741		class 3	5.25058
TGME49_283510	hypothetical protein	37.98	7.266	6.163	36.782	6.333	6.547		class 3	5.24717
TGME49_208718	protein tyrosine phosphatase type IVA A, putative	37.909	39.894	31.607	38.862	40.959	34.325		class 3	5.24447
TGME49_318380	hypothetical protein	37.9	35.023	34.612	36.183	39.428	35.852		class 3	5.24413
TGME49_243600	acetyltransferase, GNAT family protein	37.838	33.547	34.717	36.944	31.897	35.379		class 3	5.24176
TGME49_200270	PAN/Apple domain-containing protein	37.805	32.496	40.689	36.616	32.953	36.866		class 3	5.24051
TGME49_266750	transporter/permease protein, putative	37.723	37.257	38.37	37.21	37.748	37.929		class 3	5.23737
TGME49_309600	hypothetical protein	37.72	37.064	36.483	39.199	38.952	36.115		class 3	5.23726
TGME49_202390	S15 sporozoite-expressed protein	37.717	41.516	38.025	34.774	40.771	37.989		class 3	5.23714
TGME49_207950	hypothetical protein	37.707	35.756	35.41	36.292	37.035	36.638		class 3	5.23676
TGME49_226260	hypothetical protein	37.645	40.99	37.143	38.606	39.611	34.755		class 3	5.23439
TGME49_254880	Alpha-galactosidase	37.639	35.25	41.755	40.152	35.152	40.197		class 3	5.23416
TGME49_244380	cactin	37.631	36.513	36.382	37.379	37.752	35.519		class 3	5.23385
TGME49_205440	CCT chaperonin gamma subunit	37.616	37.895	36.232	38.797	37.747	39.293		class 3	5.23327
TGME49_228190	eukaryotic initiation factor-3, subunit 5, putative	37.573	39.941	38.871	39.834	42.351	38.179		class 3	5.23162
TGME49_257040	TB2/DP1, HVA22 family protein	37.543	37.34	38.444	36.558	37.017	39.749		class 3	5.23047
TGME49_459840	18S ribosomal RNA	37.534	36.866	51.026	28.185	58.205	100.035		class 3	5.23013
TGME49_215160	hypothetical protein	37.525	35.24	37.583	37.675	38.209	35.702		class 3	5.22978
TGME49_243930	hypothetical protein	37.477	38.204	32.276	33.948	39.633	31.551		class 3	5.22793
TGME49_293260	ATPase/histidine kinase/DNA gyrase B/HSP90 domain-containing protein	37.317	37.338	35.93	35.091	39.588	30.846		class 3	5.22176
TGME49_269450	hypothetical protein	37.31	32.118	33.434	30.438	35.394	32.143		class 3	5.22149
TGME49_268176	hypothetical protein	37.249	33.298	34.053	32.506	32.465	32.781		class 3	5.21913
TGME49_228360	peptidyl-prolyl isomerase FKBP12, putative	37.232	37.196	38.234	36.284	36.415	38.35		class 3	5.21847
TGME49_323310	hypothetical protein	37.216	62.622	32.149	36.062	59.552	29.658		class 3	5.21785
TGME49_458300	18S ribosomal RNA	37.172	35.954	54.893	30.408	59.161	99.764		class 3	5.21614
TGME49_238110	replication factor a protein 3 protein	37.145	38.594	43.176	42.538	40.751	42.698		class 3	5.2151
TGME49_240460	AP2 domain transcription factor AP2VI-1	37.093	35.494	37.26	38.636	34.448	40.751		class 3	5.21308
TGME49_277230	hypothetical protein	37.077	36.296	40.101	31.824	40.642	30.251		class 3	5.21245
TGME49_270800	GAF domain-containing protein	37.072	37.017	36.35	39.313	41.83	30.419		class 3	5.21226
TGME49_300060	signal peptidase subunit protein	37.038	38.948	38.285	36.954	39.753	37.048		class 3	5.21093
TGME49_271450	hypothetical protein	36.957	36.088	36.79	41.181	36.869	42.034		class 3	5.20778
TGME49_324800	tryptophanyl-tRNA synthetase	36.95	32.242	29.483	34.706	30.748	29.413		class 3	5.2075
TGME49_218880	SF-assemblin, putative	36.902	34.547	36.743	38.589	33.427	36.828		class 3	5.20563
TGME49_223680	ubiquitin family protein	36.873	36.981	37.964	36.366	36.505	35.331		class 3	5.20449
TGME49_216460	hypothetical protein	36.841	38.964	39.664	35.614	37.407	39.388		class 3	5.20324
TGME49_251760	subunit of proteaseome activator complex, putative	36.8	40.56	37.17	37.731	38.696	40.132		class 3	5.20163
TGME49_298620	hypothetical protein	36.679	36.119	40.019	35.368	37.534	36.858		class 3	5.19688
TGME49_259880	hypothetical protein	36.655	35.705	35.955	36.725	37.65	34.028		class 3	5.19594
TGME49_267430	DnaJ domain-containing protein	36.43	35.262	37.829	34.627	35.662	38.783		class 3	5.18706
TGME49_226830	DnaK family protein	36.427	32.918	34.708	36.911	34.935	36.091		class 3	5.18694
TGME49_254660	ankyrin repeat-containing protein	36.399	40.506	36.683	35.53	40.973	42.91		class 3	5.18583
TGME49_254070	hypothetical protein	36.369	36.337	38.882	36.488	36.106	38.839		class 3	5.18464
TGME49_234510	ankyrin repeat-containing protein	36.358	33.759	33.646	36.484	34.806	36.739		class 3	5.1842
TGME49_318650	transhydrogenase	36.33	36.283	34.914	34.876	37.034	33.641		class 3	5.18309
TGME49_313140	isocitrate dehydrogenase	36.292	36.046	35.459	36.052	36.45	32.208		class 3	5.18158
TGME49_211670	S1 RNA binding domain-containing protein	36.289	40.385	42.518	36.493	40.415	43.667		class 3	5.18146
TGME49_208370	myosin heavy chain, putative	36.289	35.583	31.729	33.884	34.327	29.616		class 3	5.18146
TGME49_312420	hypothetical protein	36.289	35.054	33.072	36.335	36.353	31.164		class 3	5.18146
TGME49_222952	phosphohistidine phosphatase	36.273	37.943	37.79	33.691	39.398	38.074		class 3	5.18082
TGME49_458160	18S ribosomal RNA	36.267	36.582	50.75	25.262	60.789	97.464		class 3	5.18059
TGME49_227640	hypothetical protein	36.257	32.658	37.375	34.094	37.017	37.436		class 3	5.18019
TGME49_269775	hypothetical protein	36.251	37.2	43.821	37.502	40.614	40.73		class 3	5.17995
TGME49_261400	hypothetical protein	36.224	37.471	34.736	35.22	38.232	34.054		class 3	5.17887
TGME49_243580	Hit family protein involved in cell-cycle regulation, putative	36.212	40.603	30.05	37.412	34.108	35.698		class 3	5.1784
TGME49_222860	eukaryotic translation initiation factor, putative	36.171	37.431	33.992	36.939	37.633	35.083		class 3	5.17676
TGME49_203540	RNA binding protein, putative	36.138	32.219	35.82	33.366	33.864	32.326		class 3	5.17544
TGME49_295960	hypothetical protein	36.004	35.787	35.49	30.499	36.307	31.915		class 3	5.17009
TGME49_243960	nuclear transport factor 2 (ntf2) domain-containing protein	35.963	35.245	33.511	33.801	37.11	33.214		class 3	5.16844
TGME49_284780	hypothetical protein	35.954	32.589	34.262	33.367	32.044	33.498		class 3	5.16808
TGME49_288500	FAD Malate-dehydrogenase (MDH-FAD)	35.833	33.241	34.898	36.272	34.067	32.859		class 3	5.16322
TGME49_212220	hypothetical protein	35.819	33.052	36.776	33.856	37.019	36.32		class 3	5.16265
TGME49_459600	18S ribosomal RNA	35.749	34.239	50.048	24.616	54.507	97.614		class 3	5.15983
TGME49_273060	ribosomal protein S17, putative	35.749	30.678	31.402	35.108	34.192	39.357		class 3	5.15983
TGME49_234180	hypothetical protein	35.712	33.106	27.76	35.553	32.803	26.948		class 3	5.15834
TGME49_218920	proteasome subunit beta type, putative	35.642	35.039	36.748	36.127	34.531	36.258		class 3	5.15551
TGME49_226072	Ser/Thr phosphatase family protein	35.614	34.705	34.051	34.188	33.988	33.199		class 3	5.15437
TGME49_253330	Rhoptry kinase family protein, truncated (incomplete catalytic triad)	35.604	31.355	35.019	36.355	27.658	34.426		class 3	5.15397
TGME49_289810	hypothetical protein	35.585	39.97	35.771	29.923	36.154	33.439		class 3	5.1532
TGME49_221180	hypothetical protein	35.58	35.047	32.733	33.969	36.839	32.367		class 3	5.15299
TGME49_218530	proteasome-interacting thioredoxin domain-containing protein	35.562	40.77	39.478	36.526	39.565	39.193		class 3	5.15226
TGME49_202680	peptidase M16, alpha subunit, putative	35.56	37.329	33.674	35.741	36.394	34.03		class 3	5.15218
TGME49_319550	membrane protein C17G8.08c, putative	35.524	35.63	36.336	35.945	35.448	37.264		class 3	5.15072
TGME49_294620	eukaryotic initiation factor-3, subunit 8, putative	35.488	36.971	35.241	37.39	38.581	35.459		class 3	5.14926
TGME49_238240	bystin protein	35.481	41.807	37.348	37.941	42.303	40.923		class 3	5.14897
TGME49_306490	hypothetical protein	35.449	34.062	34.023	32.382	36.955	30.488		class 3	5.14767
TGME49_286680	hypothetical protein	35.432	34.977	30.278	31.853	34.976	29.555		class 3	5.14698
TGME49_230350	hypothetical protein	35.42	36.095	35.326	35.686	37.385	35.552		class 3	5.14649
TGME49_241300	hypothetical protein	35.395	33.633	35.134	31.015	35.981	33.413		class 3	5.14547
TGME49_289770	mu1 adaptin	35.39	33.549	34.902	36.289	34.859	33.946		class 3	5.14527
TGME49_233400	TAF9 RNA polymerase II, TATA box binding protein (TBP)-associated factor isoform 2 family protein	35.38	43.782	38.45	38.967	46.727	39.273		class 3	5.14486
TGME49_299015	hypothetical protein	35.352	28.5	35.241	37.647	33.886	32.662		class 3	5.14372
TGME49_245480	hypothetical protein	35.333	43.4	36.623	37.066	40.797	35.402		class 3	5.14294
TGME49_246100	phosducin, putative	35.293	36.177	34.774	35.932	35.461	38.603		class 3	5.14131
TGME49_458450	18S ribosomal RNA	35.279	40.355	54.45	29.204	62.82	101.625		class 3	5.14074
TGME49_459260	18S ribosomal RNA	35.244	40.584	48.718	26.415	62.25	103.291		class 3	5.13931
TGME49_227150	glutaredoxin, putative	35.224	34.289	30.326	34.212	30.994	31.018		class 3	5.13849
TGME49_249590	proteasome subunit alpha type 5-2, putative	35.215	35.639	38.13	37.088	36.319	39.52		class 3	5.13812
TGME49_250690	zinc finger (CCCH type) motif-containing protein	35.194	31.564	33.459	33.517	35.337	31.705		class 3	5.13726
TGME49_256770	eukaryotic translation initiation factor 4A, isoform 3, putative	35.144	33.417	32.746	34.871	38.198	33.602		class 3	5.13521
TGME49_297180	hypothetical protein	35.108	30.997	31.595	32.736	33.614	31.239		class 3	5.13373
TGME49_232020	hypothetical protein	35.062	33.321	40.062	35.414	35.119	35.828		class 3	5.13184
TGME49_273310	hypothetical protein	35.027	38.921	33.881	35.914	34.921	35.405		class 3	5.1304
TGME49_239530	alanine-glyoxylate aminotransferase	35.023	31.541	40.912	35.492	32.758	40.786		class 3	5.13023
TGME49_225330	hypothetical protein	34.981	32.343	38.284	36.235	33.357	36.557		class 3	5.1285
TGME49_253650	DnaJ C terminal region domain-containing protein	34.955	30.867	35.972	32.5	32.387	34.371		class 3	5.12743
TGME49_292220	PCI domain-containing protein	34.931	33.09	34.14	34.878	33.731	34.152		class 3	5.12644
TGME49_460480	18S ribosomal RNA	34.879	37.302	49.813	28.479	59.857	97.333		class 3	5.12429
TGME49_225870	hypothetical protein	34.87	35.016	28.854	30.435	35.937	29.382		class 3	5.12391
TGME49_206350	ER-retrevial receptor Ter1p, putative	34.801	36.301	37.289	34.803	33.145	35.416		class 3	5.12106
TGME49_228630	hypothetical protein	34.756	32.88	35.865	35.397	35.474	36.543		class 3	5.11919
TGME49_219720	Ras-related protein Rab-5C, putative	34.706	31.622	31.894	32.162	34.547	33.924		class 3	5.11711
TGME49_250800	AP2 domain transcription factor AP2XII-8	34.693	31.058	30.309	32.041	34.661	30.321		class 3	5.11657
TGME49_249570	hypothetical protein	34.669	31.536	40.098	33.232	32.52	37.752		class 3	5.11557
TGME49_306000	AP2 domain transcription factor AP2IX-8	34.647	33.252	34.125	32.095	36.808	31.845		class 3	5.11466
TGME49_457400	18S ribosomal RNA	34.638	40.109	51.655	28.604	61.161	102.66		class 3	5.11428
TGME49_247470	nucleolar protein, putative	34.58	36.723	32.029	35.292	36.177	31.106		class 3	5.11187
TGME49_216130	ubiquitin conjugating enzyme E2, putative	34.575	36.082	33.496	33.921	35.103	33.877		class 3	5.11166
TGME49_259710	protein kinase	34.573	37.388	32.726	35.761	37.674	35.674		class 3	5.11157
TGME49_218940	hypothetical protein	34.567	34.489	35.5	37.346	37.084	33.834		class 3	5.11132
TGME49_458640	18S ribosomal RNA	34.543	38.525	47.309	26.808	60.068	96.089		class 3	5.11032
TGME49_257750	homocysteine s-methyltransferase domain-containing protein	34.501	34.955	33.794	30.962	30.249	29.981		class 3	5.10857
TGME49_249390	glutamate/leucine/phenylalanine/valine dehydrogenase family protein	34.451	32.25	33.129	33.251	32.567	30.904		class 3	5.10647
TGME49_205510	nucleolar protein 5, putative	34.45	31.991	30.147	36.582	35.605	31.069		class 3	5.10643
TGME49_219120	zinc finger (CCCH type) motif-containing protein	34.446	31.05	31.298	31.408	33.901	30.677		class 3	5.10626
TGME49_295310	tubulin binding cofactor A protein	34.428	36.664	39.192	32.303	31.284	38.634		class 3	5.10551
TGME49_272910	T-complex protein 1 delta subunit	34.425	34.03	34.562	34.492	34.912	33.015		class 3	5.10538
TGME49_222100	hypothetical protein	34.42	33.733	37.863	35.529	36.291	37.336		class 3	5.10518
TGME49_457330	18S ribosomal RNA	34.382	36.725	49.394	26.251	62.019	96.586		class 3	5.10358
TGME49_457430	18S ribosomal RNA	34.345	37.09	50.743	26.169	59.967	94.879		class 3	5.10203
TGME49_225300	hypothetical protein	34.331	32.885	33.767	34.106	30.516	32.271		class 3	5.10144
TGME49_266090	hypothetical protein	34.329	31.738	34.897	35.459	32.802	35.478		class 3	5.10136
TGME49_270060	hypothetical protein	34.327	40.169	37.965	32.814	42.422	32.737		class 3	5.10127
TGME49_320080	hypothetical protein	34.287	34.674	30.966	31.988	37.778	29.764		class 3	5.09959
TGME49_203700	SFT2 family protein	34.239	41.441	40.52	36.579	37.481	41.709		class 3	5.09757
TGME49_233110	IMP dehydrogenas	34.203	37.689	35.583	35.372	37.402	32.067		class 3	5.09605
TGME49_246720	hypothetical protein	34.131	34.408	32.826	32.369	32.308	31.181		class 3	5.09301
TGME49_276170	phosphatidylinositol 3- and 4-kinase	34.13	30.377	29.418	31.492	33.403	29.338		class 3	5.09297
TGME49_305460	methionine aminopeptidase 2, putative	34.125	28.144	33.358	35.852	28.105	32.31		class 3	5.09276
TGME49_304955	serine/threonine specific protein phosphatase	34.123	34.316	33.971	34.135	32.769	32.227		class 3	5.09267
TGME49_241160	hemolysin-III related subfamily protein	34.117	32.074	31.477	32.599	29.365	31.411		class 3	5.09242
TGME49_209150	non-proton pumping type-II NADH dehydrogenase I	34.115	35.324	36.38	33.103	34.421	35.321		class 3	5.09233
TGME49_234540	hypothetical protein	34.048	33.574	36.501	34.314	30.942	36.31		class 3	5.0895
TGME49_458650	18S ribosomal RNA	33.99	41.525	52.97	30.014	63.541	99.565		class 3	5.08704
TGME49_202890	hypothetical protein	33.981	32.262	34.962	34.181	35.203	32.307		class 3	5.08666
TGME49_460970	18S ribosomal RNA	33.978	34.895	50.901	27.184	59.594	92.418		class 3	5.08653
TGME49_268610	hypothetical protein	33.967	33.182	39.754	36.144	31.578	37.804		class 3	5.08606
TGME49_457940	18S ribosomal RNA	33.966	36.391	44.756	26.461	55.158	89.168		class 3	5.08602
TGME49_254820	hypothetical protein	33.93	33.629	32.246	37.141	37.74	31.614		class 3	5.08449
TGME49_236060	hypothetical protein	33.905	37.324	38.891	36.068	34.357	38.061		class 3	5.08343
TGME49_461140	18S ribosomal RNA	33.886	36.155	49.405	26.114	55.047	97.284		class 3	5.08262
TGME49_281960	hypothetical protein	33.793	34.593	33.904	33.182	37.264	33.087		class 3	5.07865
TGME49_291330	RNA recognition motif-containing protein	33.717	31.732	33.103	34.462	32.801	31.695		class 3	5.0754
TGME49_294970	hypothetical protein	33.713	31.698	34.793	32.433	31.03	33.745		class 3	5.07523
TGME49_265530	RNA recognition motif-containing protein	33.7	33.619	30.81	33.424	34.334	29.091		class 3	5.07468
TGME49_203720	vitamin k epoxide reductase family protein	33.679	44.093	41.479	32.688	42.141	43.806		class 3	5.07378
TGME49_311290	protein tyrosine phosphatase family protein, ptpla protein	33.646	33.458	35.618	33.735	32.716	36.938		class 3	5.07236
TGME49_222870	hypothetical protein	33.612	32.783	32.02	32.832	32.515	33.916		class 3	5.0709
TGME49_262950	hypothetical protein	33.6	31.088	34.806	29.856	31.776	33.708		class 3	5.07039
TGME49_263570	hypothetical protein	33.559	33.833	38.318	36.261	31.282	39.249		class 3	5.06863
TGME49_215430	hypothetical protein	33.541	32.691	30.164	30.054	33.941	29.457		class 3	5.06785
TGME49_243710	t-complex protein beta subunit	33.473	31.419	33.38	32.05	31.047	32.042		class 3	5.06493
TGME49_458760	18S ribosomal RNA	33.432	34.016	50.353	28.7	56.442	96.163		class 3	5.06316
TGME49_239600	rhoptry kinase family protein ROP23 (incomplete catalytic triad)	33.41	27.522	32.89	32.962	28.09	33.302		class 3	5.06221
TGME49_459660	18S ribosomal RNA	33.396	33.409	48.367	24.143	54.941	91.801		class 3	5.0616
TGME49_262400	lipase	33.391	28.618	30.943	31.402	30.093	29.935		class 3	5.06139
TGME49_244080	hypothetical protein	33.376	33.887	34.621	34.969	32.746	34.086		class 3	5.06074
TGME49_229950	26S proteasome regulatory subunit 6b, putative	33.369	33.948	33.466	32.087	33.717	35.327		class 3	5.06044
TGME49_258150	proteasome subunit alpha type 7, putative	33.366	31.231	35.817	38.767	34.349	33.802		class 3	5.06031
TGME49_228110	hypothetical protein	33.364	32.706	26.715	31.849	32.437	26.672		class 3	5.06022
TGME49_460490	18S ribosomal RNA	33.325	32.752	43.617	23.494	55.431	89.065		class 3	5.05853
TGME49_250820	hypothetical protein	33.318	31.451	31.942	30.916	33.014	29.748		class 3	5.05823
TGME49_280490	U-box domain-containing protein	33.307	33.023	33.751	32.389	34.038	32.301		class 3	5.05775
TGME49_239830	TBC domain-containing protein	33.3	30.474	32.718	31.4	33.449	30.266		class 3	5.05745
TGME49_255195	hypothetical protein	33.182	34.351	35.004	34.2	34.026	38.802		class 3	5.05233
TGME49_458480	18S ribosomal RNA	33.177	36.639	49.85	30.907	58.322	97.085		class 3	5.05211
TGME49_226960	phosphofructokinase PFKII	33.174	31.8	34.264	36.243	34.16	34.079		class 3	5.05198
TGME49_269885	rhoptry metalloprotease toxolysin TLN1	33.111	30.808	34.985	33.115	33.631	33.546		class 3	5.04924
TGME49_248520	hypothetical protein	33.104	33.87	35.314	36.579	35.807	36.464		class 3	5.04893
TGME49_299980	hypothetical protein	33.091	38.004	33.617	37.097	34.205	30.578		class 3	5.04837
TGME49_460340	18S ribosomal RNA	33.075	38.537	48.105	27.593	63.816	96.797		class 3	5.04767
TGME49_300260	threonyl-tRNA synthetase family protein	33.025	35.089	34.976	34.828	35.037	34.218		class 3	5.04549
TGME49_459860	18S ribosomal RNA	32.986	33.385	46.718	22.82	52.605	90.168		class 3	5.04378
TGME49_460780	18S ribosomal RNA	32.981	36.734	48.725	26.449	55.32	95.146		class 3	5.04356
TGME49_202780	rhoptry kinase family protein ROP25	32.964	34.393	31.085	32.876	36.895	32.972		class 3	5.04282
TGME49_280600	histidyl-tRNA synthetase (HisRS), putative	32.929	31.658	29.222	33.956	34.337	29.89		class 3	5.04129
TGME49_310170	hypothetical protein	32.927	34.048	28.899	31.11	36.952	27.394		class 3	5.0412
TGME49_273030	phosphoglycerate mutase family protein	32.925	31.776	36.877	35.069	31.113	37.85		class 3	5.04111
TGME49_216220	AP2 domain transcription factor AP2XI-5	32.911	31.723	30.879	31.21	35.686	32.261		class 3	5.0405
TGME49_306650	hypothetical protein	32.901	31.255	30.398	32.061	31.838	32.727		class 3	5.04006
TGME49_459080	18S ribosomal RNA	32.885	40.603	47.854	26.293	58.081	92.645		class 3	5.03936
TGME49_206320	hypothetical protein	32.883	32.185	34.811	31.046	35.641	34.065		class 3	5.03927
TGME49_459300	18S ribosomal RNA	32.87	36.661	44.732	28.47	58.273	94.524		class 3	5.0387
TGME49_221400	hypothetical protein	32.866	30.071	31.111	30.38	32.509	27.867		class 3	5.03852
TGME49_278850	DHHC zinc finger domain-containing protein	32.865	31.704	32.543	31.549	32.236	30.336		class 3	5.03848
TGME49_320490	N-acyl-phosphatidylethanolamine-hydrolyzing phospholipase D family protein	32.843	28.578	25.626	31.59	32.217	26.517		class 3	5.03751
TGME49_216930	cholinephosphate cytidylyltransferase	32.833	31.851	38.186	31.315	32.125	36.635		class 3	5.03707
TGME49_236210	peptidase M16 family potein, putative	32.806	32.771	29.815	32.747	34.332	28.995		class 3	5.03589
TGME49_318750	deoxyribose-phosphate aldolase	32.8	24.964	37.087	33.892	24.689	34.447		class 3	5.03562
TGME49_293400	hypothetical protein	32.796	31.807	34.808	37.008	31.542	29.839		class 3	5.03545
TGME49_216670	FUSE-binding protein 2 / KH-type splicing regulatory protein	32.771	31.232	31.798	31.879	33.01	30.76		class 3	5.03435
TGME49_314830	pre-mRNA splicing factor subunit, putative	32.762	31.09	28.664	33.711	30.76	28.921		class 3	5.03395
TGME49_249440	hypothetical protein	32.742	31.04	35.201	33.026	33.314	31.381		class 3	5.03307
TGME49_222920	mbp-1 interacting protein-2a family protein	32.71	41.124	36.292	40.471	38.203	33.61		class 3	5.03166
TGME49_249740	translation machinery associated tma7 protein	32.692	35.551	32.92	35.464	31.23	33.527		class 3	5.03087
TGME49_240520	hypothetical protein	32.67	30.045	32.954	33.248	32.722	35.472		class 3	5.02989
TGME49_305070	hypothetical protein	32.655	26.834	33.172	34.977	27.435	31.476		class 3	5.02923
TGME49_295030	hypothetical protein	32.642	30.198	27.54	31.705	32.599	29.54		class 3	5.02866
TGME49_272460	hypothetical protein	32.608	33.508	31.778	33.212	30.344	32.47		class 3	5.02715
TGME49_312570	CMGC kinase, MAPK family (ERK) MAPK-1	32.6	29.957	35.434	31.337	32.167	34.013		class 3	5.0268
TGME49_457620	18S ribosomal RNA	32.549	33.981	47.886	27.184	57.094	91.068		class 3	5.02454
TGME49_206470	pyruvate dehydrogenase complex subunit PDH-E3II	32.513	35.116	33.435	34.591	35.851	33.774		class 3	5.02294
TGME49_314800	hypothetical protein	32.512	31.91	31.955	32.849	34.115	32.811		class 3	5.0229
TGME49_461470	18S ribosomal RNA	32.509	35.041	48.405	23.315	54.299	93.74		class 3	5.02277
TGME49_264740	hypothetical protein	32.504	32.847	33.172	31.625	30.741	32.099		class 3	5.02255
TGME49_459020	18S ribosomal RNA	32.473	36.144	49.587	24.574	56.752	93.541		class 3	5.02117
TGME49_207770	PCI domain-containing protein	32.445	34.028	31.592	32.582	34.188	33.065		class 3	5.01992
TGME49_461010	18S ribosomal RNA	32.439	31.648	43.998	24.709	54.593	89.361		class 3	5.01966
TGME49_460550	18S ribosomal RNA	32.278	37.067	47.682	25.672	54.768	93.805		class 3	5.01248
TGME49_459280	18S ribosomal RNA	32.265	36.74	44.959	24.965	58.871	91.467		class 3	5.0119
TGME49_226650	hypothetical protein	32.218	36.917	29.534	33.843	32.716	36.051		class 3	5.0098
TGME49_209070	hypothetical protein	32.21	33.846	32.112	32.816	34.226	33.057		class 3	5.00944
TGME49_322030	hypothetical protein	32.19	58.07	28.68	34.921	54.523	27.396		class 3	5.00854
TGME49_295340	UV excision repair protein Rad23 protein	32.188	36.607	33.675	31.648	33.145	32.66		class 3	5.00845
TGME49_457380	18S ribosomal RNA	32.146	31.74	45.307	24.344	55.228	91.902		class 3	5.00657
TGME49_272520	hypothetical protein	32.144	29.762	26.425	35.778	32.595	27.962		class 3	5.00648
TGME49_251620	flap structure-specific endonuclease 1, putative	32.14	32.368	32.495	33.196	31.091	32.974		class 3	5.0063
TGME49_201680	eukaryotic initiation factor-3 subunit 10, putative	32.129	30.453	30.09	33.843	33.346	29.308		class 3	5.0058
TGME49_267050	hydrolase, alpha/beta fold family protein	32.118	29.416	35.149	31.668	29.661	36.933		class 3	5.00531
TGME49_261750	rhoptry neck protein RON10	32.077	31.53	36.184	31.235	33.352	34.842		class 3	5.00347
TGME49_293780	hypothetical protein	32.053	28.711	32.507	33.803	27.901	30.667		class 3	5.00239
TGME49_270520	hypothetical protein	32.023	36.452	30.447	33.431	35.097	31.483		class 3	5.00104
TGME49_286920	SWIRM domain-containing protein	31.985	30.73	33.259	30.906	32.785	30.787		class 3	4.99932
TGME49_258790	zinc finger, C3HC4 type (RING finger) domain-containing protein	31.949	30.85	36.535	31.543	31.647	38.241		class 3	4.9977
TGME49_203810	kelch repeat-containing protein	31.947	32.579	33.697	34.428	31.087	33.182		class 3	4.99761
TGME49_264640	bromodomain-containing protein	31.936	34.738	30.018	31.865	38.897	31.251		class 3	4.99711
TGME49_226420	peptidase family M3 protein	31.893	29.752	28.381	30.365	31.123	28.808		class 3	4.99517
TGME49_222130	hypothetical protein	31.889	31.06	27.795	29.938	29.679	27.088		class 3	4.99499
TGME49_457750	18S ribosomal RNA	31.859	34.137	44.223	27.054	56.079	86.657		class 3	4.99363
TGME49_215060	small GTP-binding protein sar1, putative	31.853	35.94	37.926	34.881	34.134	37.242		class 3	4.99336
TGME49_217820	PCI domain-containing protein	31.853	31.697	29.929	31.788	33.093	30.01		class 3	4.99336
TGME49_254580	UDP-galactose transporter family protein	31.836	31.042	35.182	34.112	35.953	34.994		class 3	4.99259
TGME49_289630	microneme protein MIC16	31.803	27.906	27.463	29.514	30.476	26.743		class 3	4.99109
TGME49_297845	hypothetical protein	31.78	30.237	33.957	32.023	28.337	34.181		class 3	4.99005
TGME49_297870	hypothetical protein	31.778	30.597	33.361	29.972	29.122	32.826		class 3	4.98996
TGME49_246580	hypothetical protein	31.772	32.631	30.144	30.802	32.107	29.098		class 3	4.98968
TGME49_224170	SAG-related sequence SRS60A	31.725	31.428	39.637	31.847	33.161	38.181		class 3	4.98755
TGME49_458410	18S ribosomal RNA	31.723	32.659	45.32	23.725	54.116	86.331		class 3	4.98746
TGME49_280740	signal peptidase	31.711	34.92	32.039	31.598	31.573	35.924		class 3	4.98691
TGME49_287170	hypothetical protein	31.71	33.081	34.674	33.199	34.358	31.467		class 3	4.98687
TGME49_264030	aminotransferase, putative	31.702	31.136	30.349	30.85	31.306	27.667		class 3	4.9865
TGME49_208300	hypothetical protein	31.638	31.581	31.951	35.175	30.251	33.783		class 3	4.98359
TGME49_261580	histone H2AX	31.577	30.037	27.917	27.685	25.304	27.596		class 3	4.9808
TGME49_263260	transporter, major facilitator family protein	31.558	32.016	30.64	32.068	36.534	31.21		class 3	4.97993
TGME49_320515	hypothetical protein	31.548	29.549	30.577	30.833	30.042	30.492		class 3	4.97948
TGME49_460370	18S ribosomal RNA	31.541	35.984	48.285	25.654	56.237	96.441		class 3	4.97916
TGME49_226740	zinc finger, C3HC4 type (RING finger) domain-containing protein	31.536	31.912	29.991	29.811	32.558	29.964		class 3	4.97893
TGME49_270200	hypothetical protein	31.533	31.75	30.715	30.983	32.247	31.815		class 3	4.97879
TGME49_215420	SNARE protein	31.502	32.713	33.186	33.044	33.921	34.92		class 3	4.97737
TGME49_286120	prolyl endopeptidase	31.414	33.3	32.247	31.322	33.361	32.036		class 3	4.97334
TGME49_302050	elongation factor tu, apicoplast, putative	31.36	27.45	13.68	33.835	16.475	13.403		class 3	4.97085
TGME49_225098	hypothetical protein	31.357	38.606	38.946	32.918	35.784	38.52		class 3	4.97072
TGME49_223125	ubiquitin family protein	31.355	30.27	30.697	31.519	29.086	29.621		class 3	4.97062
TGME49_460470	18S ribosomal RNA	31.344	34.706	42.239	25.964	50.507	88.522		class 3	4.97012
TGME49_248420	hypothetical protein	31.33	31.767	30.484	31.358	32.675	28.568		class 3	4.96947
TGME49_208790	MC family transporter, putative	31.268	29.139	31.166	33.19	31.751	32.33		class 3	4.96662
TGME49_295935	KRUF family protein	31.249	32.991	30.63	30.192	31.737	28.364		class 3	4.96574
TGME49_277500	26S proteasome regulatory subunit 7, putative	31.242	33.414	34.554	32.572	33.683	31.938		class 3	4.96541
TGME49_263550	39S ribosomal protein L47, mitochondrial precursor, putative	31.239	31.575	29.934	30.638	30.2	33.24		class 3	4.96528
TGME49_320030	hypothetical protein	31.223	31.965	32.541	32.685	32.104	29.376		class 3	4.96454
TGME49_232780	hypothetical protein	31.221	29.562	33.383	31.055	28.28	33.65		class 3	4.96444
TGME49_247360	PAP2 superfamily protein	31.166	31.168	29.214	30.453	29.835	30.788		class 3	4.9619
TGME49_203880	hypothetical protein	31.159	28.002	29.434	29.99	29.207	29.541		class 3	4.96158
TGME49_278870	myosin F	31.142	32.191	30.773	29.888	31.325	30.204		class 3	4.96079
TGME49_201800	hypothetical protein	31.083	34.365	34.729	36.292	34.009	35.134		class 3	4.95805
TGME49_253700	transporter, major facilitator family protein	31.068	27.689	29.73	28.991	29.16	28.476		class 3	4.95736
TGME49_310960	vacuolar atp synthase subunit f, putative	31.064	32.68	31.233	34.403	30.692	35.042		class 3	4.95717
TGME49_458280	18S ribosomal RNA	31.029	33.787	44.826	23.838	57.795	87.983		class 3	4.95555
TGME49_224350	aminopeptidase N, putative	31.002	30.582	30.756	30.395	33.444	28.966		class 3	4.95429
TGME49_314090	proteasome beta subunit	30.979	32.203	33.308	32.008	30.464	31.042		class 3	4.95322
TGME49_214090	signal peptidase	30.976	29.934	31.219	29.13	30.534	28.879		class 3	4.95308
TGME49_217680	hypothetical protein	30.95	28.755	27.51	29.291	31.54	26.966		class 3	4.95187
TGME49_458010	28S ribosomal RNA	30.934	42.86	57.24	26.142	54.715	97.16		class 3	4.95112
TGME49_281955	hypothetical protein	30.897	30.586	32.977	29.331	28.233	30.093		class 3	4.94939
TGME49_294560	rhoptry kinase family protein ROP37 (incomplete catalytic triad)	30.896	27.335	30.519	28.785	29.166	31.785		class 3	4.94935
TGME49_288540	nucleoside transporter protein	30.896	29.005	31.374	30.26	28.399	30.437		class 3	4.94935
TGME49_217560	DNA-directed RNA polymerase II RPB10	30.853	36.694	32.746	33.066	33.214	33.327		class 3	4.94734
TGME49_212190	RNA recognition motif-containing protein	30.852	26.837	28.347	27.522	31.01	29.171		class 3	4.94729
TGME49_247610	small nuclear ribonucleoprotein E, putative	30.738	36.722	31.892	37.215	36.776	36.142		class 3	4.94195
TGME49_268830	hypothetical protein	30.709	30.174	30.203	32.664	32.619	31.255		class 3	4.94059
TGME49_460630	18S ribosomal RNA	30.697	32.575	43.226	25.204	54.553	86.634		class 3	4.94003
TGME49_250100	hypothetical protein	30.695	30.791	33.452	28.171	26.649	30.176		class 3	4.93993
TGME49_458190	18S ribosomal RNA	30.691	33.374	42.34	24.901	50.449	87.83		class 3	4.93974
TGME49_222350	hypothetical protein	30.669	31.396	30.525	30.923	29.78	30.062		class 3	4.93871
TGME49_286730	SRP19 protein	30.661	33.37	30.222	32.437	31.788	31.128		class 3	4.93833
TGME49_263590	hypothetical protein	30.612	31.985	34.135	31.203	29.64	32.725		class 3	4.93603
TGME49_278830	glucose-6-phosphate 1-dehydrogenase	30.611	29.219	30.509	30.202	30.873	29.12		class 3	4.93598
TGME49_318570	SFT2 family protein	30.539	28.967	29.93	28.036	30.326	27.661		class 3	4.93258
TGME49_322110	hypothetical protein	30.52	53.263	26.285	28.227	52.852	26.466		class 3	4.93168
TGME49_207065	hypothetical protein	30.489	27.217	29.7	28.535	27.506	30.685		class 3	4.93022
TGME49_224340	hypothetical protein	30.485	33.439	30.792	31.604	31.665	33.323		class 3	4.93003
TGME49_202370	T-complex protein 1, epsilon subunit (TCP-1-epsilon), putative	30.475	27.795	29.138	29.537	28.012	29.231		class 3	4.92955
TGME49_459460	18S ribosomal RNA	30.436	35.334	49.255	27.475	57.61	89.771		class 3	4.92771
TGME49_305090	kinase binding protein cgi-121 protein	30.413	30.338	31.027	28.419	30.053	30.205		class 3	4.92662
TGME49_227948	peptidase M16 inactive domain-containing protein	30.357	30.288	27.632	29.575	34.511	28.631		class 3	4.92396
TGME49_270370	clathrin assembly protein AP19, putative	30.344	28.781	31.323	33.401	33.352	32.925		class 3	4.92334
TGME49_279340	hypothetical protein	30.305	36.741	34.853	35.244	31.559	33.504		class 3	4.92148
TGME49_206450	autophagy-related cysteine peptidase atg4, putative	30.301	27.168	28.475	27.814	31.395	26.845		class 3	4.92129
TGME49_216060	hypothetical protein	30.235	28.278	25.398	26.559	26.962	24.97		class 3	4.91815
TGME49_262100	tetratricopeptide repeat-containing protein	30.225	32.385	33.57	33.07	31.374	33.443		class 3	4.91767
TGME49_258780	OTU family cysteine protease	30.206	31.002	30.681	30.053	32.69	30.268		class 3	4.91676
TGME49_245475	hypothetical protein	30.203	33.383	30.338	36.75	34.716	30.926		class 3	4.91662
TGME49_212900	hypothetical protein	30.19	27.006	26.62	29.011	27.847	27.438		class 3	4.916
TGME49_262930	hypothetical protein	30.188	33.164	33.19	32.021	30.005	37.523		class 3	4.9159
TGME49_311510	eIF2 kinase IF2K-B	30.181	28.926	28.675	28.428	33.127	26.224		class 3	4.91557
TGME49_241180	hypothetical protein	30.155	28.914	30.626	30.163	28.689	32.461		class 3	4.91433
TGME49_253440	cell-cycle-associated protein kinase SRPK, putative	30.142	28.024	26.99	28.597	30.681	27.958		class 3	4.9137
TGME49_304770	ubiquitin-conjugating enzyme subfamily protein	30.131	29.249	32.429	32.612	32.646	34.484		class 3	4.91318
TGME49_229680	hypothetical protein	30.131	26.697	28.552	30.821	29.421	28.379		class 3	4.91318
TGME49_214970	DNA replication licensing factor, putative	30.123	29.006	30.553	30.484	30.288	28.111		class 3	4.91279
TGME49_289740	hypothetical protein	30.11	28.57	33.524	31.588	29.059	33.811		class 3	4.91217
TGME49_276210	phosphoglycerate mutase family protein	30.106	31.018	37.368	33.215	30.096	35.921		class 3	4.91198
TGME49_327200	rhoptry neck protein, putative	30.102	28.491	31.926	26.616	32.927	26.895		class 3	4.91179
TGME49_268170	hypothetical protein	30.095	32.434	32.336	33.394	32.279	31.881		class 3	4.91145
TGME49_457390	28S ribosomal RNA	30.093	44.496	55.42	26.548	53.499	106.726		class 3	4.91136
TGME49_222240	hypothetical protein	30.083	30.463	29.168	28.335	32.085	26.285		class 3	4.91088
TGME49_458360	18S ribosomal RNA	30.031	30.355	43.476	23.937	50.052	84.766		class 3	4.90838
TGME49_228280	hypothetical protein	30.027	29.193	27.535	30.605	31.181	25.731		class 3	4.90819
TGME49_218280	eukaryotic porin, putative	30.023	31.5	30.113	31.87	31.477	29.667		class 3	4.908
TGME49_202820	ubiquitin-conjugating enzyme subfamily protein	29.995	30.214	27.754	31.609	32.402	28.064		class 3	4.90665
TGME49_235450	ubiquitin-conjugating enzyme subfamily protein	29.981	33.256	30.138	29.051	32.731	29.538		class 3	4.90598
TGME49_312630	anonymous antigen-1, putative	29.979	28.368	26.52	28.339	31.352	27.025		class 3	4.90588
TGME49_458050	18S ribosomal RNA	29.924	34.885	45.731	23.236	52.199	91.229		class 3	4.90323
TGME49_221905	hypothetical protein	29.922	29.698	30.203	29.72	33.217	29.213		class 3	4.90313
TGME49_221480	hypothetical protein	29.922	28.797	29.83	29.93	29.761	28.476		class 3	4.90313
TGME49_258720	Ubiquitin family protein, putative	29.905	37.658	36.164	33.817	32.935	38.886		class 3	4.90231
TGME49_457970	18S ribosomal RNA	29.901	31.649	42.547	23.553	51.477	90.665		class 3	4.90212
TGME49_263560	hypothetical protein	29.833	29.778	30.296	30.934	27.814	29.424		class 3	4.89884
TGME49_241610	hypothetical protein	29.815	24.978	31.738	28.291	26.521	29.21		class 3	4.89797
TGME49_232260	hypothetical protein	29.812	32.042	32.801	32.583	36.109	31.321		class 3	4.89782
TGME49_297500	T-complex protein 1 eta subunit	29.805	29.683	32.428	30.169	30.306	30.023		class 3	4.89748
TGME49_306370	hypothetical protein	29.751	33.266	28.858	27.46	28.981	26.765		class 3	4.89487
TGME49_321420	kelch repeat-containing protein	29.681	28.506	26.782	29.428	29.892	25.461		class 3	4.89147
TGME49_230340	hypothetical protein	29.651	29.759	27.747	27.987	31.178	26.871		class 3	4.89001
TGME49_256990	glycyl-tRNA synthetase	29.641	29.58	27.345	30.506	29.11	28.148		class 3	4.88952
TGME49_229990	T-complex protein 1 subunit alpha, putative	29.636	31.521	28.547	29.459	30.784	30.349		class 3	4.88928
TGME49_256060	nucleosome assembly protein (nap) protein	29.611	28.165	28.995	25.394	27.952	29.367		class 3	4.88806
TGME49_257550	hypothetical protein	29.571	28.624	32.739	29.197	30.092	33.922		class 3	4.88611
TGME49_265310	heat shock protein 40, putative	29.544	26.92	27.778	27.732	28.311	27.987		class 3	4.88479
TGME49_219850	prolyl-tRNA synthetase (ProRS)	29.542	29.463	28.836	30.017	30.011	28.103		class 3	4.8847
TGME49_236050	fructose-bisphosphate aldolase, putative	29.537	31.391	28.795	26.271	29.63	27.432		class 3	4.88445
TGME49_266050	hypothetical protein	29.512	32.083	23.634	28.433	28.287	23.073		class 3	4.88323
TGME49_293770	chitinase-like protein CLP1	29.501	26.994	23.985	28.016	29.879	24.688		class 3	4.88269
TGME49_266120	thioredoxin-dependent peroxidase TPX1/2	29.481	31.305	32.813	28.953	29.568	30.078		class 3	4.88171
TGME49_460620	18S ribosomal RNA	29.475	32.735	42.286	21.938	47.469	77.744		class 3	4.88142
TGME49_263230	hypothetical protein	29.458	32.325	27.783	33.082	34.212	27.697		class 3	4.88059
TGME49_304900	hypothetical protein	29.421	27.244	30.458	28.206	28.596	30.855		class 3	4.87877
TGME49_233500	triose-phosphate isomerase TPI-II	29.412	29.848	34.561	29.107	28.136	32.324		class 3	4.87833
TGME49_233530	hypothetical protein	29.407	28.758	30.296	30.256	29.868	29.741		class 3	4.87809
TGME49_222245	hypothetical protein	29.395	31.377	27.854	27.519	30.439	26.578		class 3	4.8775
TGME49_255910	PfMNL-2 CISD1 family iron-sulfur protein, putative	29.375	28.617	30.523	28.093	27.943	30.389		class 3	4.87652
TGME49_461370	28S ribosomal RNA	29.374	46.402	56.49	28.438	55.876	108.185		class 3	4.87647
TGME49_291900	Ydr279p family (RNase H2 complex component) protein	29.361	26.845	31.43	28.427	25.651	29.676		class 3	4.87583
TGME49_320110	proliferating cell nuclear antigen PCNA2	29.34	27.668	33.983	29.872	29.179	31.811		class 3	4.8748
TGME49_276120	histone lysine methyltransferase, SET, putative	29.333	33.329	32.575	32.354	28.981	31.464		class 3	4.87445
TGME49_458920	18S ribosomal RNA	29.313	29.334	41.727	21.5	47.326	80.491		class 3	4.87347
TGME49_310670	glycogen phosphorylase 1, putative	29.313	29.62	33.649	29.296	28.025	30.925		class 3	4.87347
TGME49_226580	hypothetical protein	29.312	29.4	29.145	27.473	31.238	27.578		class 3	4.87342
TGME49_320570	elongation factor Tu, putative	29.294	29.875	29.563	31.511	30.922	30.141		class 3	4.87253
TGME49_287500	T complex chaperonin, putative	29.291	27.553	28.952	28.06	29.175	27.643		class 3	4.87239
TGME49_280570	SAG-related sequence SRS35A	29.289	14.016	17.427	27.907	10.885	14.869		class 3	4.87229
TGME49_225860	hypothetical protein	29.282	27.203	29.162	28.339	28.775	28.609		class 3	4.87194
TGME49_295950	KRUF family protein	29.251	28.995	29.056	23.406	29.114	24.257		class 3	4.87041
TGME49_252295	hypothetical protein	29.244	29.541	27.113	28.698	26.677	25.816		class 3	4.87007
TGME49_227920	hypothetical protein	29.235	30.468	30.259	30.446	30.107	33.245		class 3	4.86962
TGME49_211460	hypothetical protein	29.225	28.351	30.375	30.885	29.275	27.301		class 3	4.86913
TGME49_229450	hypothetical protein	29.221	34.062	30.241	32.079	29.504	29.538		class 3	4.86893
TGME49_312100	plasma membrane-type Ca(2+)-ATPase A1 PMCAA1	29.202	30.488	27.752	26.809	31.191	26.115		class 3	4.868
TGME49_208722	hypothetical protein	29.202	26.337	22.777	26.089	30.454	27.49		class 3	4.868
TGME49_258230	rhoptry kinase family protein ROP20	29.178	29.642	28.203	25.387	29.771	24.021		class 3	4.86681
TGME49_255510	ankyrin repeat-containing protein	29.151	28.56	32.785	28.981	32.316	30.542		class 3	4.86547
TGME49_310230	hypothetical protein	29.143	27.781	29.043	29.4	25.74	27.589		class 3	4.86508
TGME49_232690	DP-fucose transporter, putative	29.127	30.675	32.441	29.841	29.653	32.263		class 3	4.86429
TGME49_457920	18S ribosomal RNA	29.116	30.626	40.908	22.054	50.135	84.091		class 3	4.86374
TGME49_226068	DnaJ domain-containing protein	29.115	30.83	30.082	29.27	29.084	29.375		class 3	4.86369
TGME49_305850	RNA recognition motif-containing protein	29.109	28.099	28.189	28.195	29.466	26.732		class 3	4.86339
TGME49_300220	hypothetical protein	29.1	26.32	29.941	29.193	25.718	28.658		class 3	4.86295
TGME49_299030	RNA recognition motif 2 protein	29.065	27.913	31.25	29.211	29.103	31.675		class 3	4.86121
TGME49_313880	nuclear protein-like family protein	29.054	28.452	33.156	30.367	27.676	32.749		class 3	4.86066
TGME49_266970	hypothetical protein	29.038	32.719	29.195	29.167	33.821	27.421		class 3	4.85987
TGME49_246182	hypothetical protein	29.023	22.112	28.613	28.935	28.713	30.937		class 3	4.85912
TGME49_214210	rRNA pseudouridine synthase	29.021	30.672	26.719	28.532	30.373	25.049		class 3	4.85903
TGME49_288840	hypothetical protein	29.001	2.874	1034.25	26.374	2.328	1016.65		class 3	4.85803
TGME49_457720	18S ribosomal RNA	28.994	30.014	41.106	22.15	47.982	82.586		class 3	4.85768
TGME49_460250	18S ribosomal RNA	28.966	30.417	40.796	24.395	50.094	81.497		class 3	4.85629
TGME49_227570	transmembrane amino acid transporter protein	28.943	30.183	32.039	29.867	29.493	29.035		class 3	4.85514
TGME49_311310	protein phosphatase 2B catalytic subunit, calcineurin family phosphatse superfamily protein	28.888	28.59	26.56	27.629	30.149	25.673		class 3	4.8524
TGME49_307605	hypothetical protein	28.785	30.34	30.952	32.617	30.023	30.895		class 3	4.84725
TGME49_293570	translocation protein sec62, putative	28.777	30.167	30.717	28.586	31.364	30.271		class 3	4.84684
TGME49_319530	splicing factor SF2	28.722	27.517	26.594	26.877	26.634	25.376		class 3	4.84408
TGME49_292950	hypothetical protein	28.699	30.564	25.406	26.366	30.725	22.01		class 3	4.84293
TGME49_286490	G protein-coupled receptor 89 isoform 5, putative	28.697	35.199	31.605	29.46	35.786	32.207		class 3	4.84283
TGME49_318410	TCP-1 chaperonin, putative	28.685	27.45	28.54	29.304	30.35	28.65		class 3	4.84222
TGME49_244650	eukaryotic initiation factor-5, putative	28.658	28.493	28.749	28.538	29.687	27.003		class 3	4.84087
TGME49_273070	GTPase activating protein for adp ribosylation factor, putative	28.644	28.27	30.145	27.927	28.332	30.609		class 3	4.84016
TGME49_293710	Zn-finger in Ran binding protein and others domain-containing protein	28.617	28.898	30.655	26.968	32.203	29.513		class 3	4.8388
TGME49_267340	hypothetical protein	28.602	28.686	29.57	26.727	28.858	28.512		class 3	4.83804
TGME49_226680	hypothetical protein	28.592	28.252	31.393	29.124	28.435	29.31		class 3	4.83754
TGME49_246950	hypothetical protein	28.574	26.029	28.639	26.135	24.467	28.805		class 3	4.83663
TGME49_286710	zinc finger, c2h2 type domain-containing protein	28.536	28.001	28.39	30.168	27.833	27.081		class 3	4.83471
TGME49_459090	18S ribosomal RNA	28.535	31.115	43.355	22.869	50.826	84.449		class 3	4.83466
TGME49_458320	18S ribosomal RNA	28.533	32.261	41.245	23.911	50.854	81.269		class 3	4.83456
TGME49_320140	ubiquinol-cytochrome c reductase hinge protein, putative	28.493	29.902	31.58	30.073	33.661	31.276		class 3	4.83254
TGME49_297650	Ser/Thr phosphatase family protein	28.475	25.528	24.256	27.454	27.693	22.036		class 3	4.83162
TGME49_300310	26S proteasome regulatory subunit, S6a family AAA ATpase	28.441	28.548	27.48	30.058	28.329	27.061		class 3	4.8299
TGME49_459030	18S ribosomal RNA	28.407	31.023	40.136	20.354	47.889	78.603		class 3	4.82817
TGME49_293040	hypothetical protein	28.392	26.273	25.095	29.366	26.429	26.428		class 3	4.82741
TGME49_309930	melibiase subfamily protein	28.379	25.567	32.776	25.875	26.954	29.374		class 3	4.82675
TGME49_219860	replication licensing factor, putative	28.337	27.142	28.693	26.659	26.982	29.536		class 3	4.82462
TGME49_315500	hypothetical protein	28.324	28.821	31.345	31.729	29.593	30.777		class 3	4.82395
TGME49_312105	hypothetical protein	28.323	27.039	29.914	31.731	30.161	27.927		class 3	4.8239
TGME49_293590	3-oxoacyl-acyl-carrier protein synthase I/II, putative	28.296	28.371	29.897	28.239	28.845	29.996		class 3	4.82253
TGME49_269330	hypothetical protein	28.261	27.491	28.061	29.445	30.237	29.463		class 3	4.82074
TGME49_220390	hypothetical protein	28.258	25.998	28.433	27.63	28.293	26.774		class 3	4.82059
TGME49_275450	hypothetical protein	28.255	27.801	24.835	25.52	27.88	23.755		class 3	4.82043
TGME49_240810	hypothetical protein	28.248	28.048	27.18	29.057	30.83	27.137		class 3	4.82008
TGME49_212250	XPG N-terminal domain-containing protein	28.24	29.15	26.249	27.355	28.315	26.99		class 3	4.81967
TGME49_460670	18S ribosomal RNA	28.228	29.828	40.293	22.165	46.071	82.164		class 3	4.81906
TGME49_235620	deoxyhypusine synthase	28.225	31.087	29.702	31.83	28.092	28.079		class 3	4.8189
TGME49_312530	splicing factor, CC1 family protein	28.214	25.764	24.885	27.327	27.107	24.434		class 3	4.81834
TGME49_311800	endonuclease/exonuclease/phosphatase family protein	28.166	29.301	30.252	28.935	27.824	30.566		class 3	4.81588
TGME49_252310	hypothetical protein	28.162	28.929	33.061	30.573	26.006	31.217		class 3	4.81568
TGME49_234310	hypothetical protein	28.158	27.973	29.945	28.991	27.212	30.515		class 3	4.81547
TGME49_320630	phosphotransferase enzyme family protein	28.157	29.976	27.833	27.852	27.956	25.474		class 3	4.81542
TGME49_459570	18S ribosomal RNA	28.154	29.949	40.281	20.674	46.55	74.844		class 3	4.81527
TGME49_460120	18S ribosomal RNA	28.14	31.934	42.372	23.38	49.871	86.884		class 3	4.81455
TGME49_308093	rhoptry kinase family protein (incomplete catalytic triad)	28.122	23.301	34.356	26.863	23.188	32.863		class 3	4.81363
TGME49_292120	membrane occupation and recognition nexus protein MORN2	28.096	26.591	25.333	27.336	29.1	26.457		class 3	4.81229
TGME49_268720	Hrf1 family protein	28.08	28.297	27.62	27.058	25.591	28.2		class 3	4.81147
TGME49_221270	oxidoreductase, 2OG-Fe(II) oxygenase family protein	28.065	30.282	29.033	28.77	30.21	29.647		class 3	4.8107
TGME49_251530	hypothetical protein	28.065	23.614	29.465	28.483	25.998	26.956		class 3	4.8107
TGME49_257480	NADP-dependent succinate-semialdehyde dehydrogenase	28.041	29.565	31.76	31.039	32.55	31.869		class 3	4.80947
TGME49_289710	AP2 domain transcription factor AP2IX-5	27.973	26.34	31.356	28.655	29.853	29.691		class 3	4.80596
TGME49_458820	18S ribosomal RNA	27.95	27.618	45.48	22.736	46.597	82.179		class 3	4.80478
TGME49_304460	zinc finger, C3HC4 type (RING finger) domain-containing protein	27.944	26.669	29.157	28.154	27.269	28.449		class 3	4.80447
TGME49_221295	hypothetical protein	27.917	26.545	26.418	28.412	26.746	24.959		class 3	4.80307
TGME49_246770	hypothetical protein	27.906	26.89	27.279	29.066	28.126	26.991		class 3	4.8025
TGME49_255650	DHHC zinc finger domain-containing protein	27.905	27.154	32.125	29.081	26.861	31.195		class 3	4.80245
TGME49_226980	hypothetical protein	27.879	30.516	25.874	27.152	28.639	28.842		class 3	4.80111
TGME49_269250	Mov34/MPN/PAD-1 family protein	27.868	26.967	27.068	30.437	27.188	30.791		class 3	4.80054
TGME49_289990	hypothetical protein	27.852	24.166	27.893	28.037	26.434	27.166		class 3	4.79971
TGME49_227840	Memo family protein	27.838	26.1	27.072	25.652	26.18	26.88		class 3	4.79898
TGME49_282210	AP2 domain transcription factor AP2VIIa-8	27.811	28.035	30.633	27.072	31.227	31.924		class 3	4.79758
TGME49_268950	hypothetical protein	27.774	29.37	28.4	28.26	28.569	26.507		class 3	4.79566
TGME49_275460	hypothetical protein	27.747	30.679	25.062	28.292	27.951	24.788		class 3	4.79426
TGME49_220630	hypothetical protein	27.745	28.099	34.63	25.382	27.133	32.748		class 3	4.79416
TGME49_231230	hypothetical protein	27.743	22.011	24.806	16.856	23.639	24.168		class 3	4.79405
TGME49_313400	DnaJ domain-containing protein	27.719	29.242	30.184	27.728	28.419	28.96		class 3	4.7928
TGME49_460610	18S ribosomal RNA	27.609	30.213	44.194	25.513	51.985	84.108		class 3	4.78707
TGME49_220890	hypothetical protein	27.602	25.54	29.658	29.009	24.382	27.853		class 3	4.7867
TGME49_209080	transport protein particle (trapp) component, bet3 protein	27.6	28.634	27.432	25.772	29.204	27.871		class 3	4.7866
TGME49_309200	zinc finger (CCCH type) motif-containing protein	27.587	29.004	27.613	24.53	29.441	27.692		class 3	4.78592
TGME49_209095	hypothetical protein	27.585	27.466	28.699	29.705	28.369	25.602		class 3	4.78581
TGME49_216970	coronin, putative	27.572	29.263	26.823	28.405	27.466	26.54		class 3	4.78513
TGME49_280750	rudimentary enhancer, putative	27.561	27.909	26.595	29.288	27.438	28.231		class 3	4.78456
TGME49_263990	hypothetical protein	27.535	26.634	28.158	26.992	28.56	26.53		class 3	4.78319
TGME49_263810	hypothetical protein	27.533	28.322	27.474	29.378	28.479	26.436		class 3	4.78309
TGME49_458660	28S ribosomal RNA	27.526	37.504	54.223	25.639	45.626	85.469		class 3	4.78272
TGME49_217750	hypothetical protein	27.525	30.275	27.094	29.725	33.295	32.408		class 3	4.78267
TGME49_233695	hypothetical protein	27.456	31.89	25.457	27.74	27.251	27.81		class 3	4.77905
TGME49_273790	hypothetical protein	27.433	26.674	25.711	27.573	26.708	24.657		class 3	4.77784
TGME49_252430	hypothetical protein	27.421	28.14	26.213	29.506	30.284	24.984		class 3	4.77721
TGME49_267390	DNA-directed RNA polymerase I RPAC1	27.414	27.219	22.18	27.316	27.503	24.745		class 3	4.77684
TGME49_269650	FFD and TFG box motifs protein	27.41	27.89	27.706	28.086	28.713	25.368		class 3	4.77663
TGME49_254610	Tim10/DDP family zinc finger superfamily protein	27.409	27.306	25.988	26.028	29.491	29.993		class 3	4.77658
TGME49_322600	hypothetical protein	27.381	23.187	17.853	30.064	23.173	20.246		class 3	4.7751
TGME49_202380	rab GDI alpha, putative	27.323	28.222	28.994	27.066	27.324	29.704		class 3	4.77204
TGME49_270330	cell-cycle-associated protein kinase, putative	27.272	27.789	23.822	23.356	25.353	25.236		class 3	4.76935
TGME49_273050	hypothetical protein	27.271	27.373	28.809	25.276	25.518	24.968		class 3	4.7693
TGME49_265650	protein phosphatase 2C domain-containing protein	27.254	31.693	29.083	28.756	27.551	28.345		class 3	4.7684
TGME49_248400	glyoxalase I, putative	27.251	24.896	28.748	25.084	25.163	27.705		class 3	4.76824
TGME49_246080	NAD dependent epimerase/dehydratase family protein	27.201	26.738	29.355	25.19	27.737	28.193		class 3	4.76559
TGME49_213820	hypothetical protein	27.2	25.085	32.718	28.027	24.573	30.42		class 3	4.76553
TGME49_225550	phosphatidylserine decarboxylase	27.183	27.246	26.73	28.455	28.476	26.436		class 3	4.76463
TGME49_461360	28S ribosomal RNA	27.111	39.719	51.774	23.922	50.677	94.467		class 3	4.76081
TGME49_261075	hypothetical protein	27.104	30.105	25.419	28.844	25.792	21.777		class 3	4.76043
TGME49_220100	phosphoribosylpyrophosphate synthetase	27.081	29.543	26.307	28.714	31.96	27.666		class 3	4.75921
TGME49_459700	18S ribosomal RNA	27.075	31.285	44.6	20.556	46.088	78.827		class 3	4.75889
TGME49_310950	AP2 domain transcription factor AP2XI-3	27.053	25.904	24.141	26.378	26.756	23.913		class 3	4.75772
TGME49_209850	RNA recognition motif-containing protein	27.03	26.677	24.673	27.313	29.609	23.036		class 3	4.75649
TGME49_207690	programmed cell death 5 protein	27.011	27.738	29.025	28.365	30.466	31.391		class 3	4.75548
TGME49_297470	myosin light chain 2, putative	26.998	28.377	28.269	25.151	27.422	26.16		class 3	4.75478
TGME49_266810	hypothetical protein	26.992	32.032	30.476	27.213	31.285	27.833		class 3	4.75446
TGME49_244390	coatomer epsilon subunit protein	26.989	28.566	30.171	27.406	27.962	30.217		class 3	4.7543
TGME49_248660	hypothetical protein	26.987	29.021	27.303	29.222	28.904	27.514		class 3	4.75419
TGME49_225580	proteasome (prosome, macropain) 26S subunit, non-ATPase, 9, putative	26.924	26.126	29.092	28.893	26.789	28.5		class 3	4.75082
TGME49_244370	TDC1, putative	26.921	29.306	28.178	25.493	27.886	27.701		class 3	4.75066
TGME49_239270	hypothetical protein	26.904	21.812	29.701	24.493	22.001	28.287		class 3	4.74975
TGME49_315270	hypothetical protein	26.881	25.564	27.478	26.289	24.417	27.347		class 3	4.74851
TGME49_458960	18S ribosomal RNA	26.876	32.781	42.295	21.527	47.529	81.634		class 3	4.74825
TGME49_290290	ubiquitin-activating enzyme E1 family protein	26.873	27.901	27.132	27.814	28.58	27.007		class 3	4.74809
TGME49_215610	hypothetical protein	26.828	27.033	20.723	25.422	25.74	25.182		class 3	4.74567
TGME49_249340	hypothetical protein	26.819	24.929	28.163	27.221	25.489	27.542		class 3	4.74518
TGME49_321550	hypothetical protein	26.816	25.469	24.996	27.18	25.895	23.711		class 3	4.74502
TGME49_235140	hypothetical protein	26.815	23.643	23.23	26.108	23.419	23.915		class 3	4.74497
TGME49_218955	hypothetical protein	26.796	25.992	35.46	34.943	32.418	28.723		class 3	4.74395
TGME49_269417	hypothetical protein	26.79	24.31	23.56	26.79	22.78	20.442		class 3	4.74362
TGME49_253640	hypothetical protein	26.783	24.51	25.071	23.149	23.288	23.088		class 3	4.74325
TGME49_308075	hypothetical protein	26.712	25.868	23.978	23.837	22.46	25.581		class 3	4.73942
TGME49_218850	ribosomal protein RPS9	26.701	29.292	32.181	29.96	26.29	34.771		class 3	4.73882
TGME49_457760	18S ribosomal RNA	26.696	31.404	41.591	23.397	49.382	79.529		class 3	4.73855
TGME49_208570	ubiquitin conjugating enzyme E2, putative	26.676	25.388	24.407	27.671	26.352	24.649		class 3	4.73747
TGME49_458780	18S ribosomal RNA	26.673	27.734	39.584	21.848	43.991	72.734		class 3	4.73731
TGME49_223840	ATP-citrate lyase, putative	26.664	26.783	25.182	26.6	29.224	23.714		class 3	4.73682
TGME49_460600	18S ribosomal RNA	26.641	29.266	39.648	21.235	49.379	76.445		class 3	4.73558
TGME49_203040	hypothetical protein	26.637	24.857	24.289	23.887	26.764	23.483		class 3	4.73536
TGME49_225830	hypothetical protein	26.578	24.705	28.737	27.167	26.072	27.949		class 3	4.73216
TGME49_323400	cytochrome c oxidase subunit iii subfamily protein	26.532	22.877	18.211	24.036	22.766	19.702		class 3	4.72966
TGME49_460680	18S ribosomal RNA	26.49	25.533	38.617	21.199	47.619	75.86		class 3	4.72738
TGME49_285930	hypothetical protein	26.481	26.497	26.001	25.813	26.911	25.358		class 3	4.72689
TGME49_273960	chaperonin GroS protein	26.473	27.016	26.131	26.386	26.668	25.702		class 3	4.72645
TGME49_278700	hypothetical protein	26.459	29.244	25.753	25.266	28.163	25.256		class 3	4.72569
TGME49_219540	cytosolic tRNA-Ala synthetase	26.433	25.987	23.54	25.832	27.49	22.384		class 3	4.72427
TGME49_238180	26s proteasome regulatory complex subunit, putative	26.415	27.225	26.337	27.293	27.145	27.078		class 3	4.72329
TGME49_461270	28S ribosomal RNA	26.389	39.749	48.453	21.327	43.632	87.463		class 3	4.72186
TGME49_230980	myosin I	26.358	26.782	25.064	25.696	29.171	24.996		class 3	4.72017
TGME49_285180	hypothetical protein	26.345	28.803	27.065	27.798	27.261	23.999		class 3	4.71946
TGME49_260220	folate/biopterin transporter subfamily protein	26.292	27.012	27.46	24.62	25.644	28.047		class 3	4.71655
TGME49_306380	U1 zinc finger protein	26.272	23.811	24.835	25.398	26.316	24.233		class 3	4.71545
TGME49_200240	microneme protein MIC17B	26.264	19.321	27.687	31.439	18.987	26.129		class 3	4.71501
TGME49_277990	OTU family cysteine protease	26.216	25.855	23.614	24.788	26.264	22.68		class 3	4.71238
TGME49_277250	tRNA-Ala	26.21	27.253	19.859	25.144	25.794	34.064		class 3	4.71205
TGME49_200330	hypothetical protein	26.204	26.53	26.082	23.228	25.001	23.805		class 3	4.71172
TGME49_460000	18S ribosomal RNA	26.197	30.15	38.414	20.575	45.711	81.468		class 3	4.71133
TGME49_259970	hypothetical protein	26.111	24.709	26.219	24.639	24.345	25.228		class 3	4.70659
TGME49_260580	hypothetical protein	26.099	23.574	28.164	24.554	22.155	25.817		class 3	4.70592
TGME49_223930	RNA recognition motif-containing protein	26.048	28.652	27.864	27.252	26.179	27.603		class 3	4.7031
TGME49_459630	18S ribosomal RNA	26.019	30.697	42.467	20.31	46.851	78.532		class 3	4.70149
TGME49_232650	hypothetical protein	26.001	29.549	22.277	24.57	26.205	22.009		class 3	4.7005
TGME49_264900	hypothetical protein	25.985	22.274	25.473	25.681	21.601	24.615		class 3	4.69961
TGME49_269425	hypothetical protein	25.981	24.054	21.764	27.611	26.872	20.431		class 3	4.69939
TGME49_254630	CMGC kinase	25.979	25.705	30.346	24.611	25.982	27.235		class 3	4.69927
TGME49_271033	hypothetical protein	25.968	29.552	27.489	22.111	26.582	28.743		class 3	4.69866
TGME49_217460	glutaminyl-tRNA synthetase (GlnRS)	25.964	28.86	25.723	25.981	29.398	24.595		class 3	4.69844
TGME49_247020	high mobility group protein b1, putative	25.964	25.124	27.989	26.999	24.202	28.47		class 3	4.69844
TGME49_457610	18S ribosomal RNA	25.95	31.083	40.321	23.107	46.202	77.069		class 3	4.69766
TGME49_310600	heat shock factor binding protein 1 protein	25.928	25.748	24.016	26.63	28.299	25.445		class 3	4.69644
TGME49_215450	aquaporin 1	25.925	24.322	25.61	27.145	23.924	24.4		class 3	4.69627
TGME49_262380	elongation factor Tu, putative	25.918	25.256	23.951	25.658	27.984	26.931		class 3	4.69588
TGME49_257740	UMP-CMP kinase	25.896	27.051	27.146	24.17	26.878	26.805		class 3	4.69466
TGME49_239800	hypothetical protein	25.887	28.679	28.224	24.415	28.464	27.368		class 3	4.69416
TGME49_247230	centrin	25.88	27.749	26.396	27.652	24.347	27.815		class 3	4.69377
TGME49_214270	translation initiation factor IF-2, putative	25.869	26.536	25.159	24.359	26.996	23.812		class 3	4.69315
TGME49_307570	glycerol-3-phosphate dehydrogenase (gpdh), putative	25.866	21.673	24.428	25.298	24.305	24.22		class 3	4.69299
TGME49_460090	18S ribosomal RNA	25.836	23.763	34.356	17.649	43.437	68.116		class 3	4.69131
TGME49_273520	PCI domain-containing protein	25.834	27.114	23.788	26.784	26.367	24.569		class 3	4.6912
TGME49_261720	metal cation transporter, ZIP family protein	25.808	24.811	25.828	25.888	25.197	28.755		class 3	4.68975
TGME49_245630	hypothetical protein	25.803	27.394	23.515	28.785	27.487	25.71		class 3	4.68947
TGME49_311040	hypothetical protein	25.793	28.141	29.47	28.961	28.726	28.578		class 3	4.68891
TGME49_308050	thioredoxin domain-containing protein	25.781	25.136	28.208	27.112	26.502	28.114		class 3	4.68824
TGME49_292375	KRUF family protein	25.765	23.773	25.42	22.545	23.791	23.458		class 3	4.68734
TGME49_226310	zinc finger (CCCH type) motif-containing protein	25.763	25.107	40.601	25.437	26.1	38.663		class 3	4.68723
TGME49_209800	formate/nitrite transporter protein	25.755	24.808	23.364	25.882	26.603	24.424		class 3	4.68678
TGME49_239780	hypothetical protein	25.721	20.175	26.526	24.227	19.254	25.626		class 3	4.68487
TGME49_308950	histidine acid phosphatase superfamily protein	25.666	25.989	19.571	24.087	26.47	19.751		class 3	4.68179
TGME49_205710	lysine-tRNA ligase	25.63	22.974	23.925	26.382	25.869	24.191		class 3	4.67976
TGME49_461500	28S ribosomal RNA	25.625	42.631	55.208	27.284	50.023	100		class 3	4.67948
TGME49_287970	hypothetical protein	25.617	24.927	27.485	23.718	25.131	26.124		class 3	4.67903
TGME49_225470	peptide methionine sulfoxide reductase	25.61	28.13	25.214	28.988	28.429	24.232		class 3	4.67864
TGME49_243800	long-chain fatty acid CoA ligase, putative	25.568	25.829	26.933	26.622	25.467	25.663		class 3	4.67627
TGME49_265070	hypothetical protein	25.526	26.962	28.81	28.633	26.464	28.375		class 3	4.6739
TGME49_300250	MtN3/saliva family protein	25.493	25.57	24.955	26.887	27.209	26.595		class 3	4.67203
TGME49_299670	hypothetical protein	25.47	26.692	24.772	25.915	26.097	25.933		class 3	4.67073
TGME49_266760	isocitrate dehydrogenase	25.468	24.755	28.562	25.995	23.926	28.853		class 3	4.67061
TGME49_205030	hypothetical protein	25.41	27.719	27.233	28.831	28.177	29.921		class 3	4.66732
TGME49_209050	Tyrosine kinase-like (TKL) protein	25.387	28.135	24.582	25.29	27.464	25.244		class 3	4.66602
TGME49_258800	rhoptry kinase family protein ROP31	25.375	25.928	31.791	26.496	23.759	27.872		class 3	4.66534
TGME49_245470	mitotic checkpoint protein, BUB3 family protein	25.33	25.138	22.981	24.552	25.097	23.435		class 3	4.66278
TGME49_247580	glutaredoxin domain-containing protein	25.306	26.133	24.13	23.768	26.9	23.984		class 3	4.66141
TGME49_254520	mediator complex subunit MED11	25.299	25.503	26.791	27.331	24.241	27.235		class 3	4.66101
TGME49_459410	18S ribosomal RNA	25.272	29.365	36.687	19.82	48.286	73.486		class 3	4.65947
TGME49_247960	hypothetical protein	25.254	25.139	31.865	25.224	23.093	30.399		class 3	4.65844
TGME49_252440	peptidase c13 family protein	25.212	26.516	24.851	30.23	28.509	24.106		class 3	4.65604
TGME49_460580	28S ribosomal RNA	25.212	36.126	49.593	24.148	45.123	89.586		class 3	4.65604
TGME49_258060	myosin heavy chain, putative	25.18	25.486	23.32	26.632	25.1	21.957		class 3	4.65421
TGME49_254650	zinc finger protein	25.174	26.443	26.04	25.438	25.838	24.063		class 3	4.65386
TGME49_214400	hypothetical protein	25.171	27.215	26.476	25.4	26.107	27.671		class 3	4.65369
TGME49_227952	14-3-3 superfamily protein	25.15	27.584	23.77	25.351	27.769	23.213		class 3	4.65249
TGME49_255660	EF hand domain-containing protein	25.142	23.982	24.622	29.12	29.747	26.635		class 3	4.65203
TGME49_458340	28S ribosomal RNA	25.132	37.549	46.109	21.567	42.547	87.687		class 3	4.65145
TGME49_458400	18S ribosomal RNA	25.127	25.909	33.997	17.77	42.458	66.807		class 3	4.65117
TGME49_457980	28S ribosomal RNA	25.125	34.162	46.37	21.464	44.139	91.054		class 3	4.65105
TGME49_310080	AMP-binding enzyme domain-containing protein	25.097	21.516	26.01	22.525	24.401	25.234		class 3	4.64944
TGME49_250870	DHHC zinc finger domain-containing protein	25.039	24.756	24.295	24.42	24.615	24.272		class 3	4.64611
TGME49_312490	hypothetical protein	25.033	23.175	24.871	25.076	25.539	24.174		class 3	4.64576
TGME49_264610	RNA recognition motif-containing protein	25.027	23.112	23.893	26.049	24.24	21.055		class 3	4.64541
TGME49_262170	hypothetical protein	25.017	25.357	23.214	24.113	25.669	25.572		class 3	4.64484
TGME49_201840	aspartyl protease ASP1	25.002	20.794	21.292	22.92	21.432	20.923		class 3	4.64397
TGME49_285840	RAP domain-containing protein	24.995	27.84	27.651	25.211	26.225	26.623		class 3	4.64357
TGME49_288600	WD domain, G-beta repeat-containing protein	24.994	27.926	25.367	24.385	25.599	24.866		class 3	4.64351
TGME49_221250	hypothetical protein	24.988	23.987	28.231	23.5	26.937	26.313		class 3	4.64316
TGME49_232960	oxidoreductase, 2OG-Fe(II) oxygenase family protein	24.968	25.514	24.868	27.169	25.499	25.971		class 3	4.64201
TGME49_263240	hypothetical protein	24.965	24.131	32.535	31.128	25.983	31.118		class 3	4.64184
TGME49_263070	CMGC kinase, CK2 family	24.955	24.505	21.822	21.595	25.405	21.059		class 3	4.64126
TGME49_213830	Ufm1-conjugating enzyme 1, putative	24.95	25.671	24.209	26.354	23.077	26.017		class 3	4.64097
TGME49_251840	hypothetical protein	24.947	24.059	25.66	26.189	23.097	25.166		class 3	4.64079
TGME49_254770	Ser/Thr phosphatase family protein	24.894	25.698	24.095	23.72	22.663	22.191		class 3	4.63773
TGME49_268570	zinc finger (CCCH type) motif-containing protein	24.893	23.906	23.632	25.121	24.604	21.413		class 3	4.63767
TGME49_270050	hypothetical protein	24.879	25.211	22.862	22.112	24.629	21.685		class 3	4.63686
TGME49_240500	hypothetical protein	24.877	25.089	23.711	23.016	24.018	24.345		class 3	4.63674
TGME49_275640	hypothetical protein	24.854	26.425	22.981	22.38	23.914	23.201		class 3	4.63541
TGME49_291630	hypothetical protein	24.854	23.864	28.661	24.38	21.235	28.296		class 3	4.63541
TGME49_319920	2-oxo acid dehydrogenases acyltransferase (catalytic domain) domain-containing protein	24.854	27.122	25.481	26.01	25.997	24.935		class 3	4.63541
TGME49_266620	thioredoxin domain-containing protein	24.847	24.859	27.018	25.053	22.246	25.836		class 3	4.635
TGME49_248190	hypothetical protein	24.788	23.615	25.364	24.751	25.301	24.018		class 3	4.63157
TGME49_295980	hypothetical protein	24.783	24.352	26.717	27.301	25.109	26.327		class 3	4.63128
TGME49_310590	hypothetical protein	24.779	24.823	25.809	23.373	22.521	23.725		class 3	4.63105
TGME49_219175	hypothetical protein	24.775	24.907	23.138	25.152	27.024	24.303		class 3	4.63081
TGME49_275610	protein kinase, other	24.764	22.008	26.326	22.577	24.233	25.45		class 3	4.63017
TGME49_310770	hypothetical protein	24.759	24.454	25.551	25.017	22.381	25.813		class 3	4.62988
TGME49_457310	18S ribosomal RNA	24.736	25.286	32.903	19.134	45.36	76.499		class 3	4.62854
TGME49_323010	hypothetical protein	24.73	23.494	21.085	23.34	27.253	20.253		class 3	4.62819
TGME49_315110	prefoldin, alpha subunit protein	24.726	23.32	22.896	26.591	25.155	21.767		class 3	4.62796
TGME49_240540	hypothetical protein	24.724	22.358	25.645	24.022	21.577	23.931		class 3	4.62784
TGME49_209112	hypothetical protein	24.698	27.338	27.234	33.929	30.437	34.106		class 3	4.62632
TGME49_294630	hypothetical protein	24.68	23.981	21.538	24.327	24.408	21.837		class 3	4.62527
TGME49_458080	28S ribosomal RNA	24.667	32.55	44.265	20.029	41.552	83.707		class 3	4.62451
TGME49_289320	casein kinase I, putative	24.657	24.228	22.426	22.853	23.696	21.987		class 3	4.62393
TGME49_287460	hypothetical protein	24.651	33.798	34.128	23.955	27.869	25.457		class 3	4.62357
TGME49_459160	18S ribosomal RNA	24.649	23.228	32.091	16.409	37.554	61.981		class 3	4.62346
TGME49_270120	thioredoxin-like protein TLP1	24.644	25.887	24.538	24.721	23.887	23.622		class 3	4.62316
TGME49_235700	sedoheptulose-1,7-bisphosphatase	24.624	26.671	25.796	25.929	24.452	26.367		class 3	4.62199
TGME49_459120	18S ribosomal RNA	24.611	22.843	34.435	17.774	39.111	64.362		class 3	4.62123
TGME49_322700	collagen, putative	24.611	20.081	23.704	24.17	23.186	24.62		class 3	4.62123
TGME49_460560	18S ribosomal RNA	24.61	28.652	32.453	18.608	41.728	61.379		class 3	4.62117
TGME49_216055	hypothetical protein	24.601	23.724	24.661	25.628	23.57	23.83		class 3	4.62065
TGME49_208970	RNA recognition motif-containing protein	24.593	21.427	26.767	23.335	23.585	26.649		class 3	4.62018
TGME49_215590	flavoprotein subunit of succinate dehydrogenase	24.588	24.689	23.479	25.03	25.555	23.306		class 3	4.61988
TGME49_290160	sortilin, putative	24.579	23.844	22.595	24.212	25.2	22.992		class 3	4.61935
TGME49_224960	hypothetical protein	24.547	25.654	27.159	24.1	22.758	26.743		class 3	4.61747
TGME49_206510	toxolysin TLN4	24.531	23.419	21.42	23.176	24.587	20.499		class 3	4.61653
TGME49_460330	18S ribosomal RNA	24.521	24.123	37.259	18.921	46.087	66.138		class 3	4.61595
TGME49_458690	18S ribosomal RNA	24.506	20.384	30.945	18.432	37.103	61.929		class 3	4.61506
TGME49_280522	hypothetical protein	24.499	22.909	23.756	23.135	22.565	22.37		class 3	4.61465
TGME49_229030	hypothetical protein	24.489	26.196	30.321	27.529	28.488	28.737		class 3	4.61406
TGME49_312210	hypothetical protein	24.485	24.348	22.381	23.298	23.797	20.39		class 3	4.61383
TGME49_459940	28S ribosomal RNA	24.484	37.111	47.308	20.744	44.251	84.2		class 3	4.61377
TGME49_458370	18S ribosomal RNA	24.474	31.214	35.625	19.351	44.555	68.357		class 3	4.61318
TGME49_210820	hypothetical protein	24.474	23.488	25.563	23.969	25.327	26.402		class 3	4.61318
TGME49_460640	18S ribosomal RNA	24.426	19.108	30.424	15.664	41.445	67.605		class 3	4.61035
TGME49_461290	18S ribosomal RNA	24.424	28.377	33.071	16.965	42.381	64.47		class 3	4.61023
TGME49_225230	hypothetical protein	24.42	24.455	25.486	25.272	26.641	23.981		class 3	4.60999
TGME49_225250	LSU ribosomal protein L14P, putative	24.415	24.476	20.738	21.569	22.795	19.514		class 3	4.6097
TGME49_201630	protein phosphatase 2C domain-containing protein	24.408	20.838	26.657	22.784	19.374	24.088		class 3	4.60928
TGME49_210220	hypothetical protein	24.395	26.46	17.258	29.298	24.998	21.586		class 3	4.60851
TGME49_254460	hypothetical protein	24.34	24.255	22.733	25.616	24.697	24.555		class 3	4.60526
TGME49_289290	hypothetical protein	24.325	24.076	21.852	24.119	25.949	21.877		class 3	4.60437
TGME49_295910	ATP-dependent Clp protease adaptor protein ClpS protein	24.325	25.266	23.557	23.283	25.002	24.213		class 3	4.60437
TGME49_314740	PSP protein	24.297	24.96	21.886	23.81	25.368	23.062		class 3	4.60271
TGME49_215070	ferodoxin FD	24.285	23.826	23.153	24.569	25.264	24.614		class 3	4.60199
TGME49_268590	rhomboid protease ROM4	24.258	25.629	23.95	22.841	25.621	23.363		class 3	4.60039
TGME49_221530	hypothetical protein	24.242	24.816	27.106	24.709	25.618	28.105		class 3	4.59944
TGME49_295460	Got1 family protein	24.238	20.447	26.313	26.749	24.933	22.607		class 3	4.5992
TGME49_231910	ATP synthase F1 gamma subunit	24.234	24.454	24.043	25.093	23.925	23.501		class 3	4.59896
TGME49_304760	RNA recognition motif-containing protein	24.23	21.671	20.822	23.743	24.172	20.094		class 3	4.59872
TGME49_209120	hypothetical protein	24.2	24.746	24.514	25.534	24.334	24.37		class 3	4.59694
TGME49_238895	hypothetical protein	24.164	24.535	26.805	23.74	23.312	25.42		class 3	4.59479
TGME49_247000	tetratricopeptide repeat-containing protein	24.158	22.42	23.304	24.618	23.313	23.362		class 3	4.59443
TGME49_266368	hypothetical protein	24.147	22.664	20.2	20.762	26.74	21.225		class 3	4.59377
TGME49_262120	IQ calmodulin-binding motif domain-containing protein	24.146	21.911	21.892	21.433	22.374	22.433		class 3	4.59371
TGME49_461440	18S ribosomal RNA	24.123	30.099	36.535	19.402	41.608	70.485		class 3	4.59234
TGME49_311880	hypothetical protein	24.117	21.762	25.997	22.982	22.185	26.452		class 3	4.59198
TGME49_201700	WD domain, G-beta repeat-containing protein	24.115	25.345	26.806	26.071	26.155	26.376		class 3	4.59186
TGME49_310900	AP2 domain transcription factor AP2XI-2	24.101	22.528	23.122	23.601	26.488	22.626		class 3	4.59102
TGME49_270640	RNA recognition motif-containing protein	24.098	23.193	25.866	24.884	21.386	24.007		class 3	4.59084
TGME49_205640	hypothetical protein	24.057	21.87	27.084	23.971	22.873	24.167		class 3	4.58838
TGME49_204480	thioredoxin domain-containing protein	24.036	23.502	25.184	24.606	24.901	24.926		class 3	4.58712
TGME49_458440	18S ribosomal RNA	24.009	25.913	37.067	19.076	40.338	67.32		class 3	4.5855
TGME49_310430	Hsp90 domain-containing protein	23.989	22.699	22.544	23.367	23.736	23.051		class 3	4.5843
TGME49_232370	CW-type Zinc Finger protein	23.98	23.117	24.001	23.91	24.925	24.768		class 3	4.58376
TGME49_458870	18S ribosomal RNA	23.974	26.621	31.785	19.427	43.793	71.56		class 3	4.5834
TGME49_223080	hypothetical protein	23.969	23.92	23.606	22.687	24.382	21.901		class 3	4.5831
TGME49_252200	cell cycle regulator with zn-finger domain-containing protein	23.965	23.593	26.156	25.689	22.225	27.5		class 3	4.58286
TGME49_277700	ribosomal protein S14 precursor, putative	23.964	23.464	22.131	24.968	23.824	20.367		class 3	4.5828
TGME49_313418	hypothetical protein	23.963	25.806	22.483	23.117	24.239	22.787		class 3	4.58274
TGME49_222400	hypothetical protein	23.953	22.415	24.475	25.724	23.05	24.253		class 3	4.58213
TGME49_229470	hypothetical protein	23.929	25.446	26.857	24.439	26.118	25.991		class 3	4.58069
TGME49_461300	18S ribosomal RNA	23.879	27.909	32.847	18.67	45.851	72.152		class 3	4.57767
TGME49_458510	18S ribosomal RNA	23.878	24.108	34.941	18.692	42.38	68.309		class 3	4.57761
TGME49_242230	rhoptry kinase family protein ROP29	23.863	24.415	22.353	23.532	24.382	22.649		class 3	4.5767
TGME49_297400	hypothetical protein	23.847	22.016	20.376	22.34	21.238	19.61		class 3	4.57574
TGME49_255400	hypothetical protein	23.841	20.929	24.057	23.806	20.096	24.687		class 3	4.57537
TGME49_458220	18S ribosomal RNA	23.834	19.275	30.336	17.588	36.846	73.616		class 3	4.57495
TGME49_201130	rhoptry kinase family protein ROP33	23.817	21.811	25.336	22.157	22.211	21.611		class 3	4.57392
TGME49_309040	hypothetical protein	23.814	23.352	26.543	25.967	24.053	25.532		class 3	4.57374
TGME49_213690	ring box protein 1 family protein	23.805	24.883	24.915	24.617	24.297	25.165		class 3	4.57319
TGME49_458380	18S ribosomal RNA	23.79	28.912	38.29	20.98	42.771	75.654		class 3	4.57228
TGME49_207620	pyridine nucleotide-disulfide oxidoreductase domain-containing protein	23.79	24.566	23.446	25.066	24.62	23.933		class 3	4.57228
TGME49_231380	DNA-directed RNA polymerase II RPB4	23.788	26.493	26.347	23.124	23.789	25.564		class 3	4.57216
TGME49_287160	internal kinesin motor domain protein	23.779	21.422	24.792	22.794	23.489	24.234		class 3	4.57162
TGME49_241880	3'5'-cyclic nucleotide phosphodiesterase domain-containing protein	23.758	20.409	23.106	23.346	21.712	23.26		class 3	4.57034
TGME49_234950	protein kinase (incomplete catalytic triad)	23.747	23.959	25.974	24.532	25.789	26.058		class 3	4.56967
TGME49_217900	hypothetical protein	23.744	25.13	24.407	25.841	28.42	25.962		class 3	4.56949
TGME49_460220	28S ribosomal RNA	23.729	31.069	41.537	21.957	40.475	79.59		class 3	4.56858
TGME49_459590	28S ribosomal RNA	23.694	33.7	42.256	19.569	39.62	80.51		class 3	4.56645
TGME49_460190	18S ribosomal RNA	23.689	29.557	34.187	17.212	42.916	64.602		class 3	4.56615
TGME49_460400	18S ribosomal RNA	23.687	24.35	33.674	18.236	40.887	68.692		class 3	4.56602
TGME49_226720	translin family protein	23.646	20.407	22.494	24.342	21.264	23.49		class 3	4.56352
TGME49_258950	lectin family protein	23.617	22.809	23.774	23.072	23.402	22.863		class 3	4.56175
TGME49_239790	BRCA1 C Terminus (BRCT) domain-containing protein	23.599	23.057	20.712	22.351	23.826	19.378		class 3	4.56065
TGME49_458210	18S ribosomal RNA	23.596	26.978	36.974	18.032	43.421	63.622		class 3	4.56047
TGME49_307260	Toxoplasma gondii family C protein	23.57	26.704	24.093	26.174	23.912	26.729		class 3	4.55888
TGME49_269700	NLI interacting factor family phosphatase	23.56	23.384	22.196	21.344	23.014	22.348		class 3	4.55827
TGME49_202610	protein phosphatase 2C domain-containing protein	23.558	20.088	19.661	20.748	21.586	19.164		class 3	4.55815
TGME49_266990	beta-COP	23.532	23.685	22.839	22.94	24.422	21.929		class 3	4.55655
TGME49_306030	glutathione s-transferase, n-terminal domain containing protein	23.461	23.285	23.109	22.769	20.881	24.427		class 3	4.55219
TGME49_294830	methyltransferase domain-containing protein	23.456	24.258	25.459	23.706	25.836	24.838		class 3	4.55189
TGME49_209140	anti-silencing protein, ASF1 family protein	23.386	22.162	23.678	23.517	21.766	23.234		class 3	4.54757
TGME49_251550	acyl-coa-binding protein	23.362	23.126	26.154	27.388	21.442	28.67		class 3	4.54609
TGME49_237070	hypothetical protein	23.35	25.884	24.647	29.317	24.459	29.26		class 3	4.54535
TGME49_232150	hypothetical protein	23.328	23.402	23.486	23.441	24.034	22.724		class 3	4.54399
TGME49_304890	hypothetical protein	23.322	23.315	23.65	21.493	22.209	22.271		class 3	4.54362
TGME49_275750	small nuclear ribonucleoprotein E, putative	23.296	24.578	21.186	25.375	22.643	24.694		class 3	4.54201
TGME49_306330	phospholipase	23.29	25.516	24.934	25.692	28.314	24.039		class 3	4.54164
TGME49_293540	hypothetical protein	23.29	21.591	24.939	21.488	20.687	23.906		class 3	4.54164
TGME49_313820	dynactin p25, putative	23.289	22.204	24.292	24.133	23.024	23.392		class 3	4.54158
TGME49_291140	CCR4-Not complex component, Not1 protein	23.288	21.574	22.091	22.565	24.954	20.004		class 3	4.54151
TGME49_229650	josephin protein	23.28	22.828	21.699	21.022	22.066	20.91		class 3	4.54102
TGME49_266030	pre-mRNA splicing factor, putative	23.261	24.493	22.506	25.365	24.801	22.571		class 3	4.53984
TGME49_457530	18S ribosomal RNA	23.258	29.36	38.449	21.621	45.599	77.045		class 3	4.53966
TGME49_220640	hypothetical protein	23.257	19.829	24.115	20.82	20.761	23.759		class 3	4.53959
TGME49_460500	18S ribosomal RNA	23.248	26.717	32.529	17.861	40.095	68.744		class 3	4.53903
TGME49_254940	MIF4G domain-containing protein	23.228	20.99	20.74	21.746	23.817	18.709		class 3	4.53779
TGME49_255940	hypothetical protein	23.222	22.251	19.964	20.416	22.115	19.856		class 3	4.53742
TGME49_233100	SPFH domain / Band 7 family protein	23.195	22.667	21.669	21.781	22.725	21.644		class 3	4.53574
TGME49_460920	18S ribosomal RNA	23.181	23.362	37.829	17.699	43.811	71.264		class 3	4.53487
TGME49_461240	18S ribosomal RNA	23.18	23.274	35.184	18.218	42.868	71.452		class 3	4.53481
TGME49_321440	SWI2/SNF2 ISWI-like SANT	23.169	21.5	21.326	21.536	22.865	22.579		class 3	4.53412
TGME49_266630	hypothetical protein	23.16	23.697	22.888	22.228	22.148	21.381		class 3	4.53356
TGME49_288680	endonuclease IV APN	23.155	21.059	21.674	23.138	21.35	23.143		class 3	4.53325
TGME49_318360	hypothetical protein	23.118	17.102	19.542	19.815	18.068	20.551		class 3	4.53094
TGME49_269800	glutamine-dependent NAD(+) synthetase protein, putative	23.117	20.603	25.747	21.562	20.934	23.598		class 3	4.53088
TGME49_244670	hypothetical protein	23.099	22.706	22.627	22.9	21.075	21.827		class 3	4.52976
TGME49_257755	hypothetical protein	23.096	23.02	18.749	17.484	23.242	18.113		class 3	4.52957
TGME49_223485	hypothetical protein	23.041	24.813	22.02	23.84	23.024	20.954		class 3	4.52613
TGME49_457730	28S ribosomal RNA	23.036	38.052	46.598	21.762	40.152	86.456		class 3	4.52582
TGME49_218310	microneme protein MIC14	23.03	22.235	24.52	24.475	22.499	23.12		class 3	4.52544
TGME49_200280	WD domain, G-beta repeat-containing protein	23.029	21.998	22.453	22.912	22.054	23.971		class 3	4.52538
TGME49_291310	V-ATPase subunit c' proteolipid, putative	23.028	21.798	21.373	21.579	23.956	21.629		class 3	4.52532
TGME49_459240	28S ribosomal RNA	23.014	33.408	41.843	21.701	41.398	75.211		class 3	4.52444
TGME49_461180	18S ribosomal RNA	23.006	25.054	36.468	19.288	46.705	73.203		class 3	4.52394
TGME49_460530	18S ribosomal RNA	23.002	22.923	34.759	18.186	38.928	64.707		class 3	4.52369
TGME49_266470	hypothetical protein	23.002	24.482	22.796	23.14	24.373	23.556		class 3	4.52369
TGME49_271200	AP2 domain transcription factor AP2VIII-5	22.982	21.045	26.422	21.926	21.621	24.927		class 3	4.52243
TGME49_242118	myosin-light-chain kinase	22.965	24.765	24.857	22.556	24.218	23.343		class 3	4.52136
TGME49_215130	adaptor-related protein complex 3, sigma 2 subunit	22.88	21.52	24.474	23.007	21.842	23.455		class 3	4.51602
TGME49_263400	hypothetical protein	22.866	22.377	24.143	24.194	21.681	25.099		class 3	4.51513
TGME49_232500	hypothetical protein	22.864	20.583	24.732	22.206	22.302	24.718		class 3	4.51501
TGME49_218220	cell-cycle-associated protein kinase CDK, putative	22.859	22.792	22.754	22.745	24.298	22.175		class 3	4.51469
TGME49_220930	hypothetical protein	22.859	24.461	23.921	23.251	24.872	24.832		class 3	4.51469
TGME49_213920	hypothetical protein	22.847	21.291	22.866	22.189	21.954	23.071		class 3	4.51393
TGME49_313160	hypothetical protein	22.829	21.141	19.987	23.989	22.187	22.857		class 3	4.5128
TGME49_257540	hypothetical protein	22.827	24.788	27.343	24.38	23.127	24.963		class 3	4.51267
TGME49_294990	hypothetical protein	22.822	15.838	17.569	21.786	18.011	17.005		class 3	4.51235
TGME49_235130	transmembrane protein	22.813	22.622	25.489	22.728	22.865	24.624		class 3	4.51178
TGME49_457850	18S ribosomal RNA	22.806	23.632	34.725	16.045	34.433	59.446		class 3	4.51134
TGME49_287470	hypothetical protein	22.805	23.531	22.853	24.277	25.402	20.701		class 3	4.51128
TGME49_307760	Tubulin-tyrosine ligase family protein	22.8	21.597	25.316	24.894	23.391	23.271		class 3	4.51096
TGME49_267730	hypothetical protein	22.796	21.853	21.424	21.982	22.253	19.837		class 3	4.51071
TGME49_258140	hypothetical protein	22.77	18.554	22.885	19.16	22.589	17.992		class 3	4.50906
TGME49_267720	transporter, cation channel family protein	22.756	20.141	22.443	20.926	22.041	21.59		class 3	4.50818
TGME49_461460	18S ribosomal RNA	22.723	20.78	29.905	17.864	34.437	53.414		class 3	4.50608
TGME49_247300	hypothetical protein	22.718	19.817	20.586	21.375	20.865	19.146		class 3	4.50576
TGME49_258680	TATA-box binding protein TBP2	22.701	20.675	20.567	21.514	22.404	20.58		class 3	4.50468
TGME49_297940	single-strand binding protein	22.677	20.693	22.881	22.835	19.426	20.701		class 3	4.50316
TGME49_294050	hypothetical protein	22.645	22.41	22.411	22.796	24.578	22.665		class 3	4.50112
TGME49_208800	mediator complex subunit MED18	22.627	24.605	26.622	23.978	24.045	24.741		class 3	4.49997
TGME49_313540	hypothetical protein	22.608	22.753	22.275	23.565	25.472	22.057		class 3	4.49876
TGME49_213900	regulator of chromosome condensation RCC1	22.602	21.636	23.346	20.866	21.604	20.557		class 3	4.49838
TGME49_237220	DNA replication licensing factor Mcm7, putative	22.598	20.737	24.602	23.008	22.244	22.763		class 3	4.49812
TGME49_250330	hypothetical protein	22.594	20.978	24.896	24.093	23.043	22.956		class 3	4.49787
TGME49_250830	SAC3/GANP family protein	22.55	24.622	22.935	24.634	25.008	22.789		class 3	4.49506
TGME49_271178	hypothetical protein	22.538	25.728	25.779	21.94	25.712	25.622		class 3	4.49429
TGME49_262450	hypothetical protein	22.531	20.419	23.395	23.038	22.175	20.643		class 3	4.49384
TGME49_312050	small GTPase Rab2, putative	22.504	22.313	23.325	23.078	22.035	23.634		class 3	4.49211
TGME49_246330	CRAL/TRIO domain-containing protein	22.494	21.909	22.444	21.681	23.318	24.045		class 3	4.49147
TGME49_315660	hypothetical protein	22.483	23.886	20.253	34.968	30.561	29.682		class 3	4.49076
TGME49_458250	18S ribosomal RNA	22.473	22.313	31.518	18.043	37.379	59.305		class 3	4.49012
TGME49_246450	hypothetical protein	22.456	22.18	21.914	22.975	20.53	22.263		class 3	4.48903
TGME49_209900	hypothetical protein	22.45	22.1	25.561	23.349	21.767	27.15		class 3	4.48864
TGME49_314700	hypothetical protein	22.444	20.608	18.878	21.073	21.957	17.589		class 3	4.48826
TGME49_315130	L-isoaspartyl protein carboxyl methyltransferase family protein	22.439	24.132	25.845	29.081	25.296	26.434		class 3	4.48794
TGME49_313290	MORN repeat-containing protein	22.431	24.24	21.357	20.468	22.563	19.527		class 3	4.48742
TGME49_225310	ARF1-directed GTPase-activating protein, putative	22.43	23.188	24.912	21.605	23.822	24.576		class 3	4.48736
TGME49_258170	hypothetical protein	22.426	19.431	21.046	20.722	19.198	22.171		class 3	4.4871
TGME49_270700	hypothetical protein	22.417	20.227	19.799	22.351	18.309	18.655		class 3	4.48652
TGME49_215400	RNA recognition motif-containing protein	22.383	21.596	18.447	21.758	20.397	21.412		class 3	4.48433
TGME49_223140	tRNA binding domain-containing protein	22.38	25.728	22.422	22.707	23.798	23.722		class 3	4.48414
TGME49_286500	hypothetical protein	22.358	20.837	24.13	22.933	22.058	23.919		class 3	4.48272
TGME49_212850	hypothetical protein	22.342	22.872	20.788	24.454	26.435	21.085		class 3	4.48169
TGME49_253400	hypothetical protein	22.302	22.656	22.745	20.701	21.634	22.712		class 3	4.4791
TGME49_205680	hypothetical protein	22.301	19.334	21.72	19.72	19.04	18.754		class 3	4.47904
TGME49_228200	vacuolar (h+)-atpase g subunit protein	22.285	22.041	22.636	21.742	22.195	22.978		class 3	4.478
TGME49_223960	ubiquitin interaction motif family protein	22.277	24.834	23.968	24.227	24.869	23.789		class 3	4.47748
TGME49_458850	18S ribosomal RNA	22.277	24.876	40.847	17.114	41.94	73.482		class 3	4.47748
TGME49_249870	hypothetical protein	22.265	24.017	24.349	23.878	22.691	24.153		class 3	4.47671
TGME49_312240	hypothetical protein	22.25	30.307	19.561	20.558	22.841	17.64		class 3	4.47573
TGME49_225200	hypothetical protein	22.243	22.038	22.303	21.003	22.315	21.618		class 3	4.47528
TGME49_212260	Sjogren's syndrome/scleroderma autoantigen 1 (Autoantigen p27) protein	22.242	21.834	22.835	20.368	22.079	21.761		class 3	4.47521
TGME49_242680	ribosomal protein RPL24e	22.232	26.711	22.02	24.836	22.546	22.48		class 3	4.47457
TGME49_295420	hypothetical protein	22.215	21.337	22.795	22.017	21.015	21.987		class 3	4.47346
TGME49_253170	zinc carboxypeptidase, putative	22.197	20.925	20.24	22.488	19.728	19.522		class 3	4.47229
TGME49_458030	28S ribosomal RNA	22.187	32.364	39.277	20.764	37.931	73.489		class 3	4.47164
TGME49_256970	vacuolar ATP synthase subunit A, putative	22.181	23.062	22.686	22.572	21.94	21.281		class 3	4.47125
TGME49_258770	polypeptide n-acetylgalactosaminyltransferase 12, putative	22.148	21.258	23.294	22.715	24.212	24.108		class 3	4.4691
TGME49_311440	SAG-related sequence SRS50	22.139	20.775	25.123	20.89	23.976	24.884		class 3	4.46852
TGME49_293670	transcription elongation factor A TFIIS	22.111	21.554	20.642	22.546	21.323	20.839		class 3	4.46669
TGME49_459210	18S ribosomal RNA	22.106	25.718	39.124	18.848	43.641	72.31		class 3	4.46637
TGME49_319730	YOU2 family C2C2 zinc finger protein	22.053	21.934	16.961	22.818	21.359	19.323		class 3	4.4629
TGME49_249920	diphthine synthase, putative	22.033	20.523	22.578	23.203	21.366	23.973		class 3	4.46159
TGME49_212920	hypothetical protein	21.996	26.811	23.719	27.123	23.312	25.996		class 3	4.45917
TGME49_297150	MORN repeat-containing protein	21.991	25.288	21.522	21.092	23.095	21.458		class 3	4.45884
TGME49_278130	hypothetical protein	21.972	21.006	22.394	19.886	20.901	22.737		class 3	4.45759
TGME49_224205	ER lumen protein retaining receptor, putative	21.943	22.199	22.3	22.717	23.394	23.404		class 3	4.45569
TGME49_311090	ubiquitin carboxyl-terminal hydrolase	21.931	21.027	22.197	24.294	23.098	23.608		class 3	4.4549
TGME49_290860	amino acid transporter, putative	21.925	19.864	21.065	21.703	20.452	21.845		class 3	4.4545
TGME49_258690	5-aminolevulinic acid synthase domain-containing protein	21.923	22.028	21.243	20.382	22.068	19.911		class 3	4.45437
TGME49_292200	RNA recognition motif-containing protein	21.897	19.784	20.488	20.462	20.937	20.324		class 3	4.45266
TGME49_225810	BIR protein	21.883	21.155	21.091	22.568	22.388	22.986		class 3	4.45174
TGME49_203710	AP2 domain transcription factor AP2VIIa-4	21.87	21.052	25.337	22.077	22.831	23.33		class 3	4.45088
TGME49_460450	28S ribosomal RNA	21.868	29.98	38.651	18.078	34.945	72.793		class 3	4.45075
TGME49_226470	hypothetical protein	21.85	22.214	20.711	20.128	24.573	20.535		class 3	4.44956
TGME49_212780	hypothetical protein	21.842	19.559	23.415	21.073	21.249	21.946		class 3	4.44903
TGME49_248630	actin-related protein ARP1	21.838	20.244	21.57	21.947	20.777	22.134		class 3	4.44877
TGME49_225020	hypothetical protein	21.838	21.363	20.311	22.789	21.747	21.662		class 3	4.44877
TGME49_289050	FIKK kinase, putative	21.83	27.122	26.993	19.124	26.64	24.884		class 3	4.44824
TGME49_219700	DNA replication licensing factor MCM4, putative	21.828	20.555	21.819	21.353	21.709	20.511		class 3	4.44811
TGME49_264660	SAG-related sequence SRS44	21.825	14.492	22.179	20.027	15.948	17.908		class 3	4.44791
TGME49_281980	phosphatidate cytidylyltransferase	21.823	19.942	20.395	21.057	21.561	21.825		class 3	4.44778
TGME49_205730	hypothetical protein	21.809	23.409	22.62	23.358	22.539	22.685		class 3	4.44685
TGME49_297130	hypothetical protein	21.799	21.115	21.759	22.4	21.064	21.653		class 3	4.44619
TGME49_246570	hypothetical protein	21.797	20.473	21.141	23.292	19.43	20.745		class 3	4.44606
TGME49_457520	18S ribosomal RNA	21.795	22.291	35.386	21.357	39.467	62.69		class 3	4.44593
TGME49_222090	hypothetical protein	21.78	22.366	20.784	21.621	21.354	20.028		class 3	4.44493
TGME49_275770	hypothetical protein	21.775	21.428	20.496	23.301	24.82	22.375		class 3	4.4446
TGME49_253360	hypothetical protein	21.755	20.495	22.848	21.662	22.29	23.946		class 3	4.44328
TGME49_218760	SNAP protein (soluble N-ethylmaleimide-sensitive factor Attachment Protein), putative	21.746	22.329	23.748	22.454	24.718	23.641		class 3	4.44268
TGME49_245710	phosphatidylinositol-4-phosphate 5-kinase, putative	21.734	19.816	23.146	21.849	22.654	22.356		class 3	4.44188
TGME49_314710	carrier superfamily protein	21.706	19.566	24.056	22.527	20.088	24.368		class 3	4.44002
TGME49_233220	hypothetical protein	21.701	19.461	19.085	20.163	20.808	19.763		class 3	4.43969
TGME49_289980	HAD hydrolase, family IIA protein	21.682	22.541	23.889	21.544	21.678	24.887		class 3	4.43843
TGME49_230060	acetyltransferase, GNAT family protein	21.67	21.776	22.506	19.688	20.404	24.284		class 3	4.43763
TGME49_462920	large subunit ribosomal RNA	21.645	23.598	18.196	25.936	17.757	19.004		class 3	4.43596
TGME49_268280	'chromo' (CHRromatin Organization MOdifier) domain-containing protein	21.641	19.848	22.04	21.581	20.765	22.235		class 3	4.4357
TGME49_270805	hypothetical protein	21.64	24.323	24.855	22.235	26.725	21.163		class 3	4.43563
TGME49_310400	glycosyl transferase family 8 protein	21.637	20.159	20.664	22.267	21.451	18.724		class 3	4.43543
TGME49_247780	hypothetical protein	21.635	20.291	21.112	22.469	21.289	21.092		class 3	4.4353
TGME49_231100	hypothetical protein	21.632	19.886	22.518	21.579	21.04	23.503		class 3	4.4351
TGME49_282170	hypothetical protein	21.62	22.275	20.354	21.635	24.951	19.142		class 3	4.43429
TGME49_459990	18S ribosomal RNA	21.62	30.123	33.541	17.749	43.287	64.392		class 3	4.43429
TGME49_460910	28S ribosomal RNA	21.589	31.414	35.822	19.926	33.378	69.544		class 3	4.43222
TGME49_458930	28S ribosomal RNA	21.577	30.661	40.87	18.342	37.975	74.039		class 3	4.43142
TGME49_291810	thioredoxin domain-containing protein	21.576	21.608	23.914	21.685	20.94	22.075		class 3	4.43136
TGME49_222710	IMP-specific 5'-nucleotidase 1, putative	21.557	19.958	23.319	22.367	20.123	23.23		class 3	4.43008
TGME49_319695	hypothetical protein	21.553	24.821	23.549	25.062	23.606	21.192		class 3	4.42982
TGME49_261210	26s proteasome subunit p55, putative	21.519	20.793	20.773	20.969	21.074	21.455		class 3	4.42754
TGME49_461230	28S ribosomal RNA	21.514	29.226	40.579	19.375	34.344	70.04		class 3	4.4272
TGME49_458840	18S ribosomal RNA	21.51	20.934	28.172	14.048	36.681	58.009		class 3	4.42694
TGME49_269180	MIF4G domain-containing protein	21.509	20.56	18.747	21.213	21.945	19.62		class 3	4.42687
TGME49_215170	serine/threonine-protein phosphatase 2A catalytic subunit beta isoform, putative	21.5	20.087	24.158	21.374	19.606	22.729		class 3	4.42626
TGME49_240450	Maf family protein	21.499	20.343	19.132	20.868	20.856	16.95		class 3	4.4262
TGME49_259570	CMP/dCMP deaminase, zinc-binding, putative	21.497	27.119	26.739	24.19	25.392	30.486		class 3	4.42606
TGME49_251880	tRNA synthetases class I family protein	21.478	21.247	19.694	22.436	20.837	19.549		class 3	4.42479
TGME49_320070	CDK-activating kinase assembly factor MAT1 protein	21.439	20.914	21.786	20.768	20.66	20.156		class 3	4.42217
TGME49_291300	RER1 protein, putative	21.425	18.733	19.48	19.347	20.153	19.446		class 3	4.42122
TGME49_230510	hypothetical protein	21.404	22.091	22.358	23.256	20.989	22.031		class 3	4.41981
TGME49_214480	replication factor a protein 3 protein	21.372	19.873	19.301	21.007	19.973	21.723		class 3	4.41765
TGME49_460160	28S ribosomal RNA	21.364	32.615	44.888	22.188	40.365	86.837		class 3	4.41711
TGME49_246620	G10 family protein	21.362	23.184	20.634	20.931	22.495	19.873		class 3	4.41697
TGME49_214140	hypothetical protein	21.358	20.493	21.31	20.314	21.816	20.058		class 3	4.4167
TGME49_292110	formate/nitrite transporter protein	21.339	18.459	20.858	19.734	17.869	18.25		class 3	4.41542
TGME49_305860	calcium-dependent protein kinase CDPK3	21.338	21.227	17.66	21.677	22.111	16.141		class 3	4.41535
TGME49_207590	protein phosphatase 2C domain-containing protein	21.308	20.49	20.997	18.195	19.304	19.556		class 3	4.41332
TGME49_314100	tetratricopeptide repeat-containing protein	21.308	22.797	20.491	22.518	22.666	20.216		class 3	4.41332
TGME49_254390	CRAL/TRIO domain-containing protein	21.303	20.613	19.34	19.732	20.766	19.003		class 3	4.41298
TGME49_209160	myristoyl CoA:protein N-myristoyltransferase	21.293	21.379	20.923	21.647	23.626	21.067		class 3	4.41231
TGME49_216590	HEAT repeat-containing protein	21.272	20.516	21.482	21.057	21.014	19.967		class 3	4.41088
TGME49_306520	tRNA pseudouridine synthase B, putative	21.263	21.117	19.647	20.965	21.272	20.28		class 3	4.41027
TGME49_204270	hypothetical protein	21.223	22.003	21.893	25.157	24.3	20.827		class 3	4.40756
TGME49_292330	hypothetical protein	21.214	18.536	20.895	20.428	19.974	19.749		class 3	4.40694
TGME49_219550	dihydrolipoyllysine-residue succinyltransferase component of oxoglutarate dehydrogenase	21.177	21.527	21.095	21.282	20.493	21.761		class 3	4.40443
TGME49_267300	hypothetical protein	21.158	22.183	23.472	22.48	22.861	23.769		class 3	4.40313
TGME49_228210	26S proteasome regulatory subunit	21.157	23.149	24.36	22.587	23.651	23.284		class 3	4.40306
TGME49_231215	hypothetical protein	21.146	20.803	19.477	19.131	21.252	18.388		class 3	4.40231
TGME49_281520	zinc finger, C3HC4 type (RING finger) domain-containing protein	21.144	20.633	20.681	20.526	21.87	20.401		class 3	4.40218
TGME49_214180	ENTH domain-containing protein	21.143	20.528	19.577	20.199	21.471	19.887		class 3	4.40211
TGME49_232560	hypothetical protein	21.134	18.12	22.898	20.834	18.73	21.506		class 3	4.40149
TGME49_315160	hypothetical protein	21.132	20.138	19.995	20.152	22.728	20.582		class 3	4.40136
TGME49_264060	PCI domain-containing protein	21.115	22.351	19.883	22.402	22.87	20.964		class 3	4.4002
TGME49_305120	transporter, solute:sodium symporter (SSS) family protein	21.087	17.904	22.805	20.579	19.508	20.753		class 3	4.39828
TGME49_236070	pyrroline-5-carboxylate reductase	21.081	23.446	19.983	21.622	21.003	20.088		class 3	4.39787
TGME49_323320	hypothetical protein	21.071	35.316	17.701	23.323	31.312	18.461		class 3	4.39719
TGME49_309220	GTPase activating protein for Arf protein	21.065	19.378	19.095	19.529	20.082	20.144		class 3	4.39678
TGME49_225350	hypothetical protein	21.055	20.8	21.882	24.805	22.158	20.534		class 3	4.39609
TGME49_244640	hypothetical protein	21.05	18.681	21.339	21.187	19.241	21.714		class 3	4.39575
TGME49_230450	bifunctional GMP synthase/glutamine amidotransferase protein	21.037	20.905	17.921	19.285	21.758	17.453		class 3	4.39486
TGME49_280400	hypothetical protein	21.032	4.351	5.073	20.22	4.781	5.04		class 3	4.39451
TGME49_268380	RNA recognition motif-containing protein	20.993	20.133	20.385	20.107	22.351	18.394		class 3	4.39184
TGME49_203170	OB-fold nucleic acid binding domain-containing protein	20.976	19.867	22.95	20.528	21.063	21.836		class 3	4.39067
TGME49_203400	hypothetical protein	20.958	19.997	19.835	23.749	21.337	23.873		class 3	4.38943
TGME49_263580	bromodomain-containing protein	20.952	18.651	18.129	20.226	21.455	20.024		class 3	4.38902
TGME49_306310	RecF/RecN/SMC N terminal domain-containing protein	20.942	24.533	19.011	22.744	22.431	20.524		class 3	4.38833
TGME49_286550	hypothetical protein	20.914	21.875	20.545	22.119	20.168	19.923		class 3	4.3864
TGME49_460140	28S ribosomal RNA	20.889	28.477	35.118	17.716	30.964	67.295		class 3	4.38467
TGME49_222290	LSM domain-containing protein	20.881	20.695	22.921	23.365	22.461	24.83		class 3	4.38412
[truncated: 6,906 more rows]
