# Supplementary material for: Modifications at K31 on the lateral surface of histone H4 contribute to genome structure and expression in apicomplexan parasites
Source: eLife journal article supplement (doi:10.7554/elife.29391), 2017-11-03
Supplement: supp [file elife-29391-supp-v2.zip › elife_poa_e29391_Figure_12_figure_supplement_2.pdf]

Pf3D7\_Chr 09:1,221,335-1,255,984

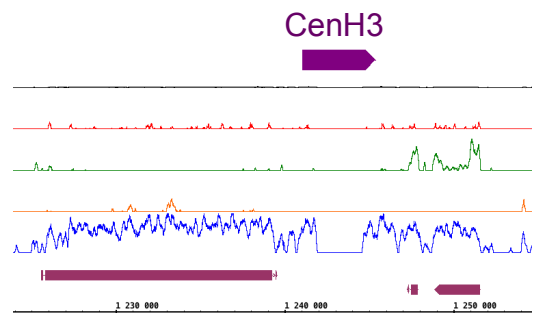

HP1  
H3K9me3  
H3K4me3  
H4K31ac  
H4K31me1  
genes

Pf3D7\_Chr 10:930,550-942,669

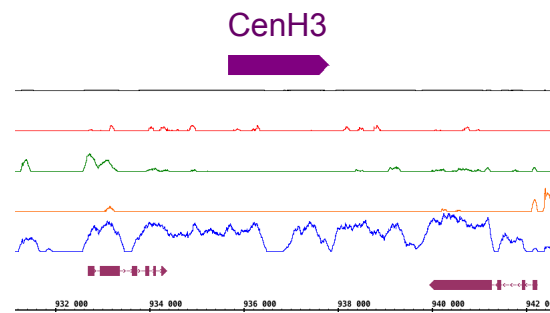

Pf3D7\_Chr 11:818,788-843,000

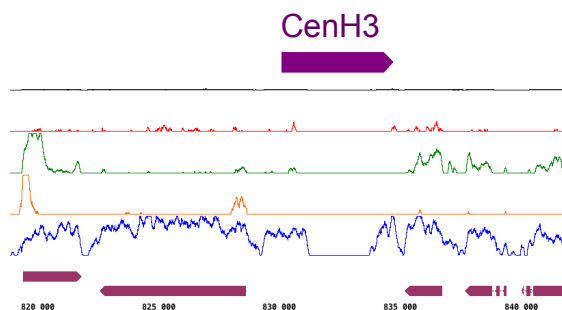

HP1  
H3K9me3  
H3K4me3  
H4K31ac  
H4K31me1  
genes

Pf3D7\_Chr 12:1,275,979-1,297,490

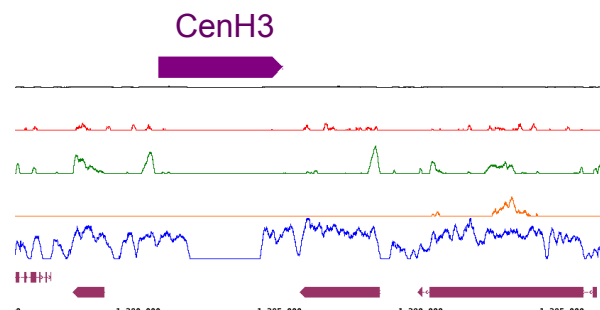

Pf3D7\_Chr 13:1,161,340-1,181,799

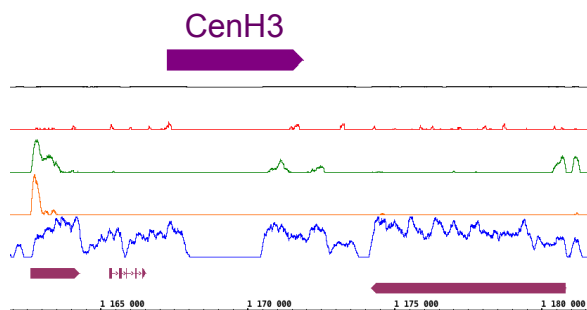

HP1  
H3K9me3  
H3K4me3  
H4K31ac  
H4K31me1  
genes

Pf3D7\_Chr 14:1,062,788-1,081,621

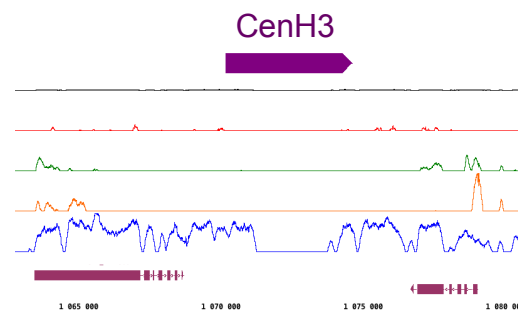

Figure 12 – figure supplement 2
