# Supplementary figures and images for: Modifications at K31 on the lateral surface of histone H4 contribute to genome structure and expression in apicomplexan parasites
Source: eLife journal article supplement (doi:10.7554/elife.29391), 2017-11-03

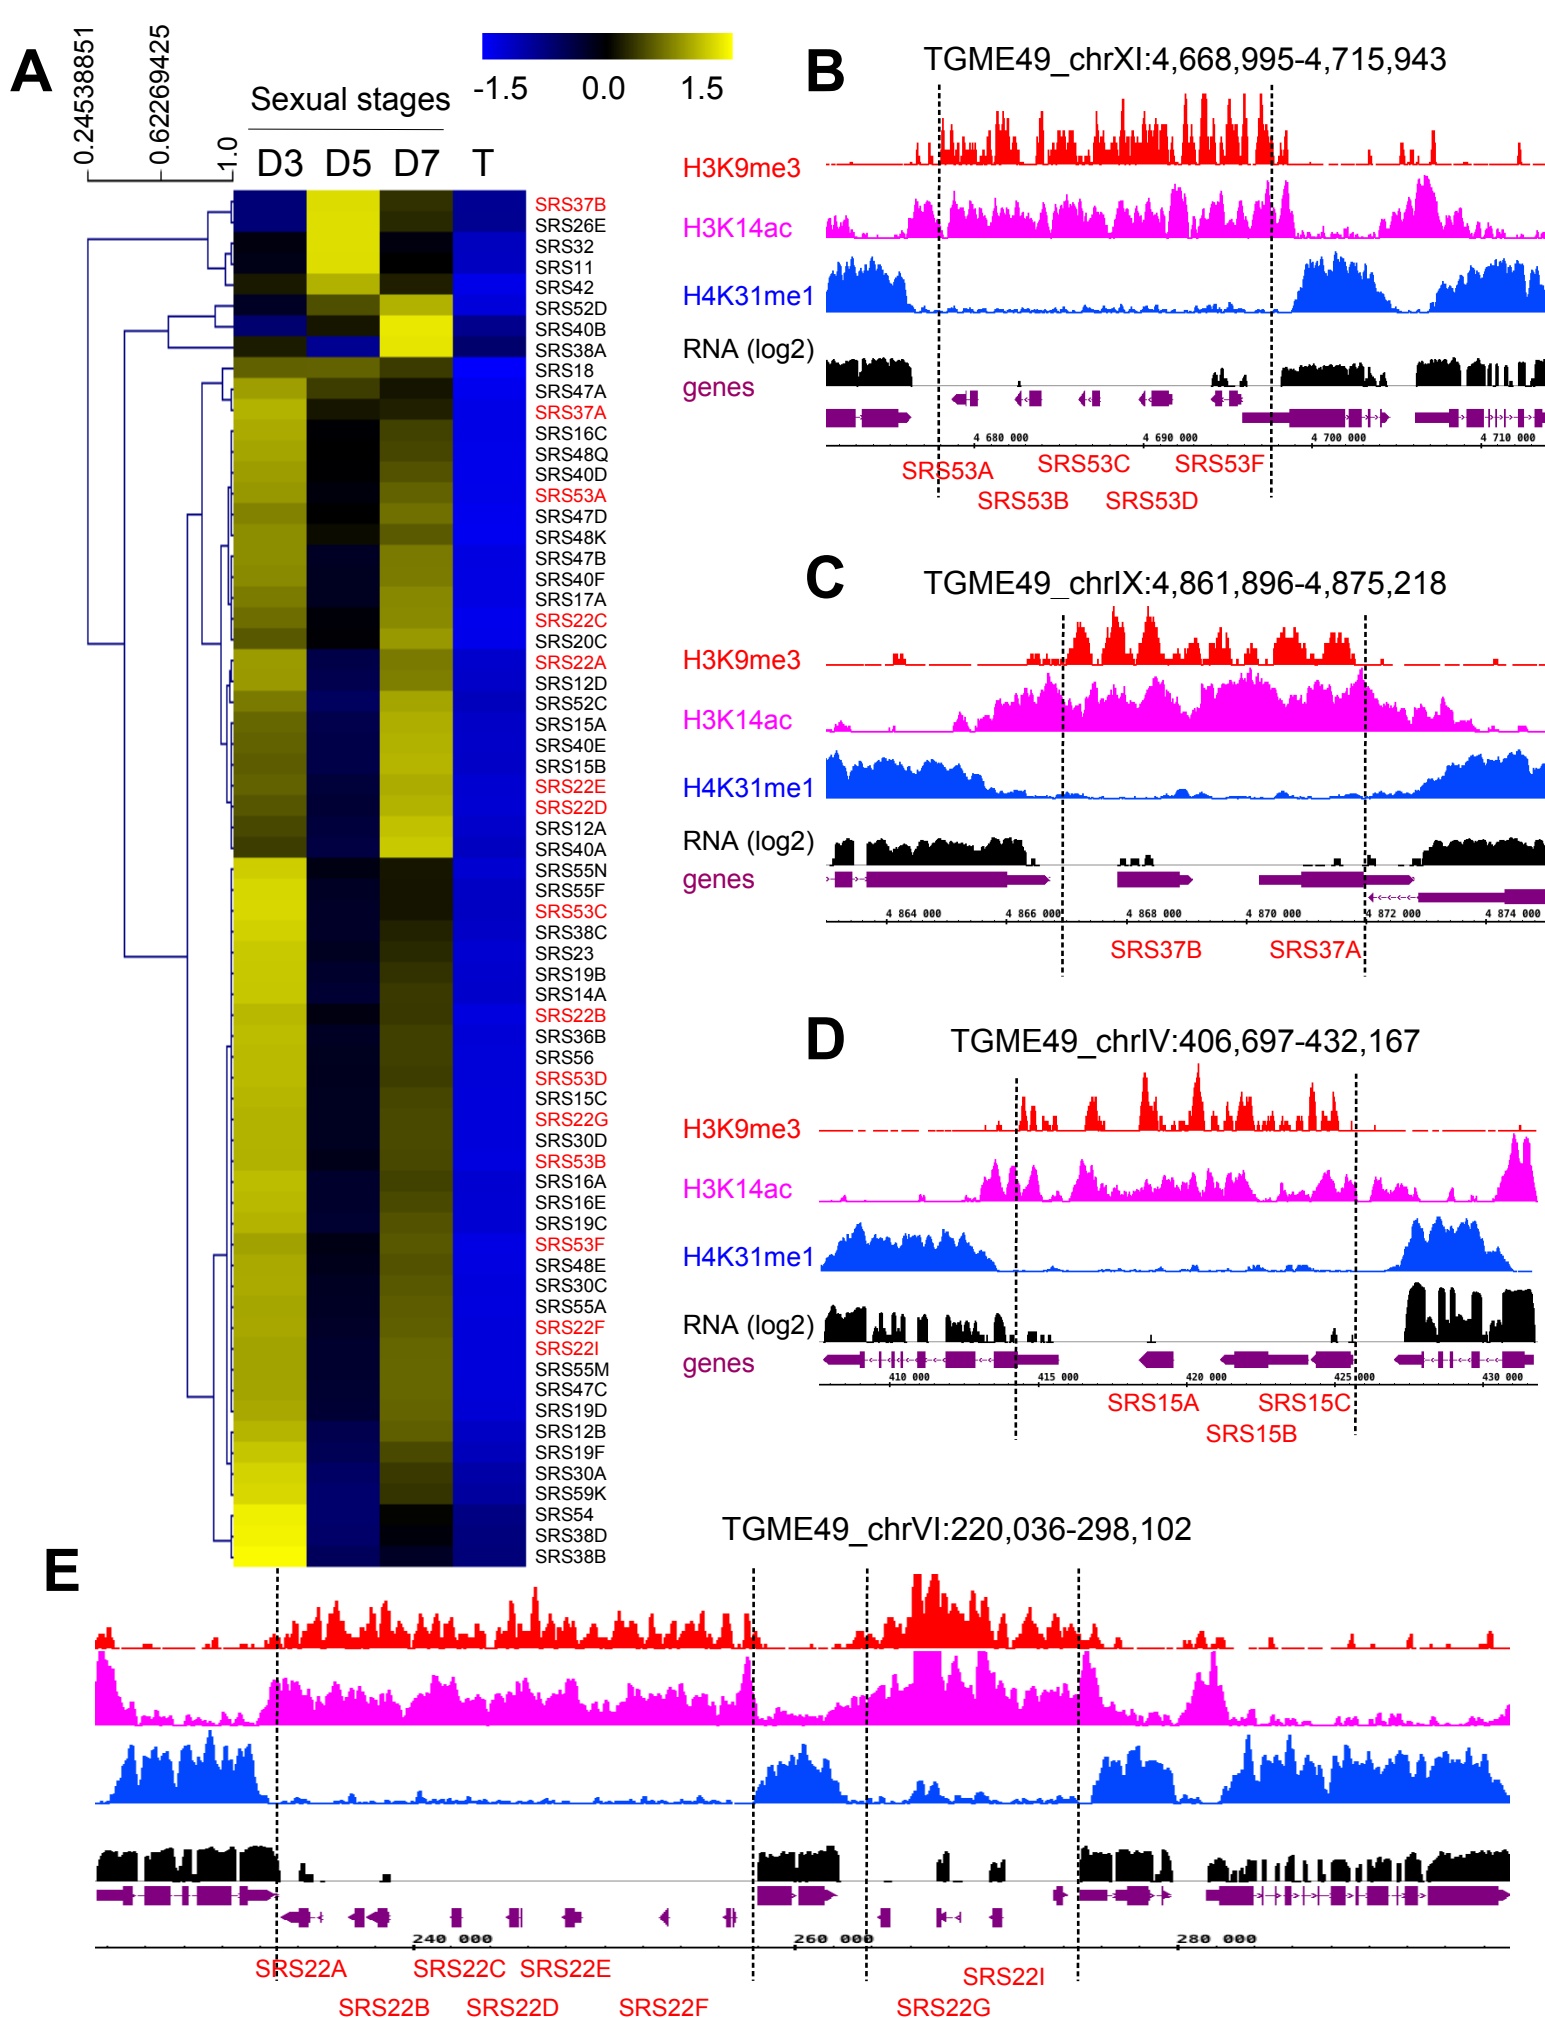

Figure 10 – figure supplement 3

Supplement: supp [file elife-29391-supp-v1.zip]

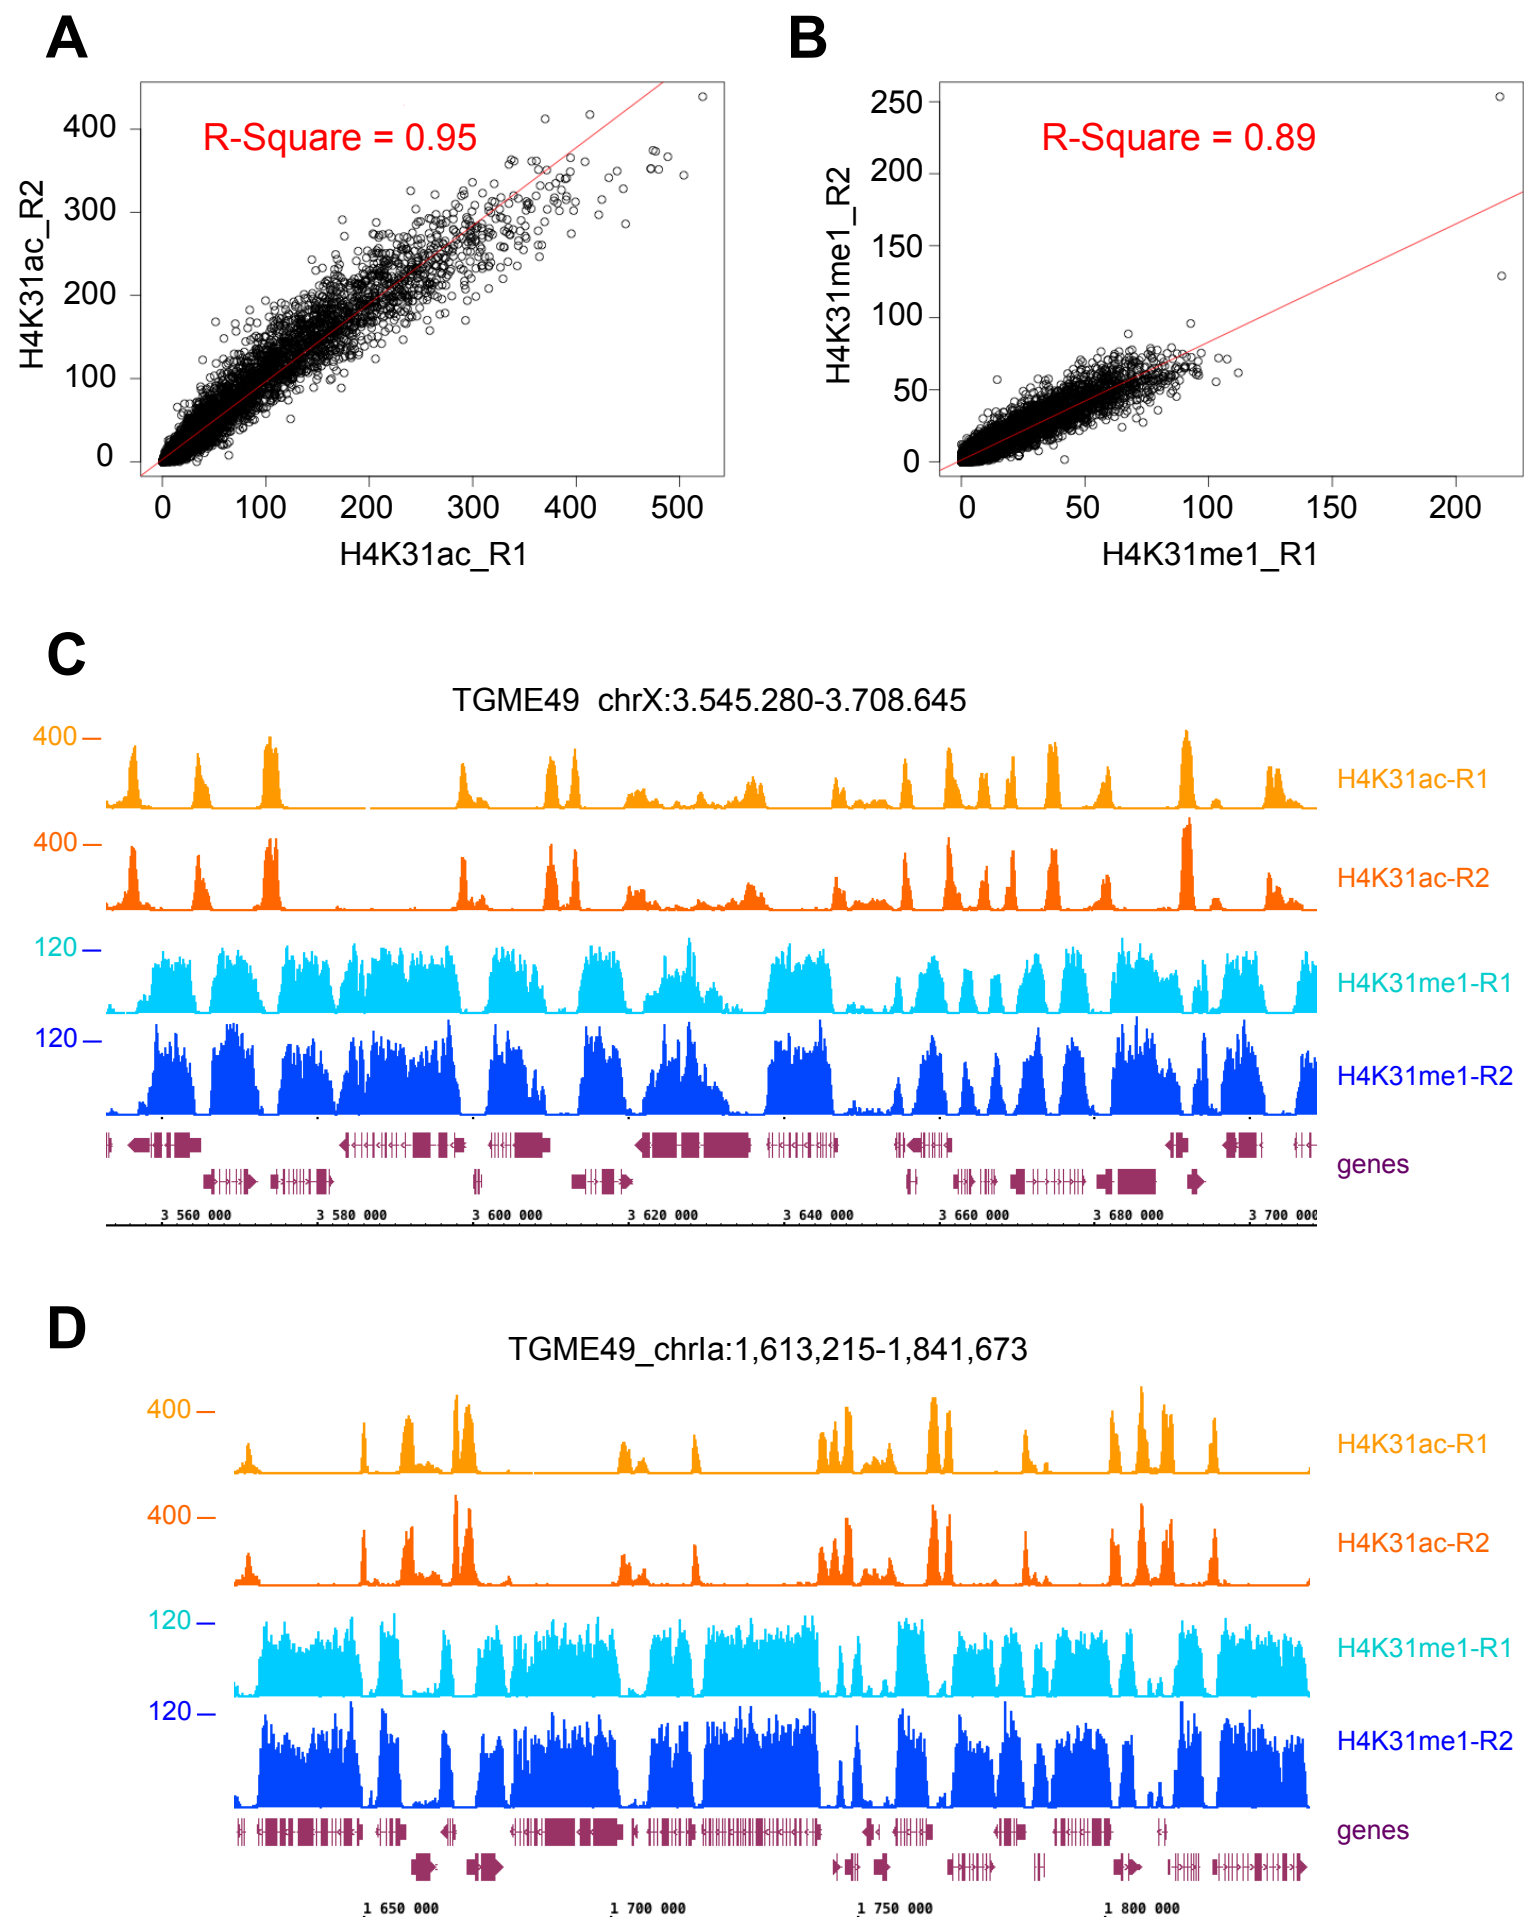

Figure 8 – figure supplement 1

Supplement: supp [file elife-29391-supp-v1.zip]

Pf3D7\_Chr 09:1,221,335-1,255,984

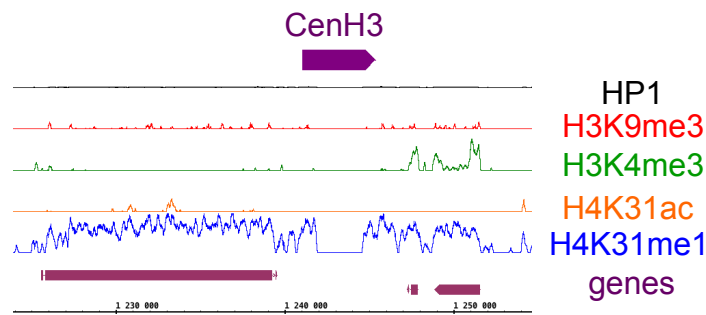

Pf3D7\_Chr 10:930,550-942,669

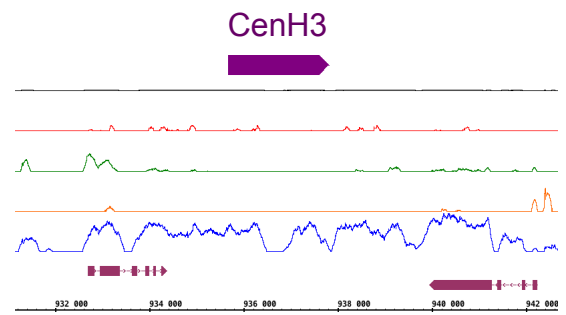

Pf3D7\_Chr 11:818,788-843,000

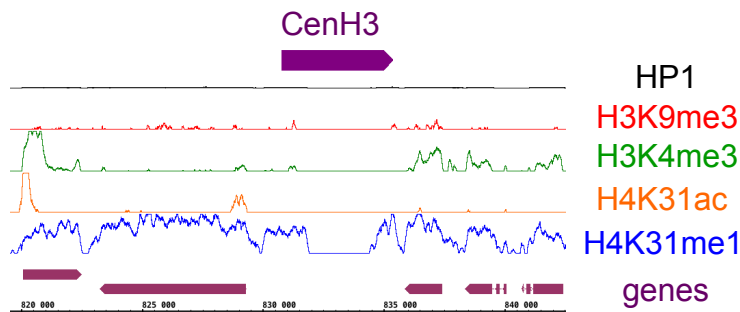

Pf3D7\_Chr 12:1,275,979-1,297,490

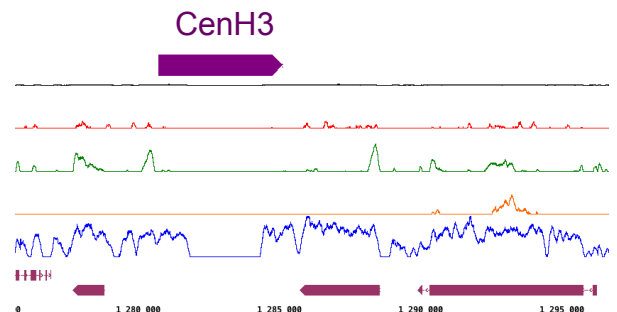

Pf3D7\_Chr 13:1,161,340-1,181,799

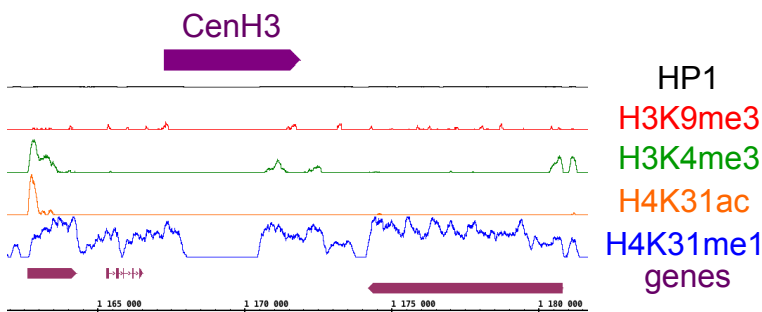

Pf3D7\_Chr 14:1,062,788-1,081,621

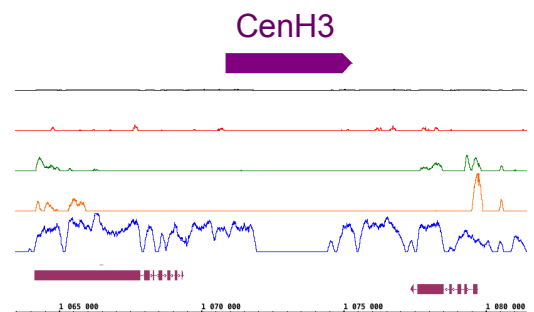

Figure 12 – figure supplement 2

Supplement: supp [file elife-29391-supp-v1.zip]

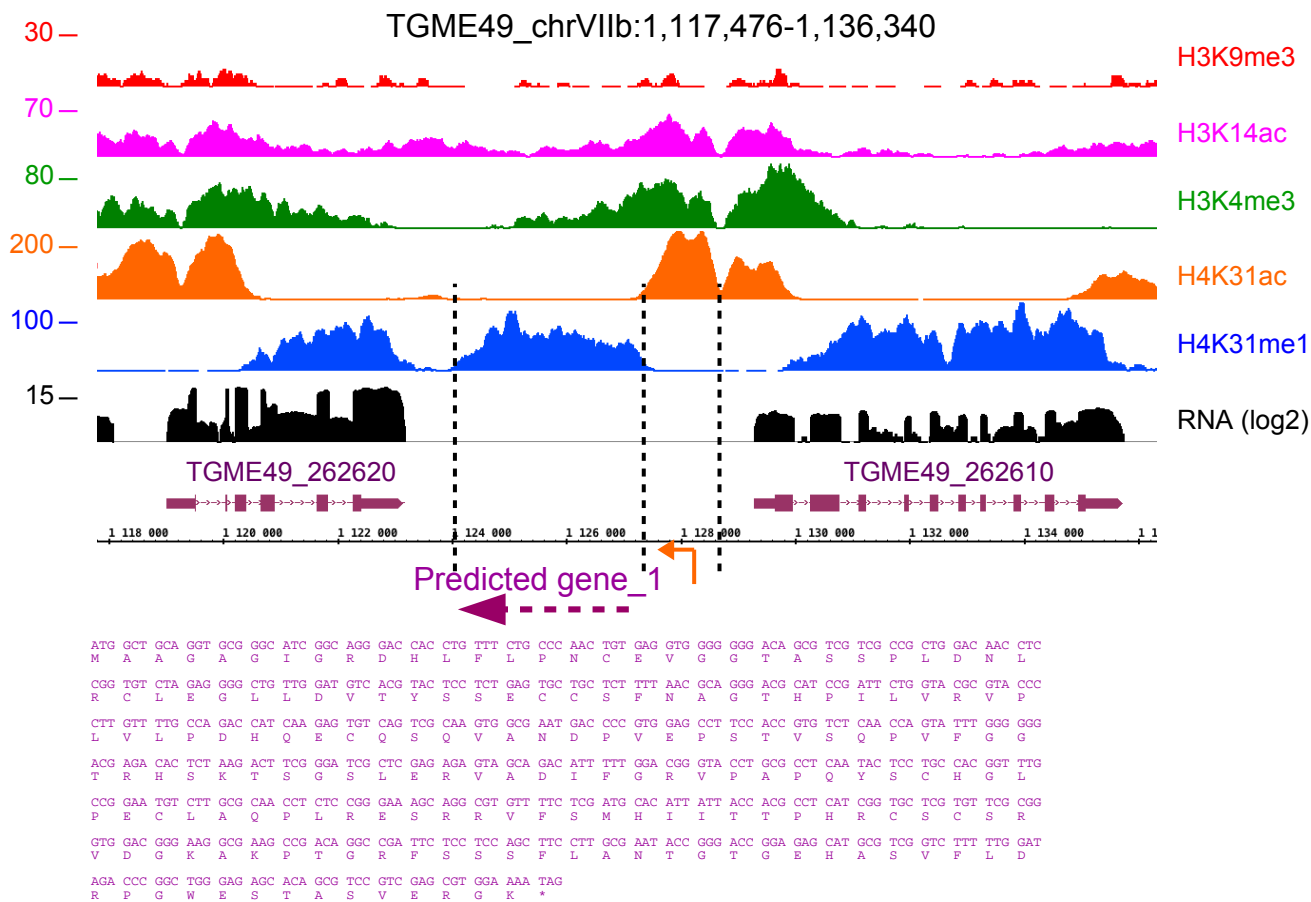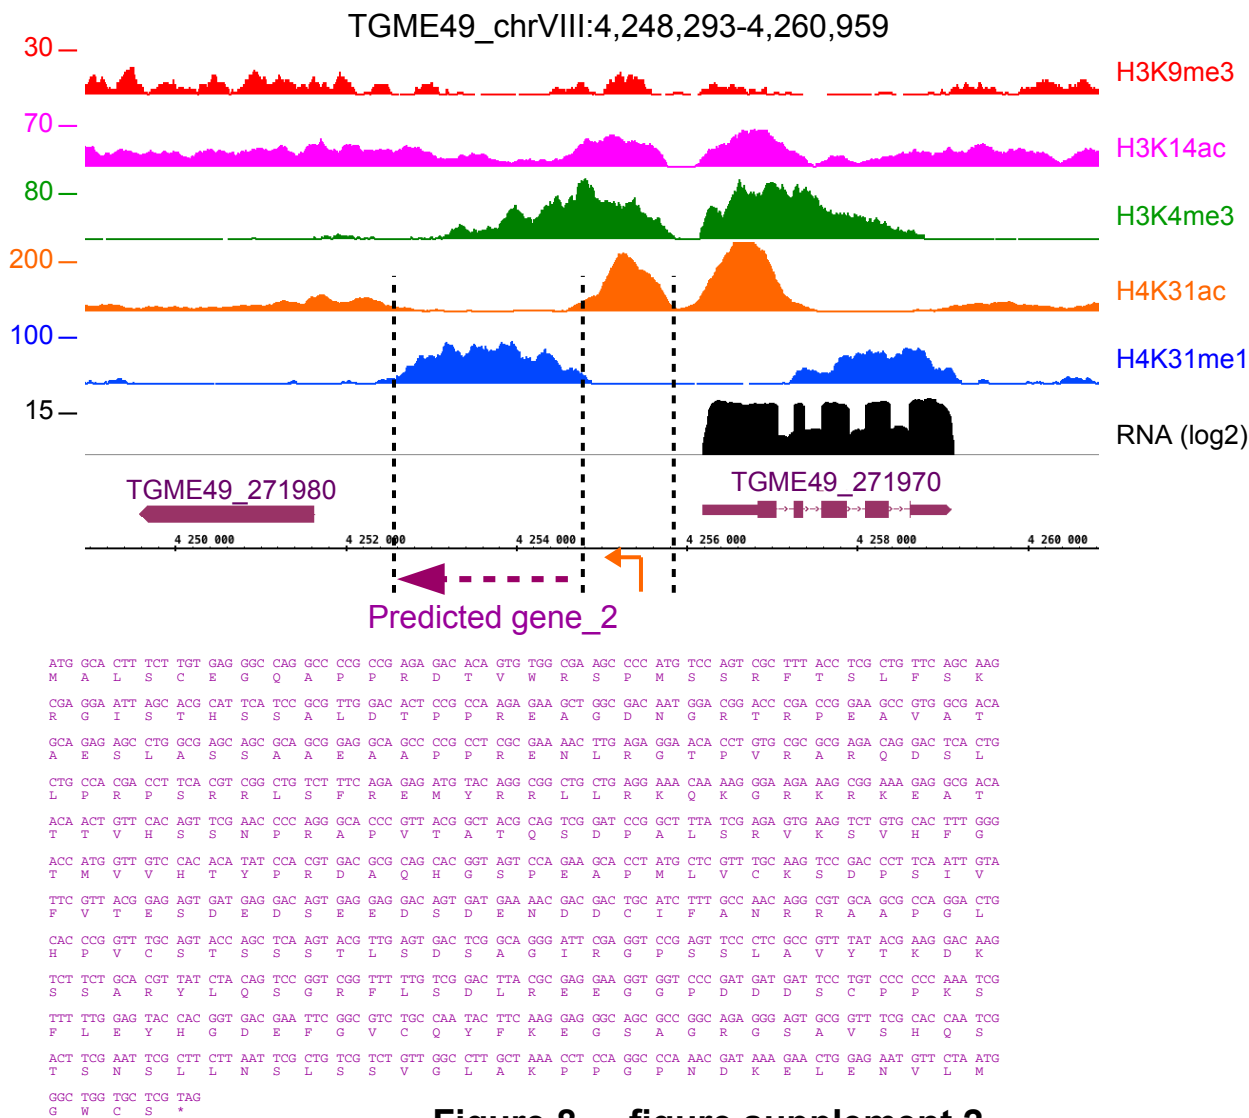

Figure 8 – figure supplement 2

Supplement: supp [file elife-29391-supp-v1.zip]

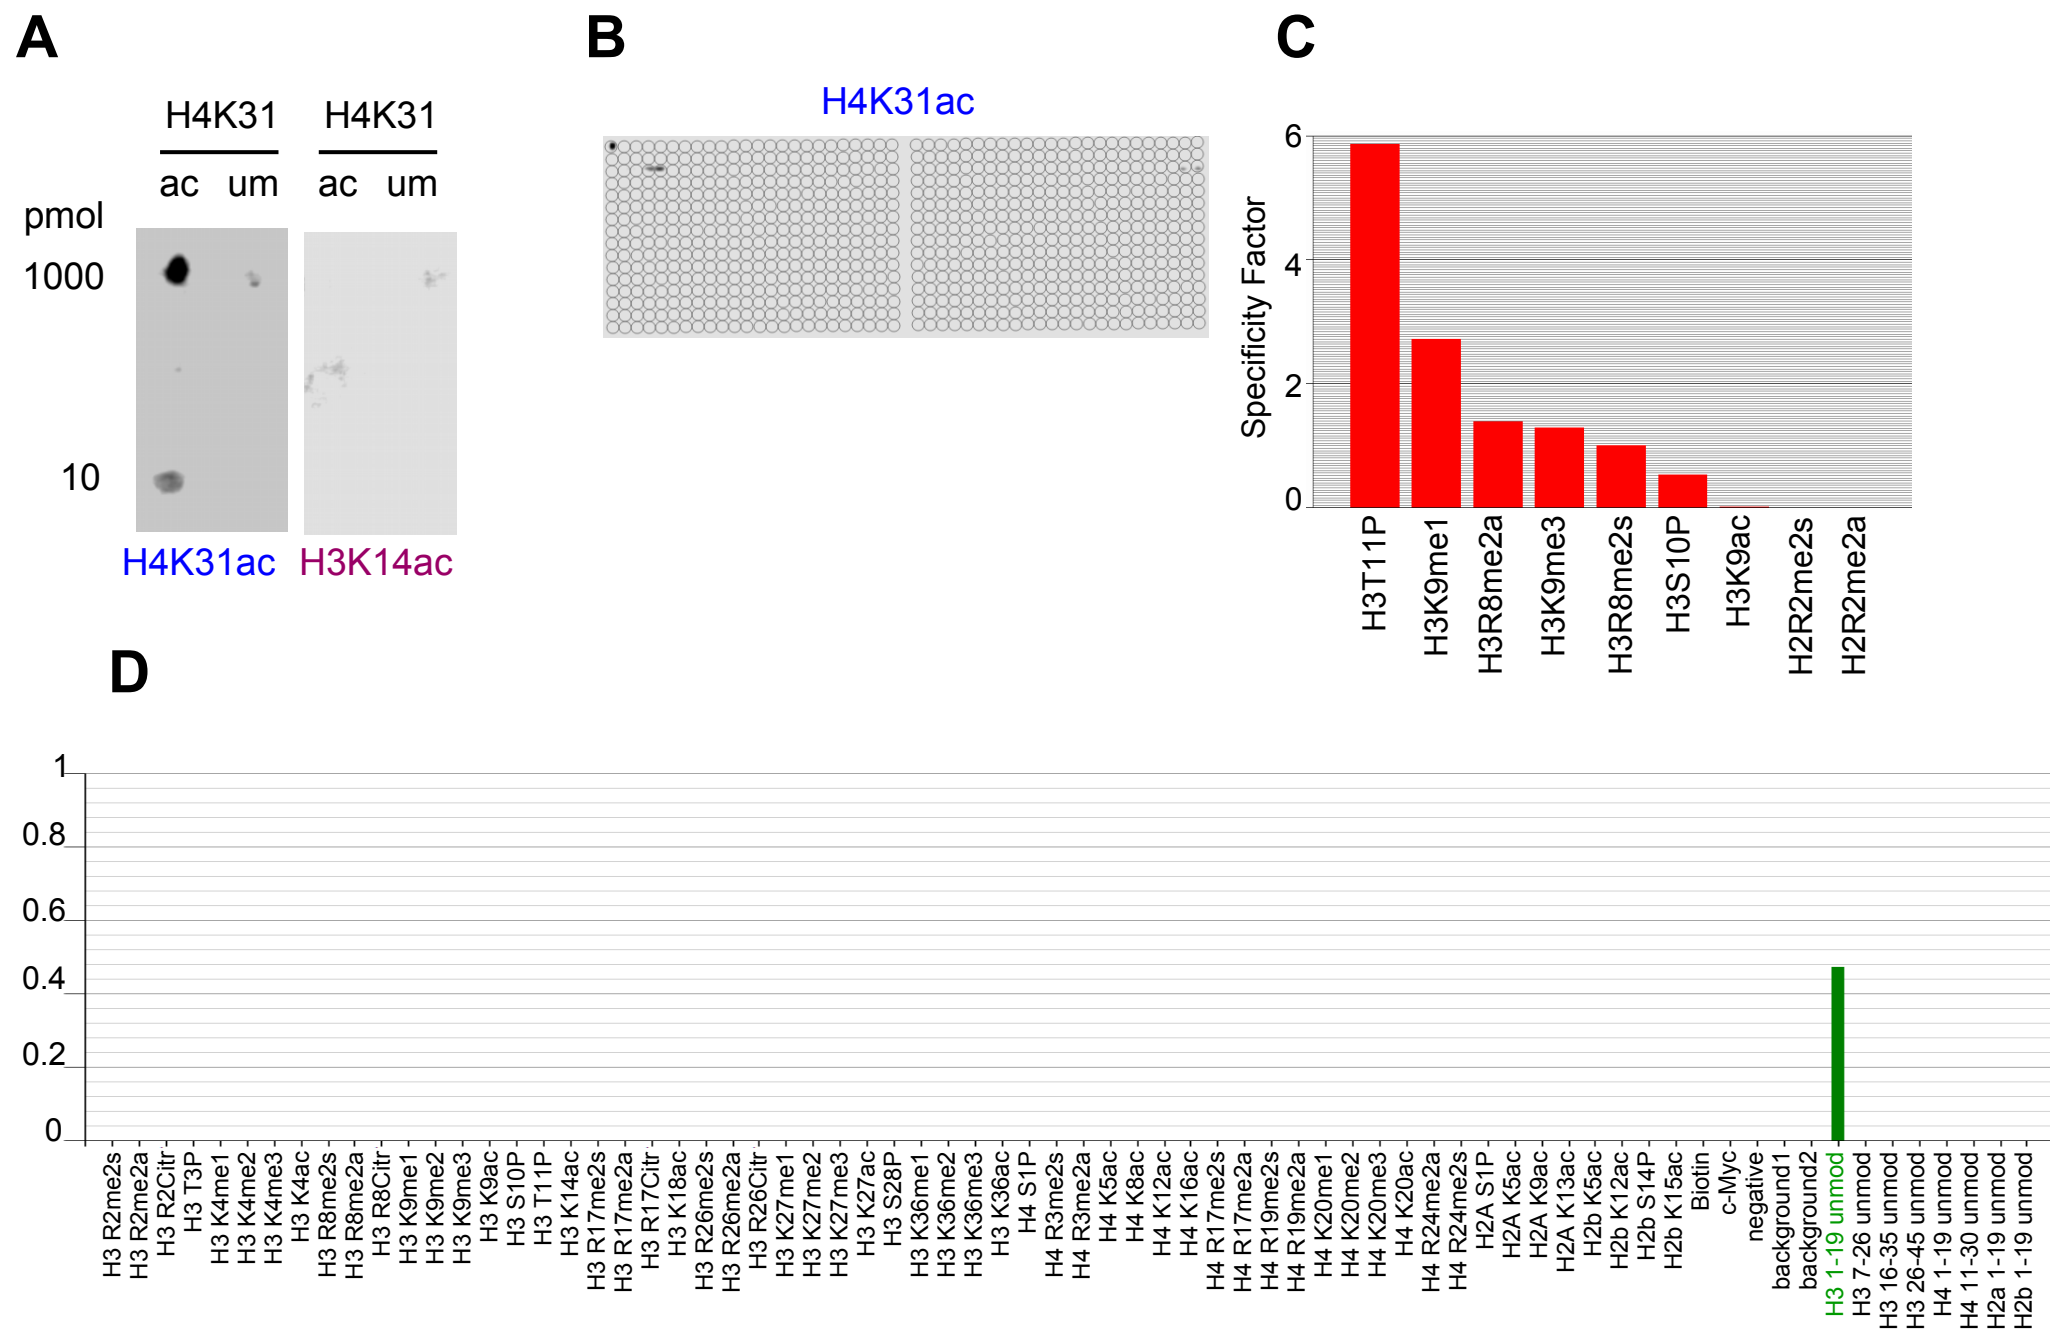

Figure 1 – figure supplement 1

Supplement: supp [file elife-29391-supp-v1.zip]

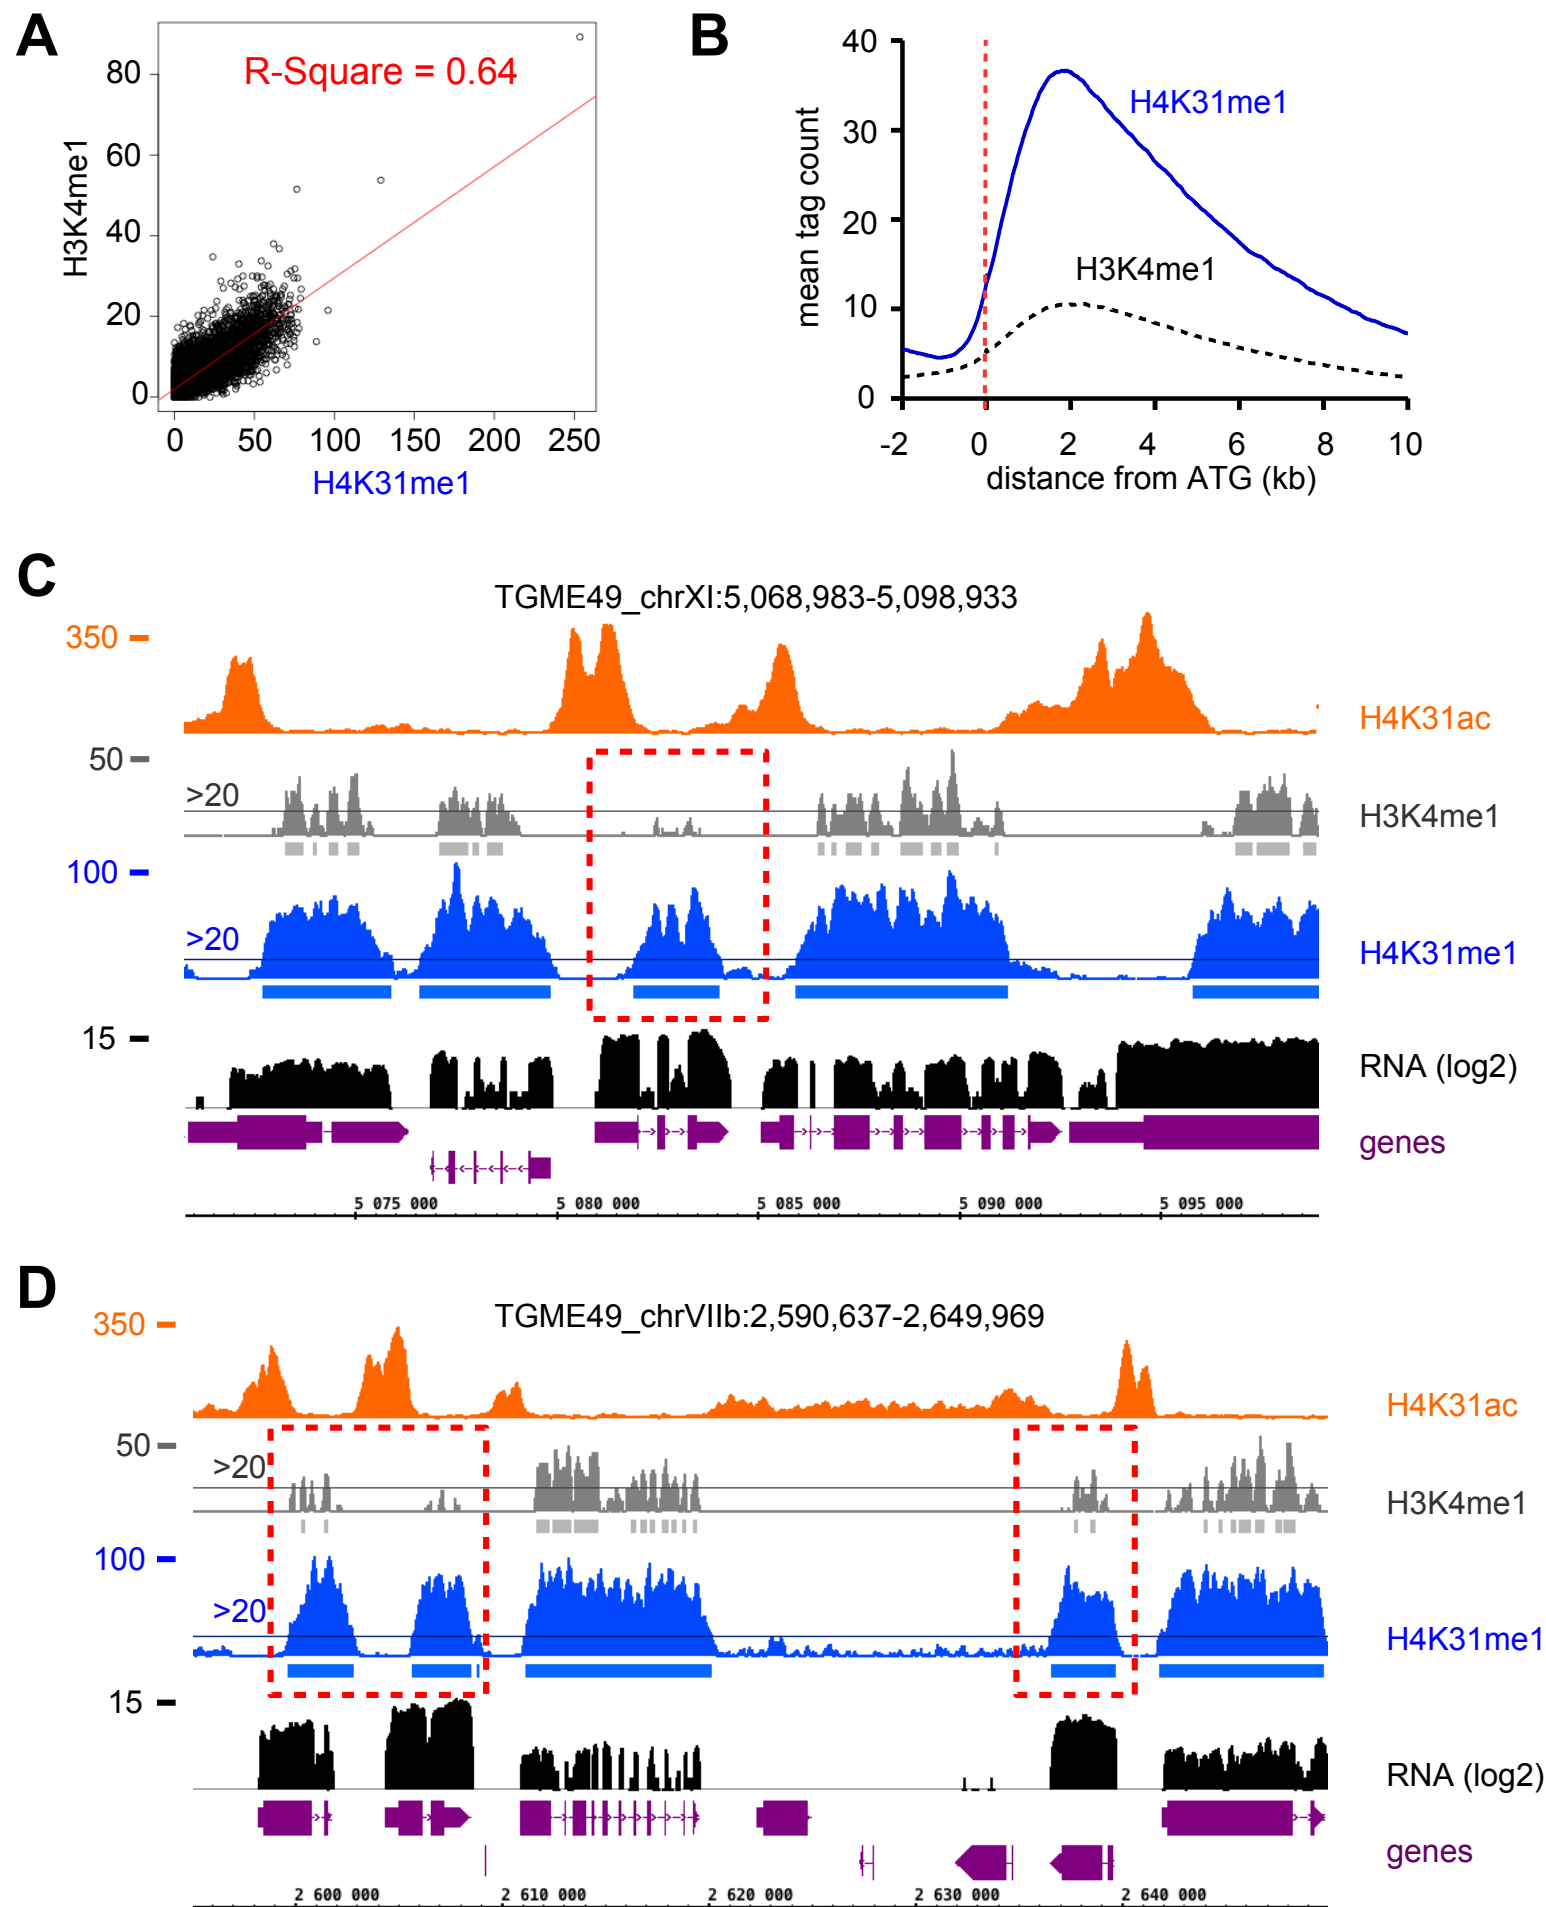

Figure 8 – figure supplement 3

Supplement: supp [file elife-29391-supp-v1.zip]

# H3K14ac (Millipore # 04-1044)

**A**

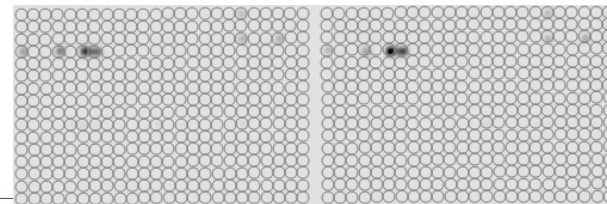

**B**

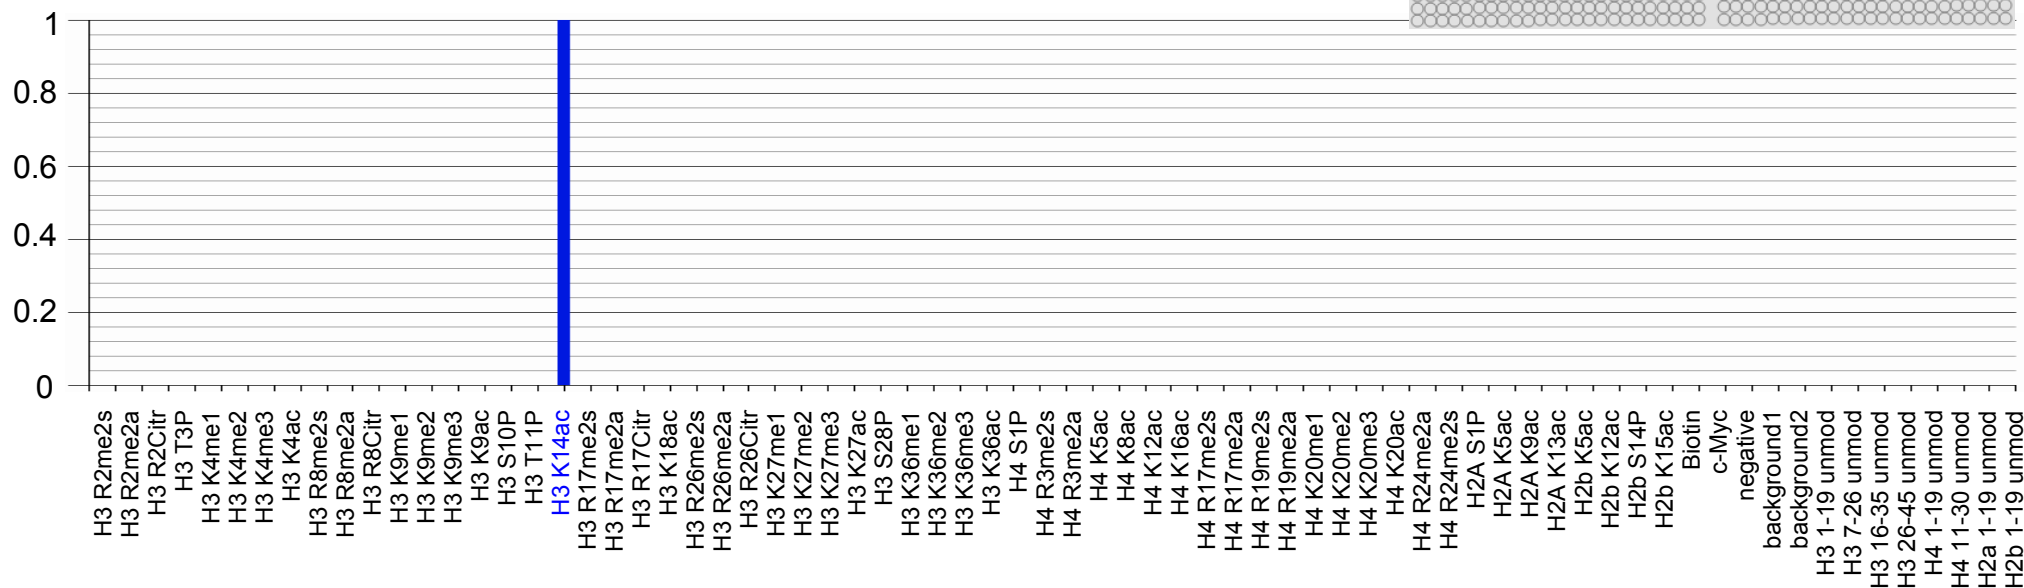

**C**

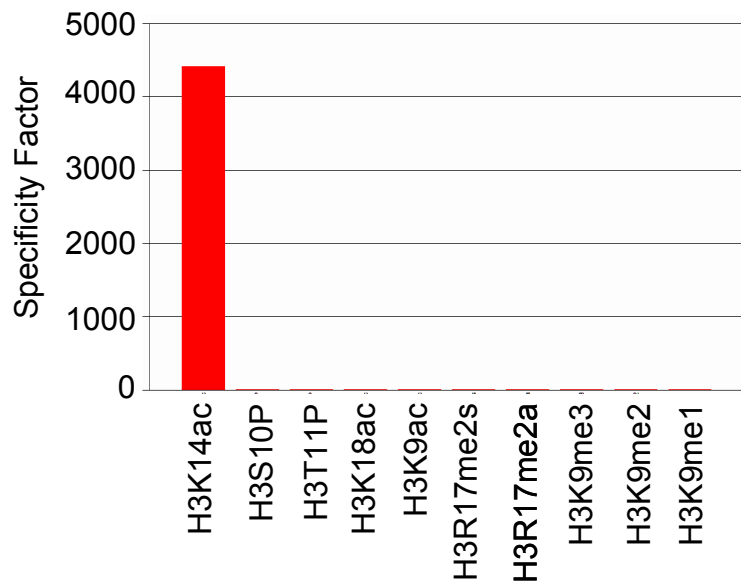

**D**

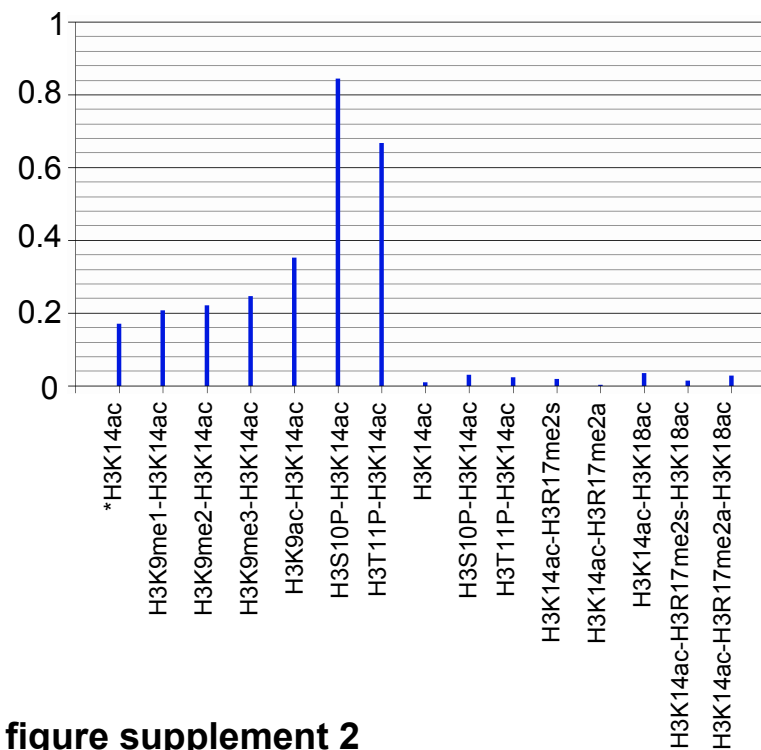

Figure 1 – figure supplement 2

Supplement: supp [file elife-29391-supp-v1.zip]

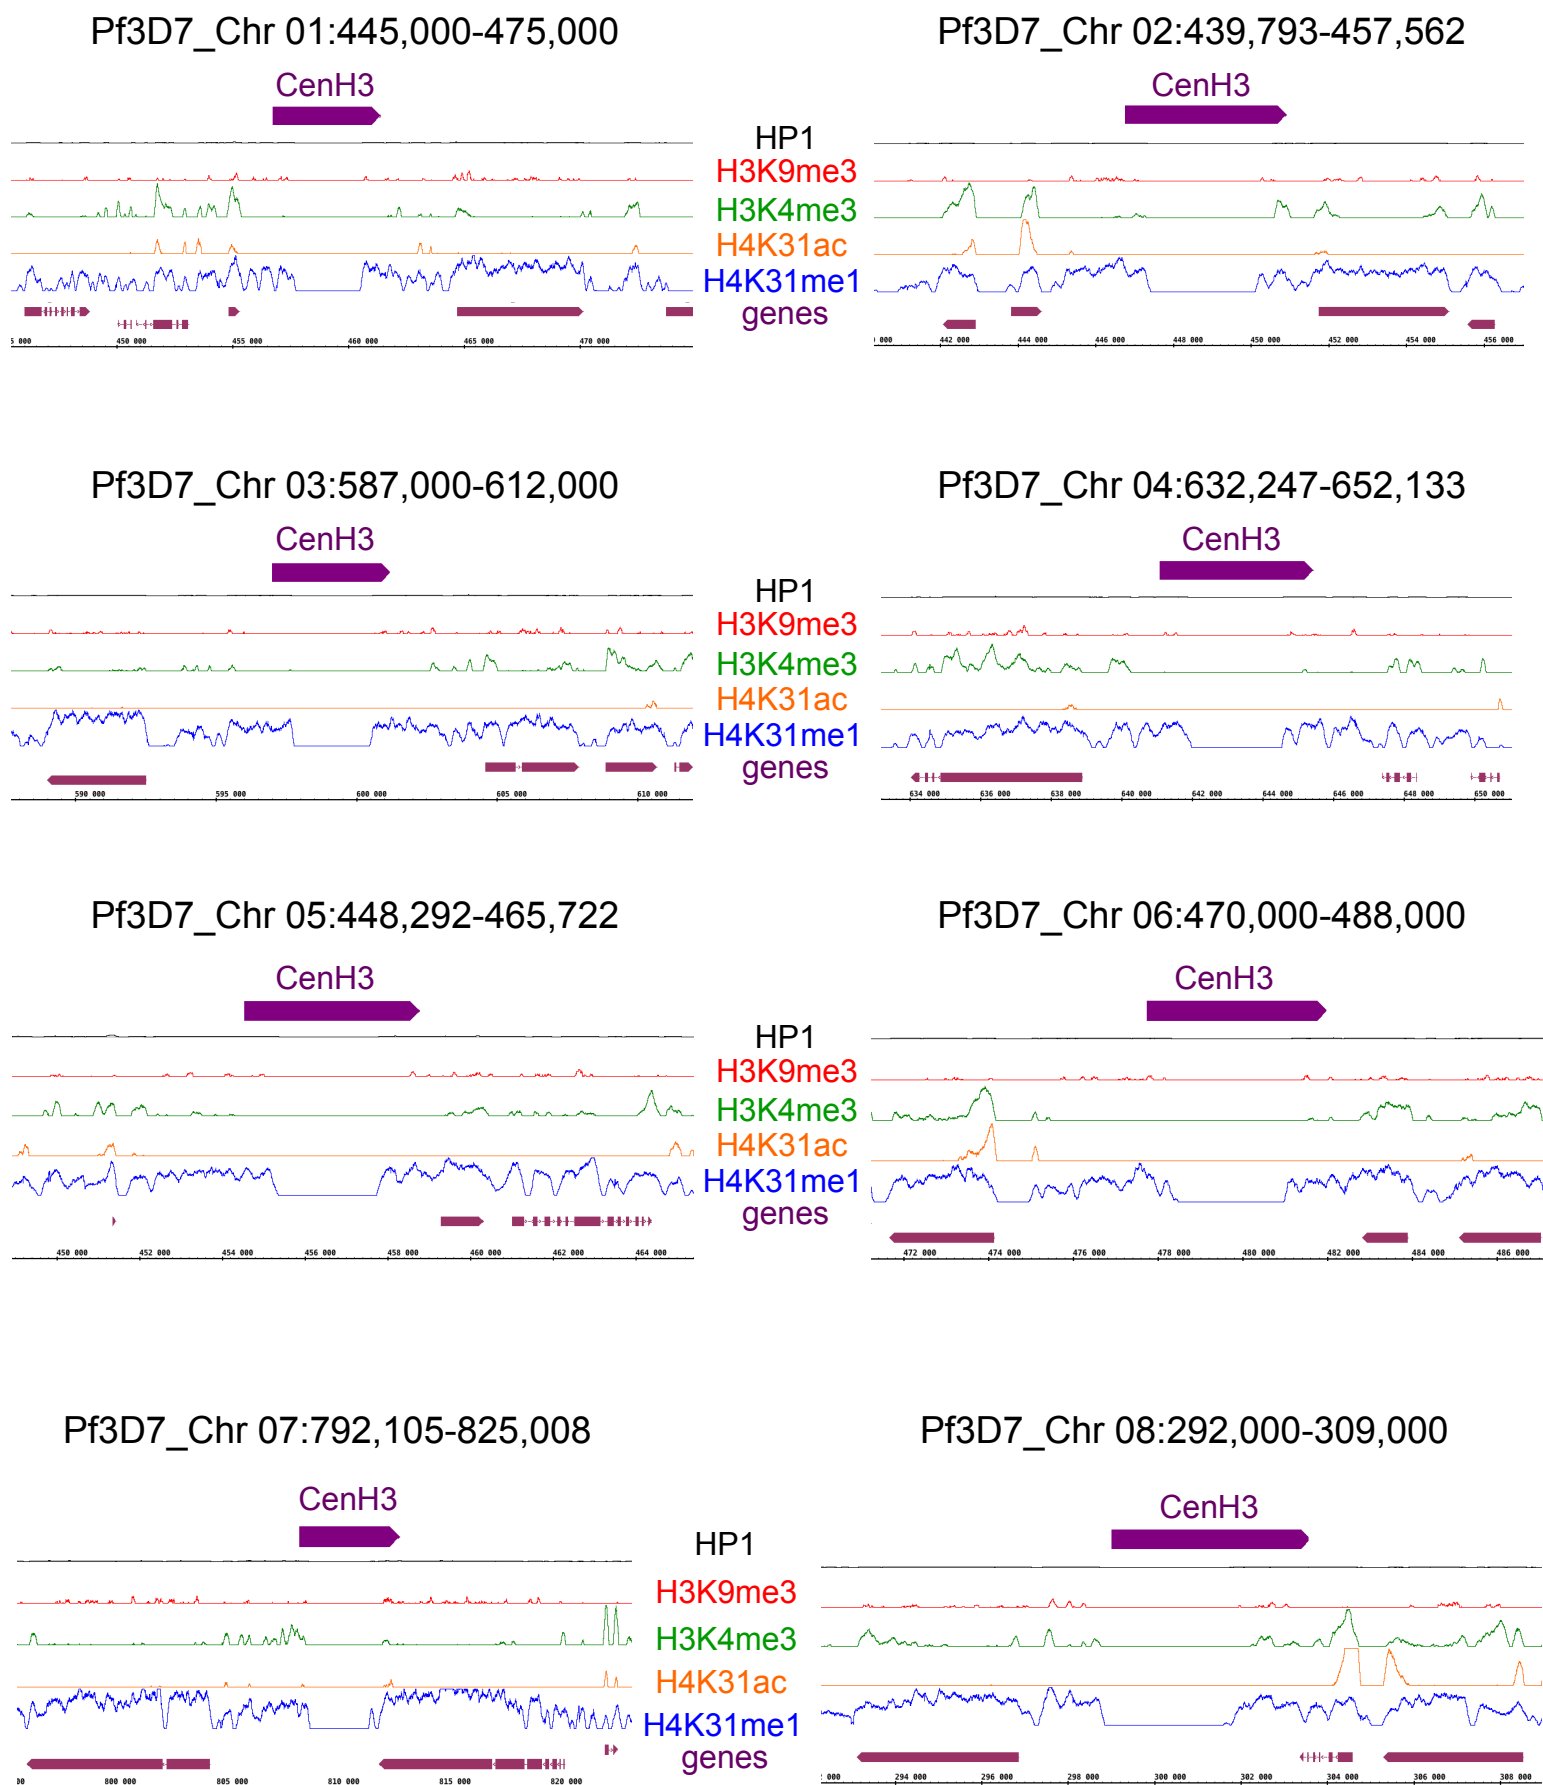

Figure 12 – figure supplement 1

Supplement: supp [file elife-29391-supp-v1.zip]

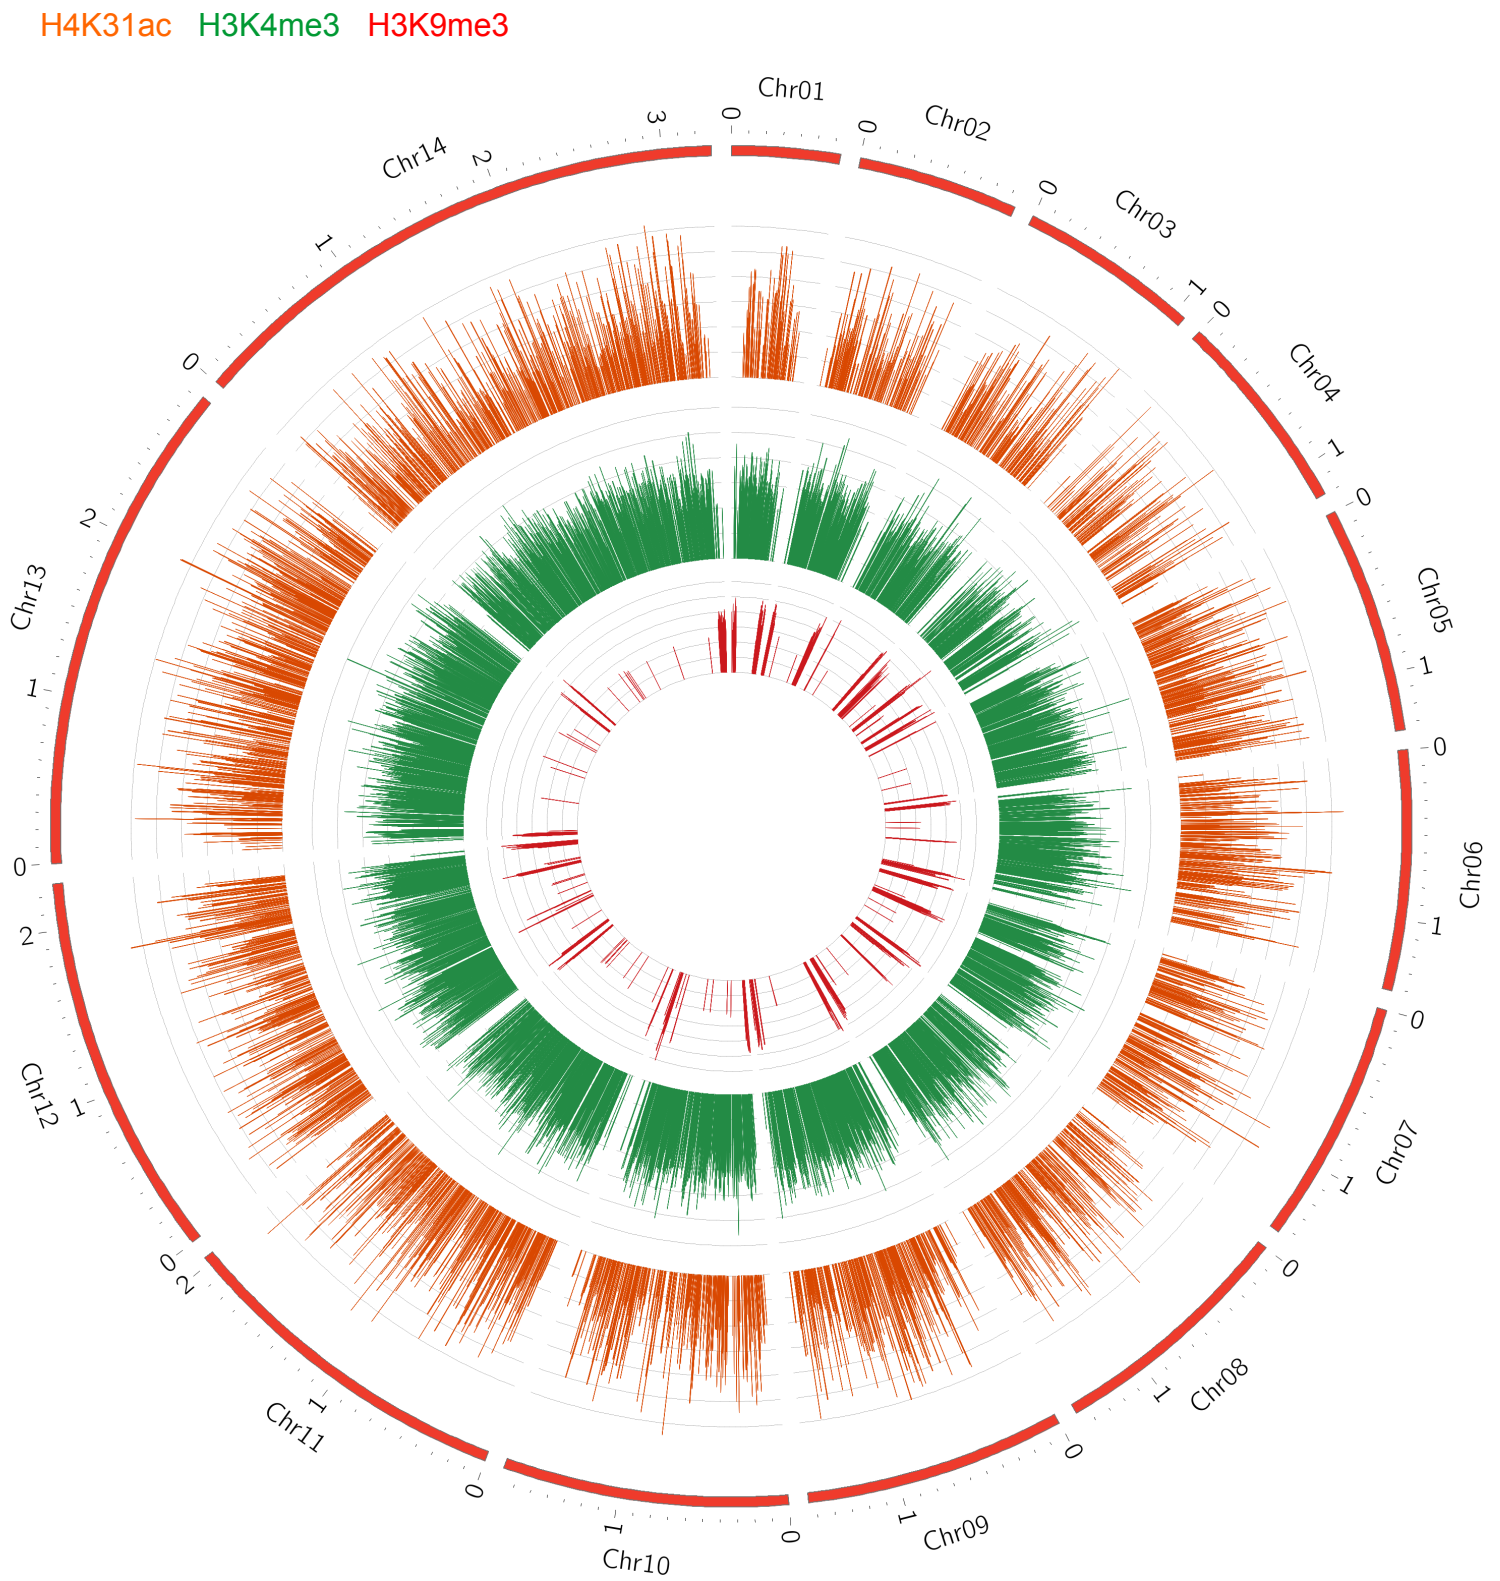

Figure 11 – figure supplement 2

Supplement: supp [file elife-29391-supp-v1.zip]

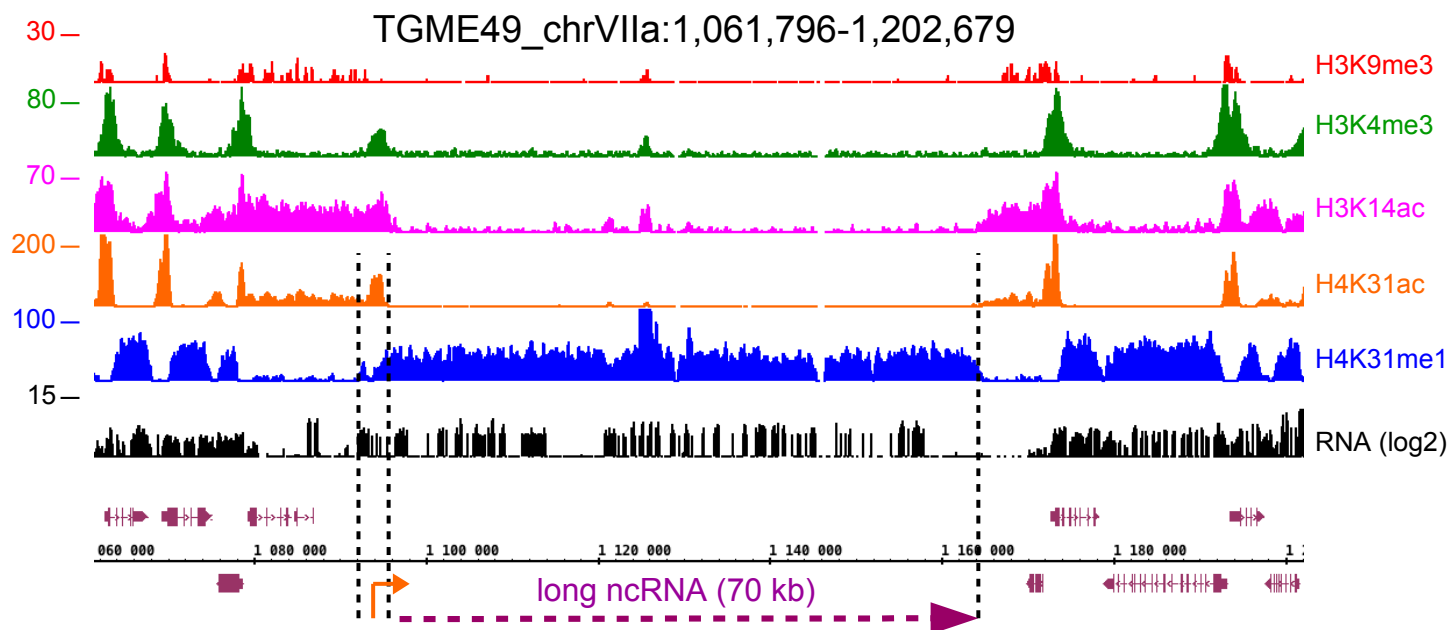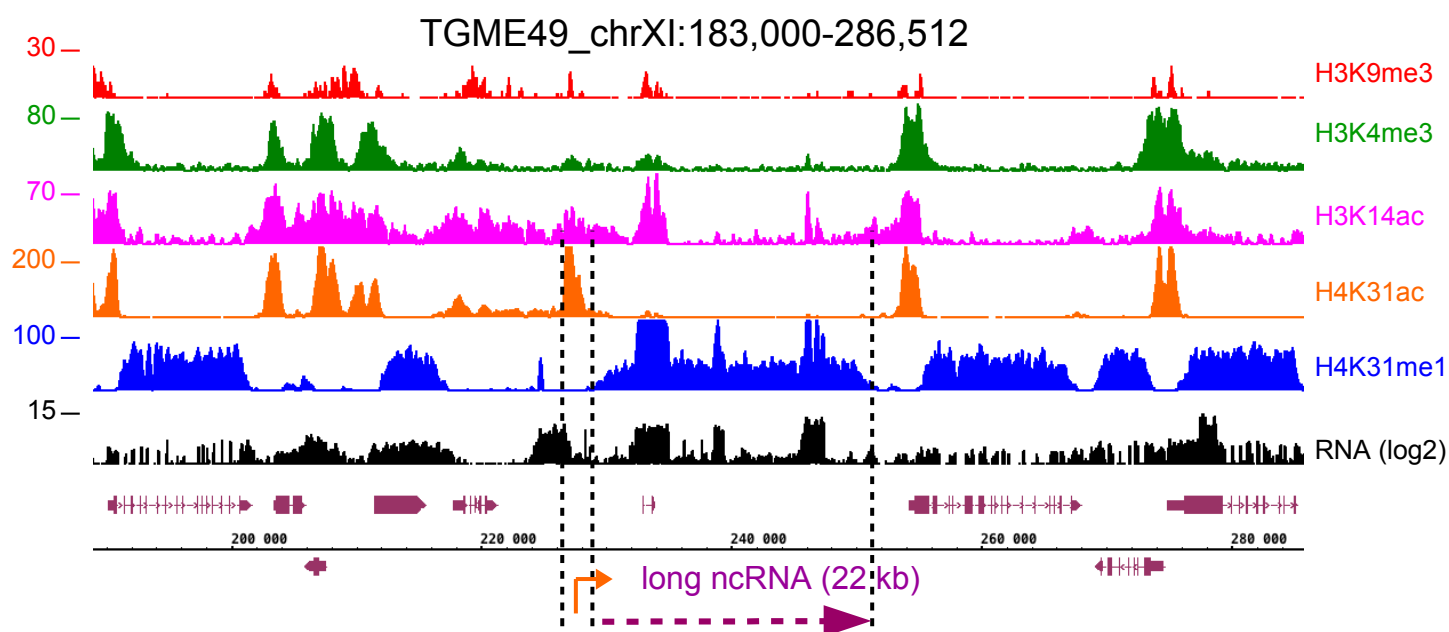

Figure 10 – figure supplement 5

Supplement: supp [file elife-29391-supp-v1.zip]

**A****Pearson correlation**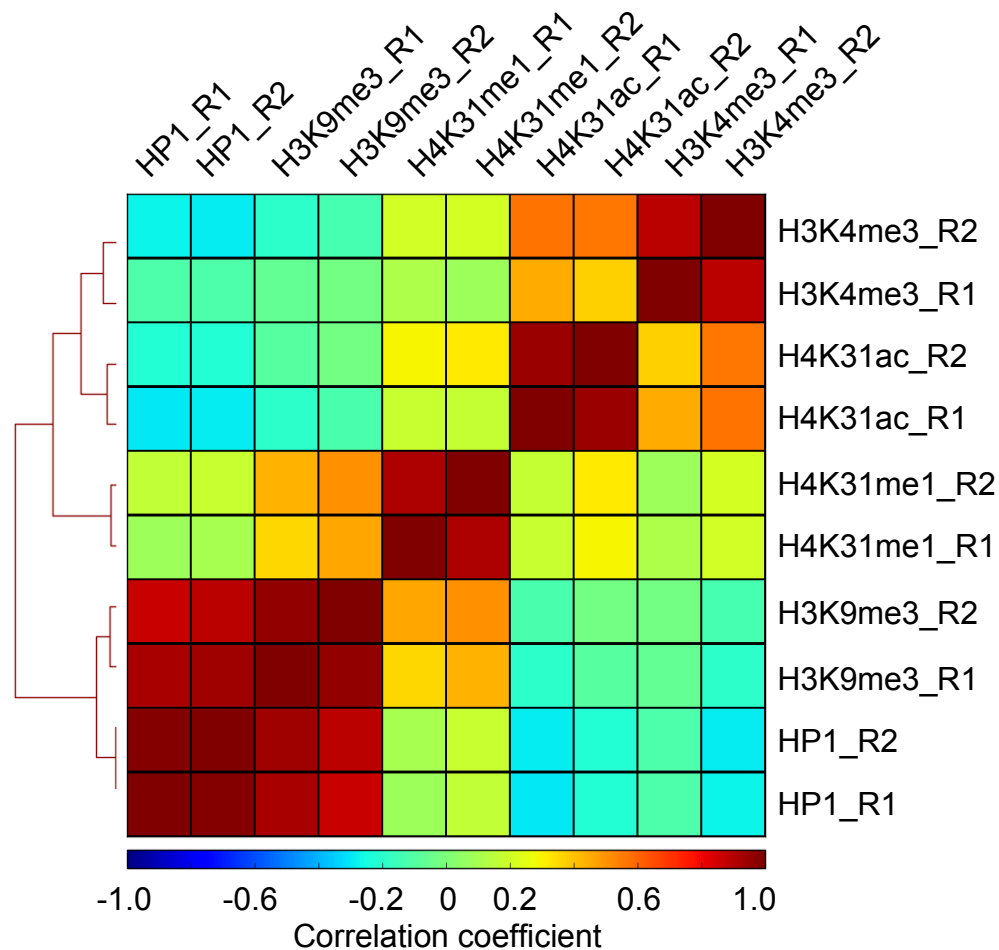**B****Spearman correlation**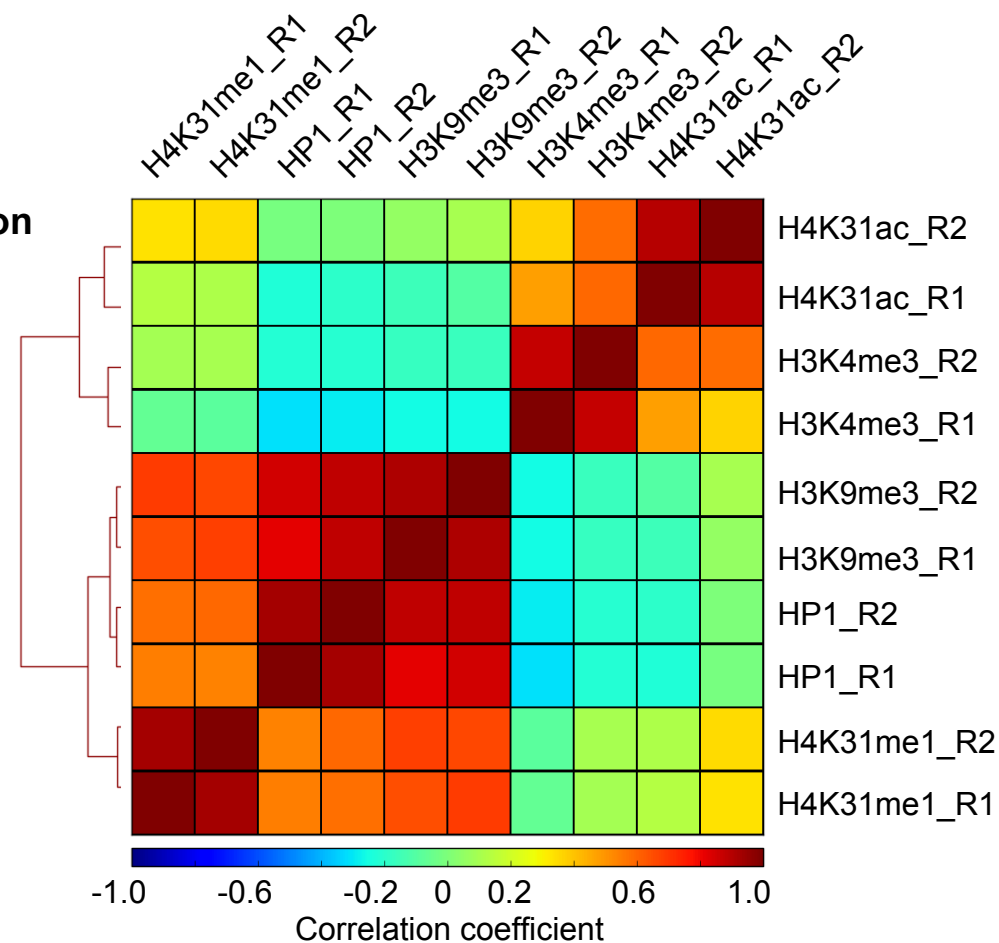**Figure 11 – figure supplement 1**

Supplement: supp [file elife-29391-supp-v1.zip]

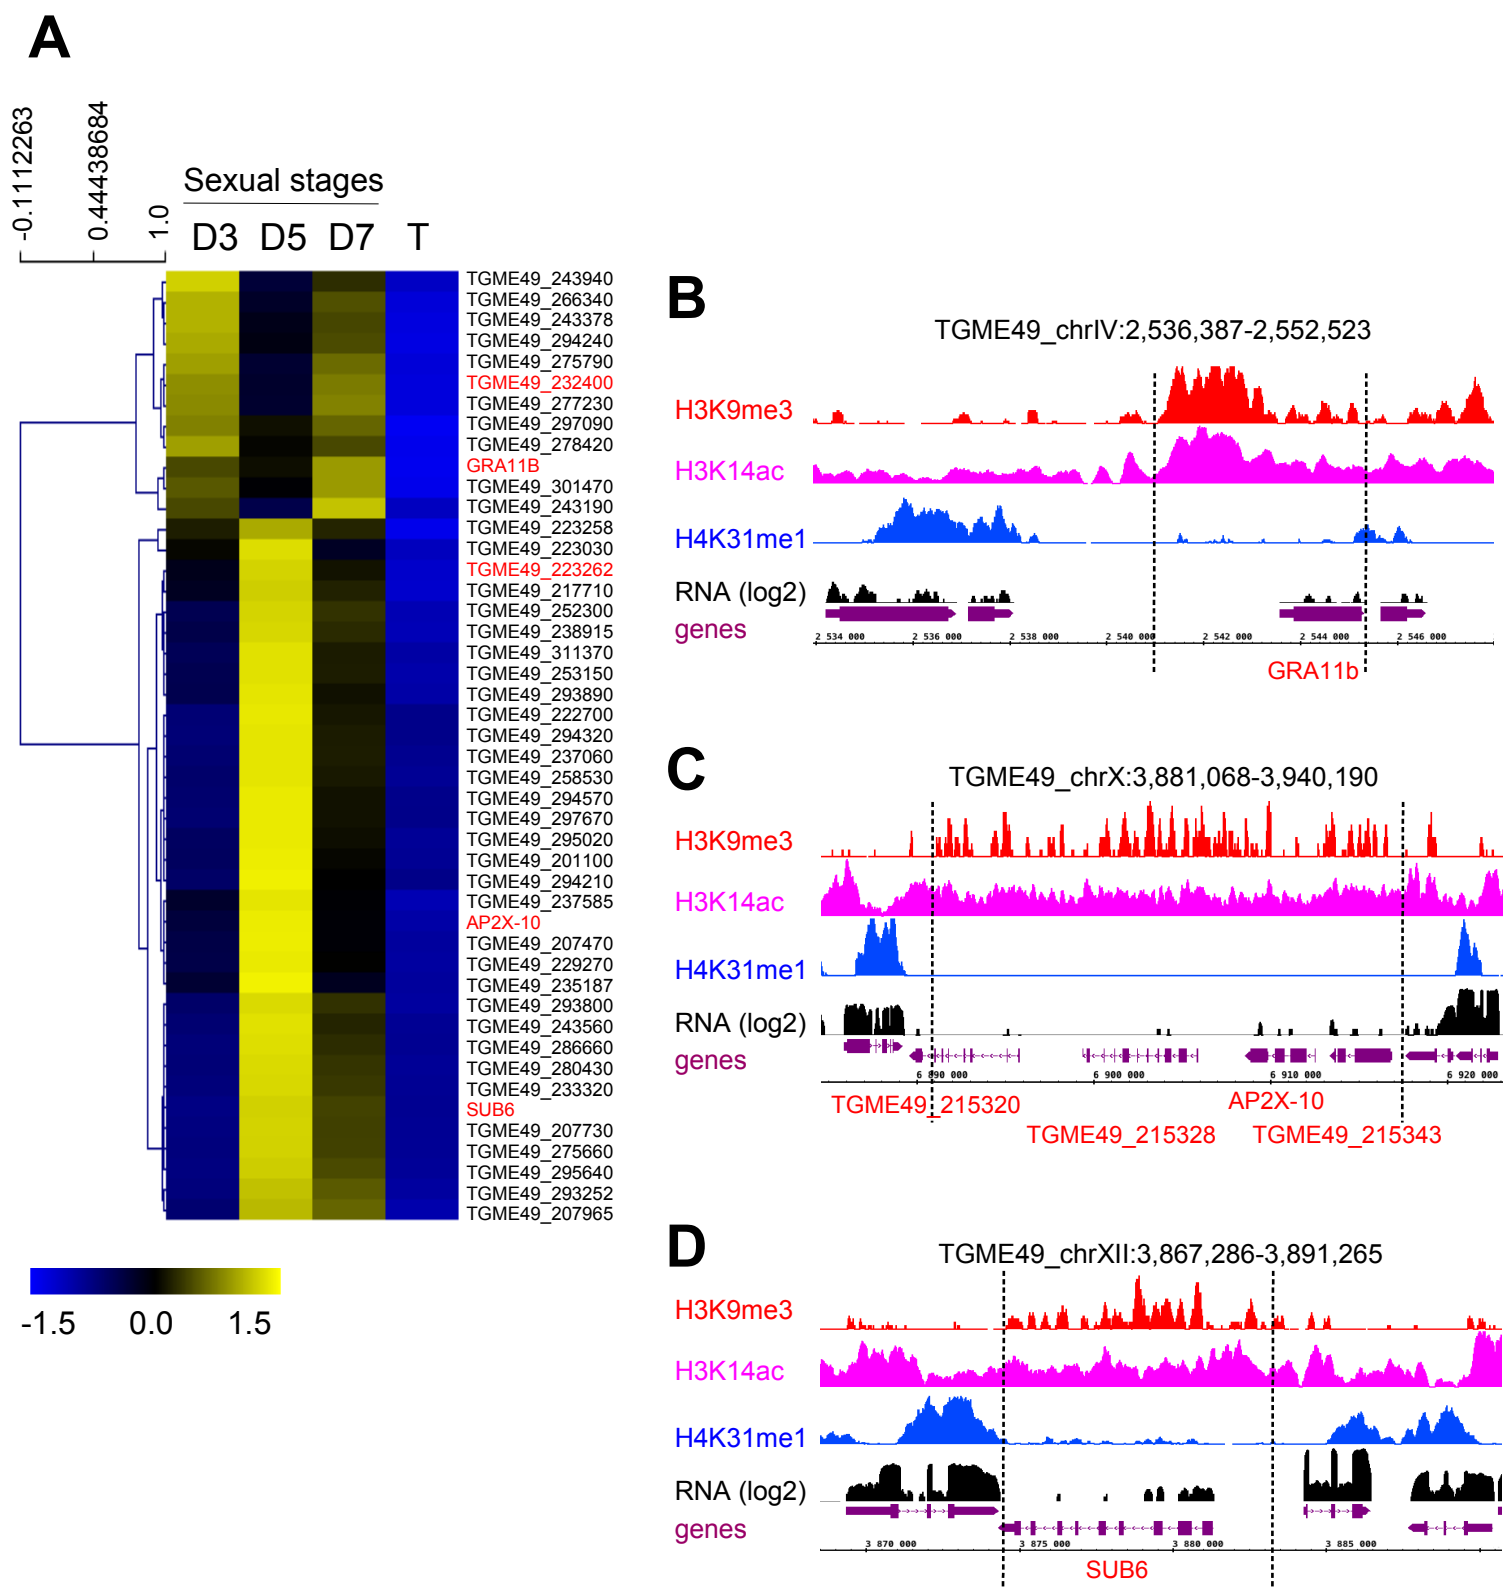

**Figure 10 – figure supplement 2**

Supplement: supp [file elife-29391-supp-v1.zip]

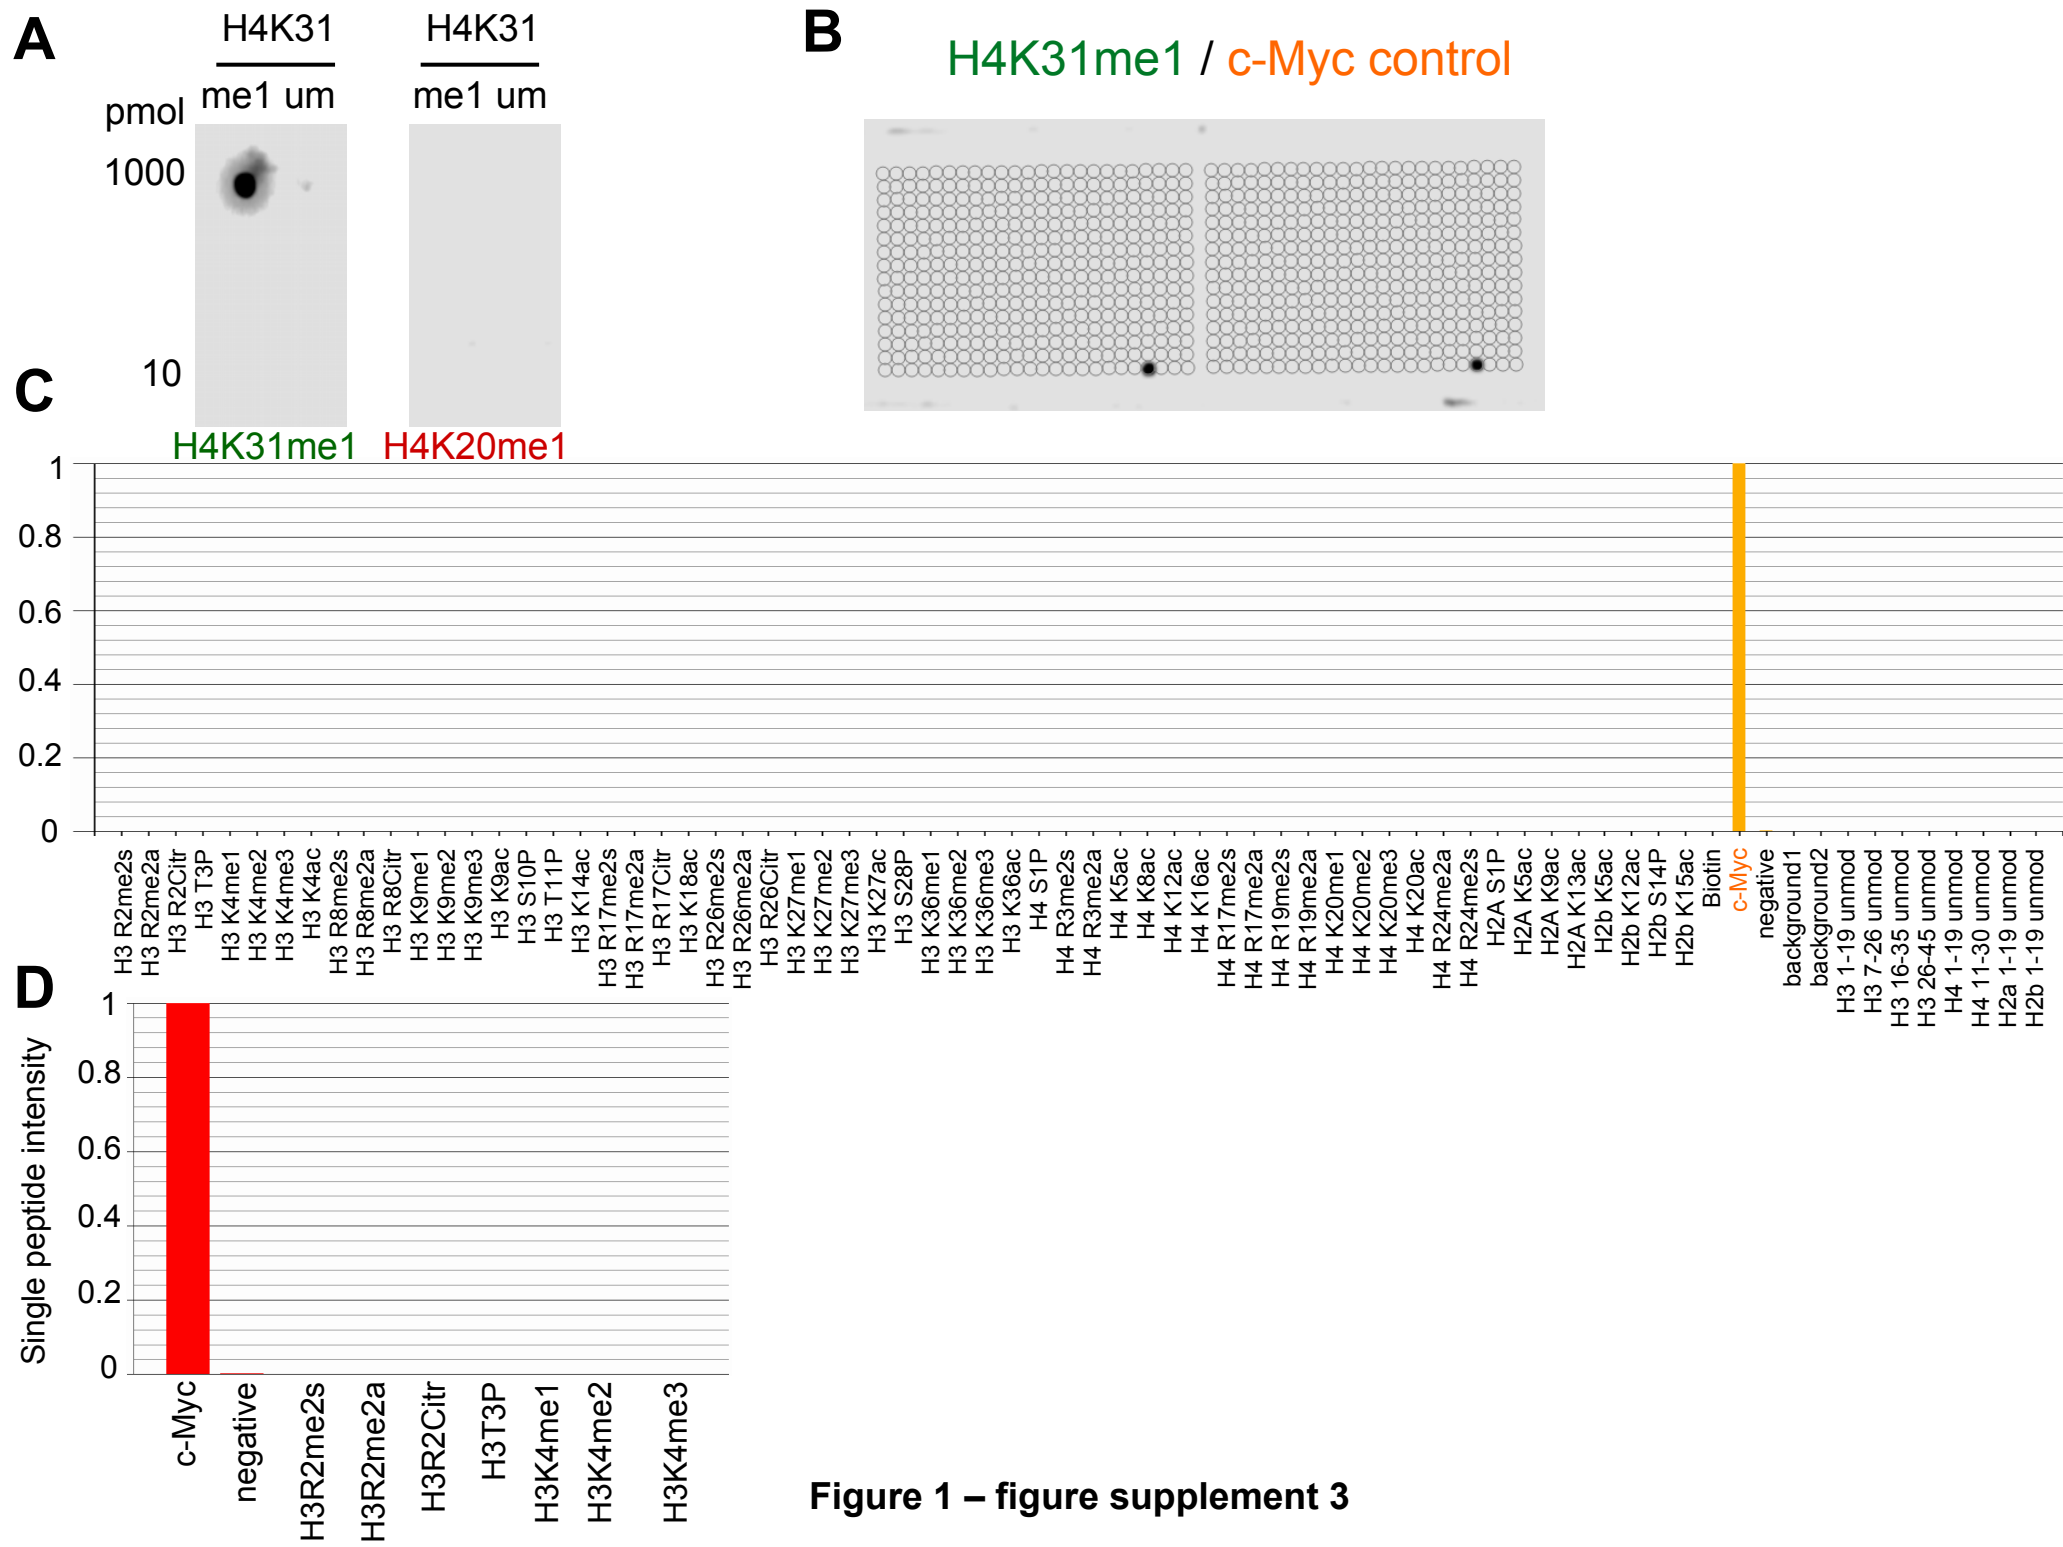

Figure 1 – figure supplement 3

Supplement: supp [file elife-29391-supp-v1.zip]

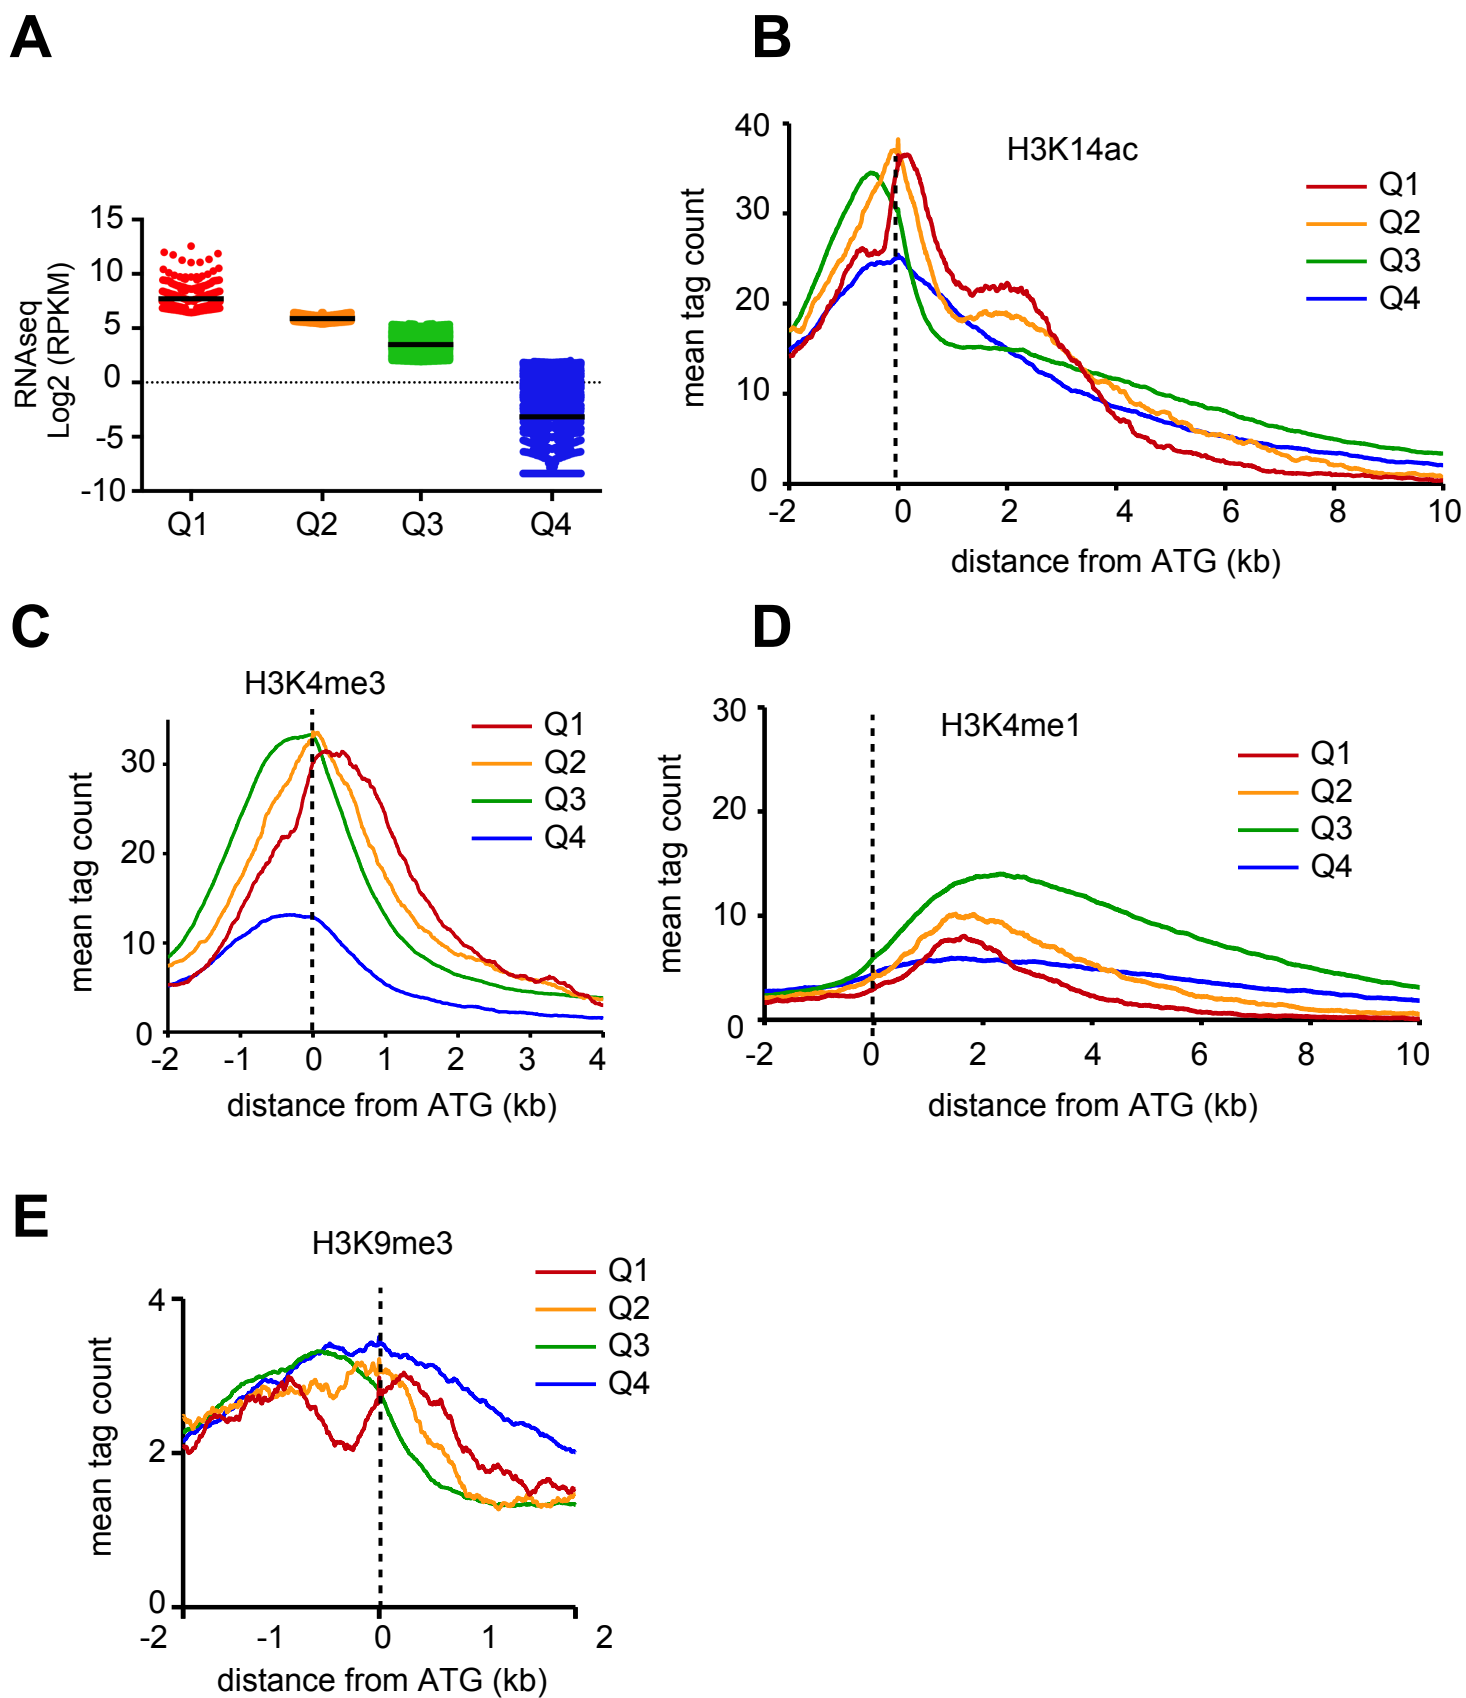

Figure 9 – figure supplement 1

Supplement: supp [file elife-29391-supp-v1.zip]

H4K20me1 (Sautel *et al.*, 2007)

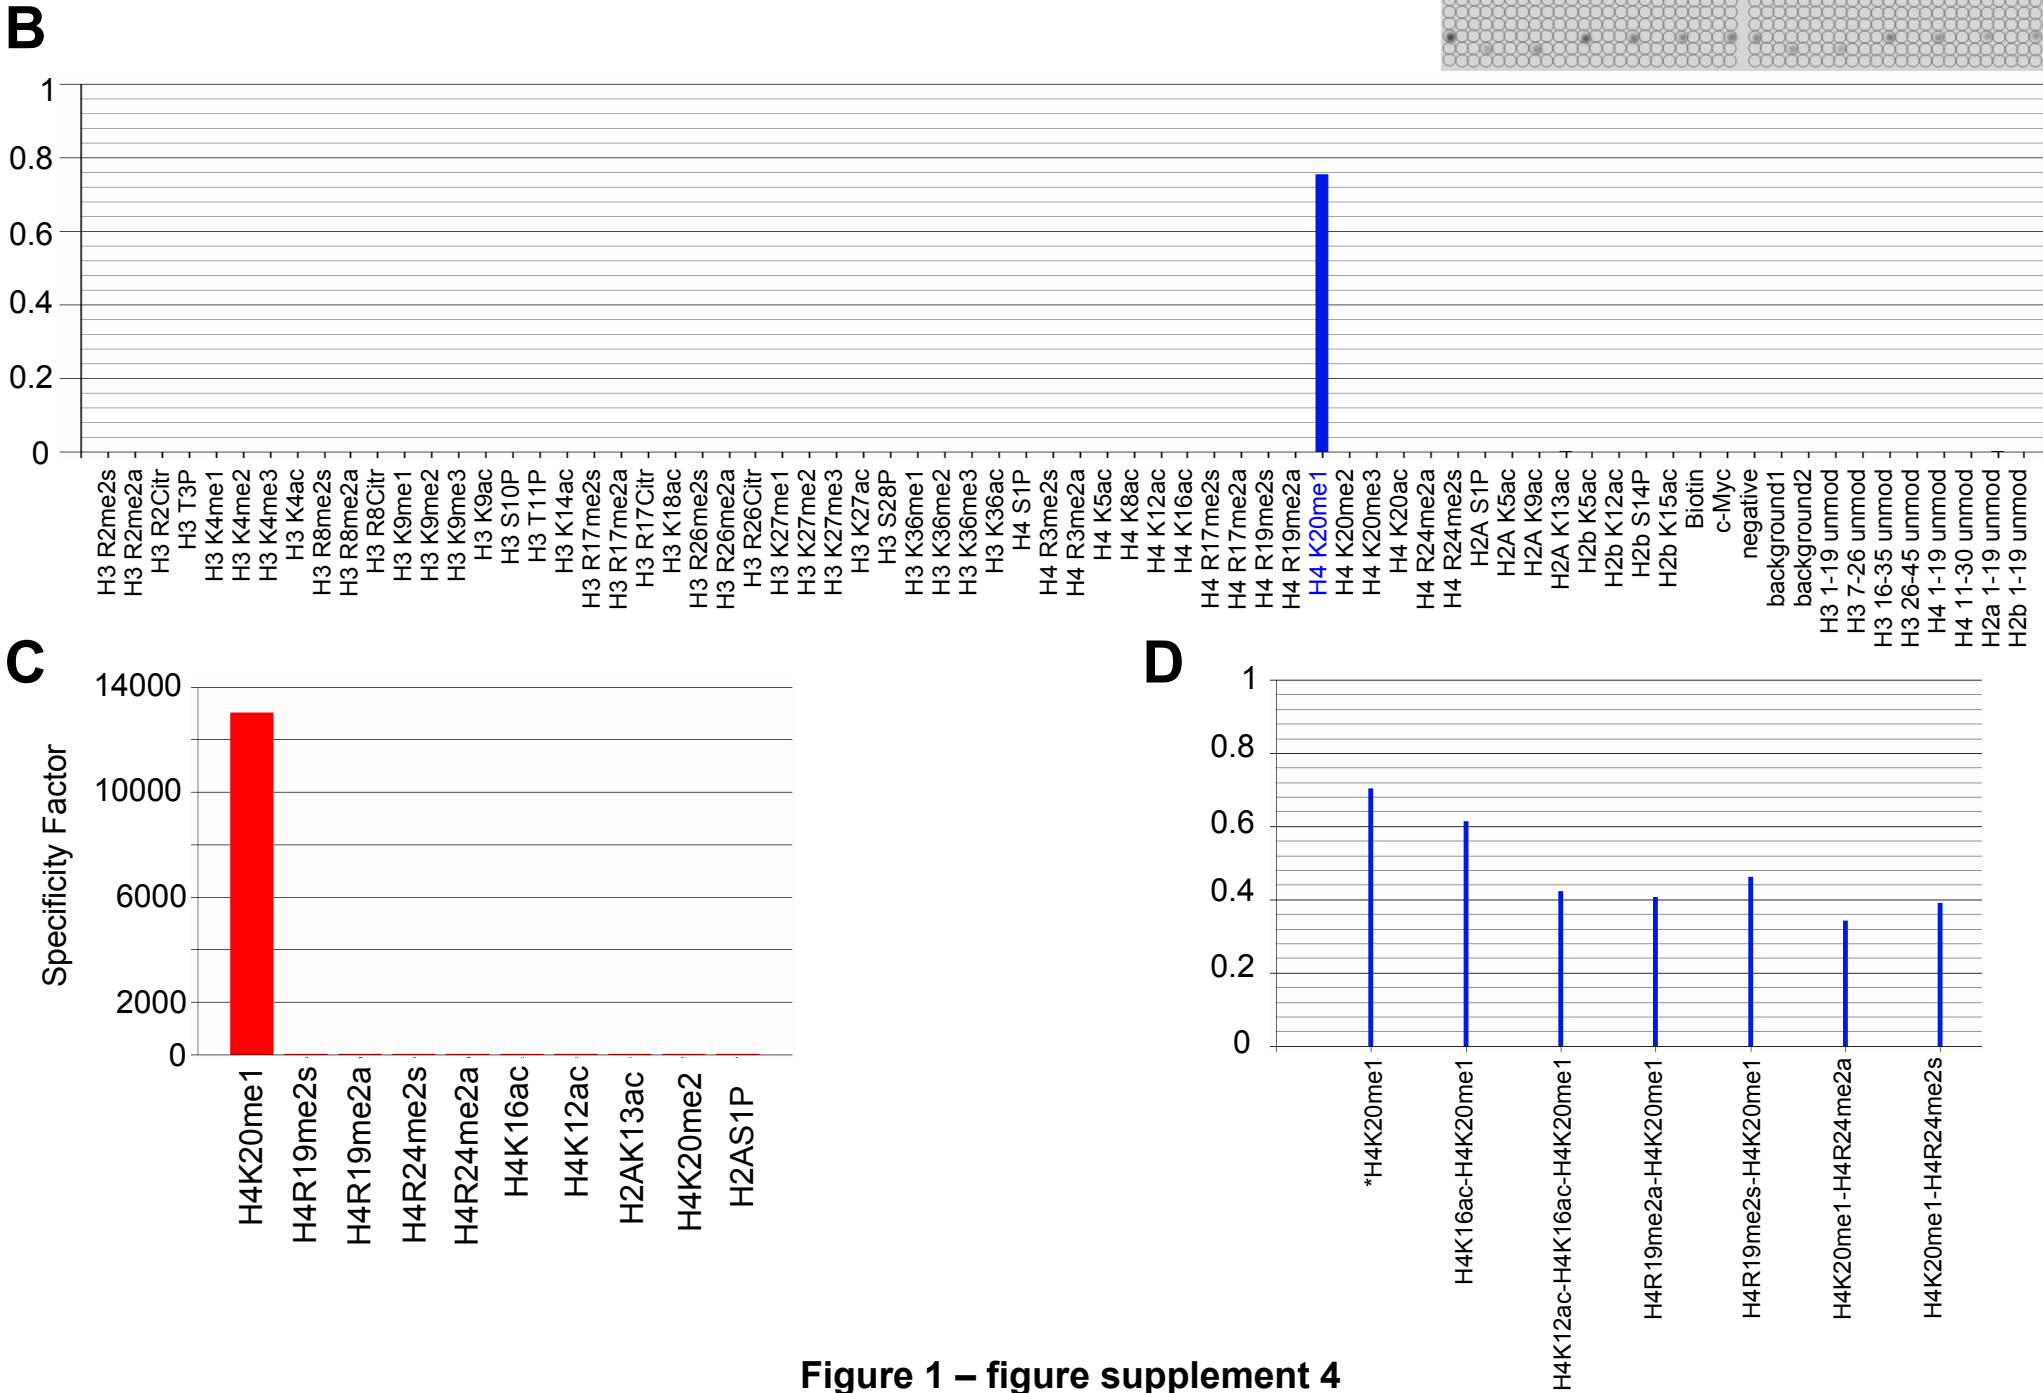

Figure 1 – figure supplement 4

Supplement: supp [file elife-29391-supp-v1.zip]

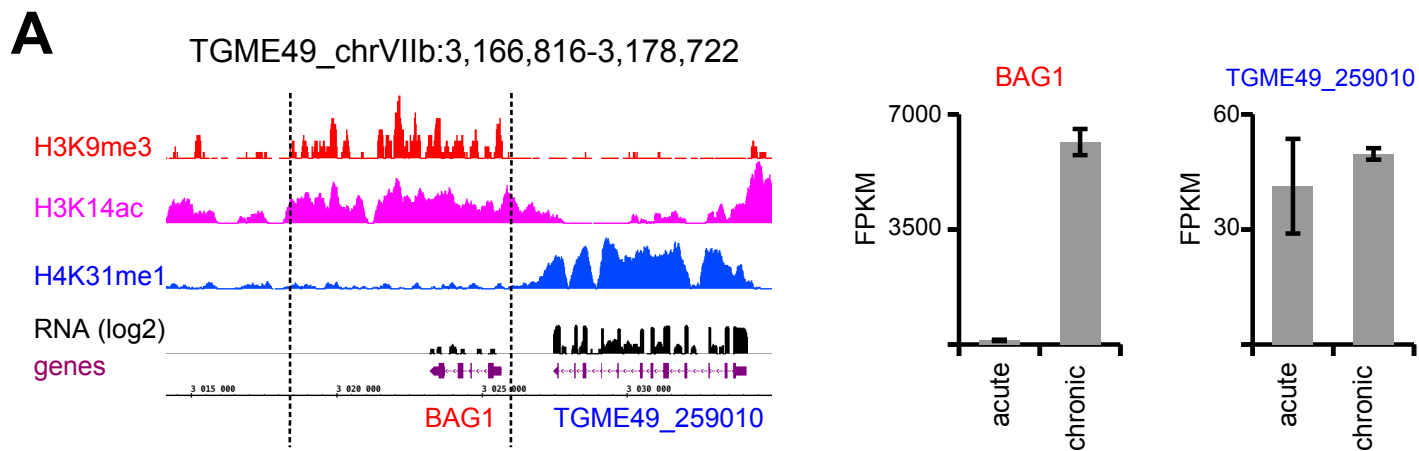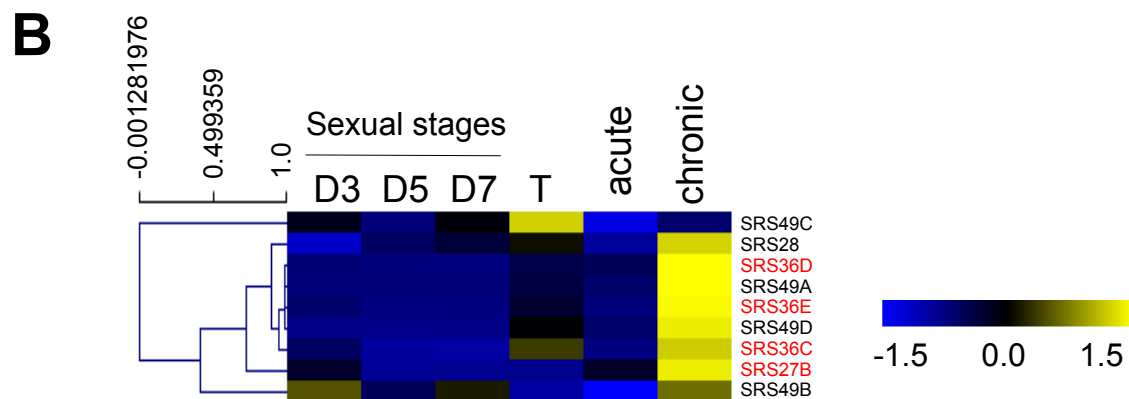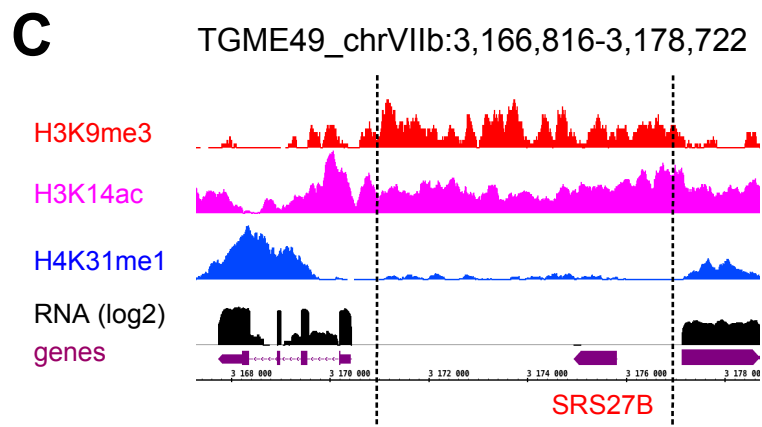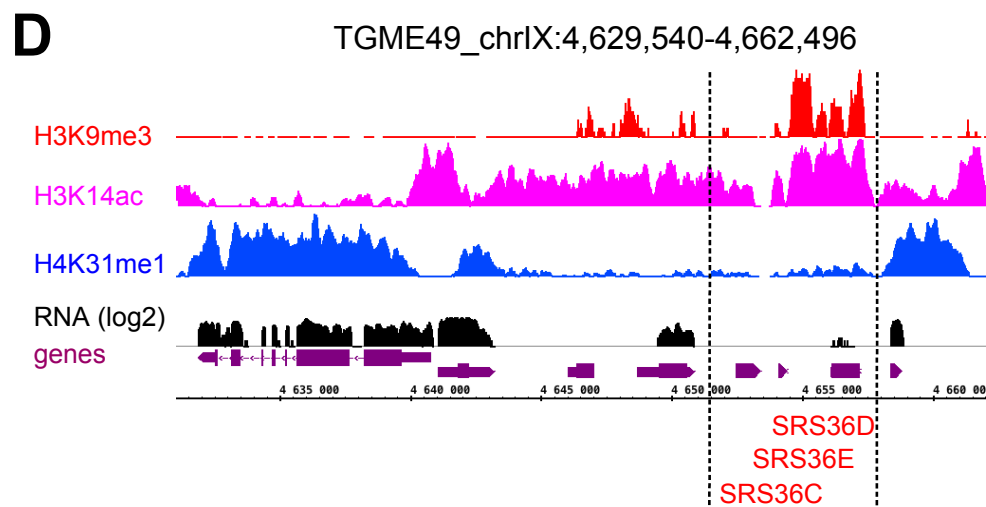

Figure 10 – figure supplement 1

Supplement: supp [file elife-29391-supp-v1.zip]

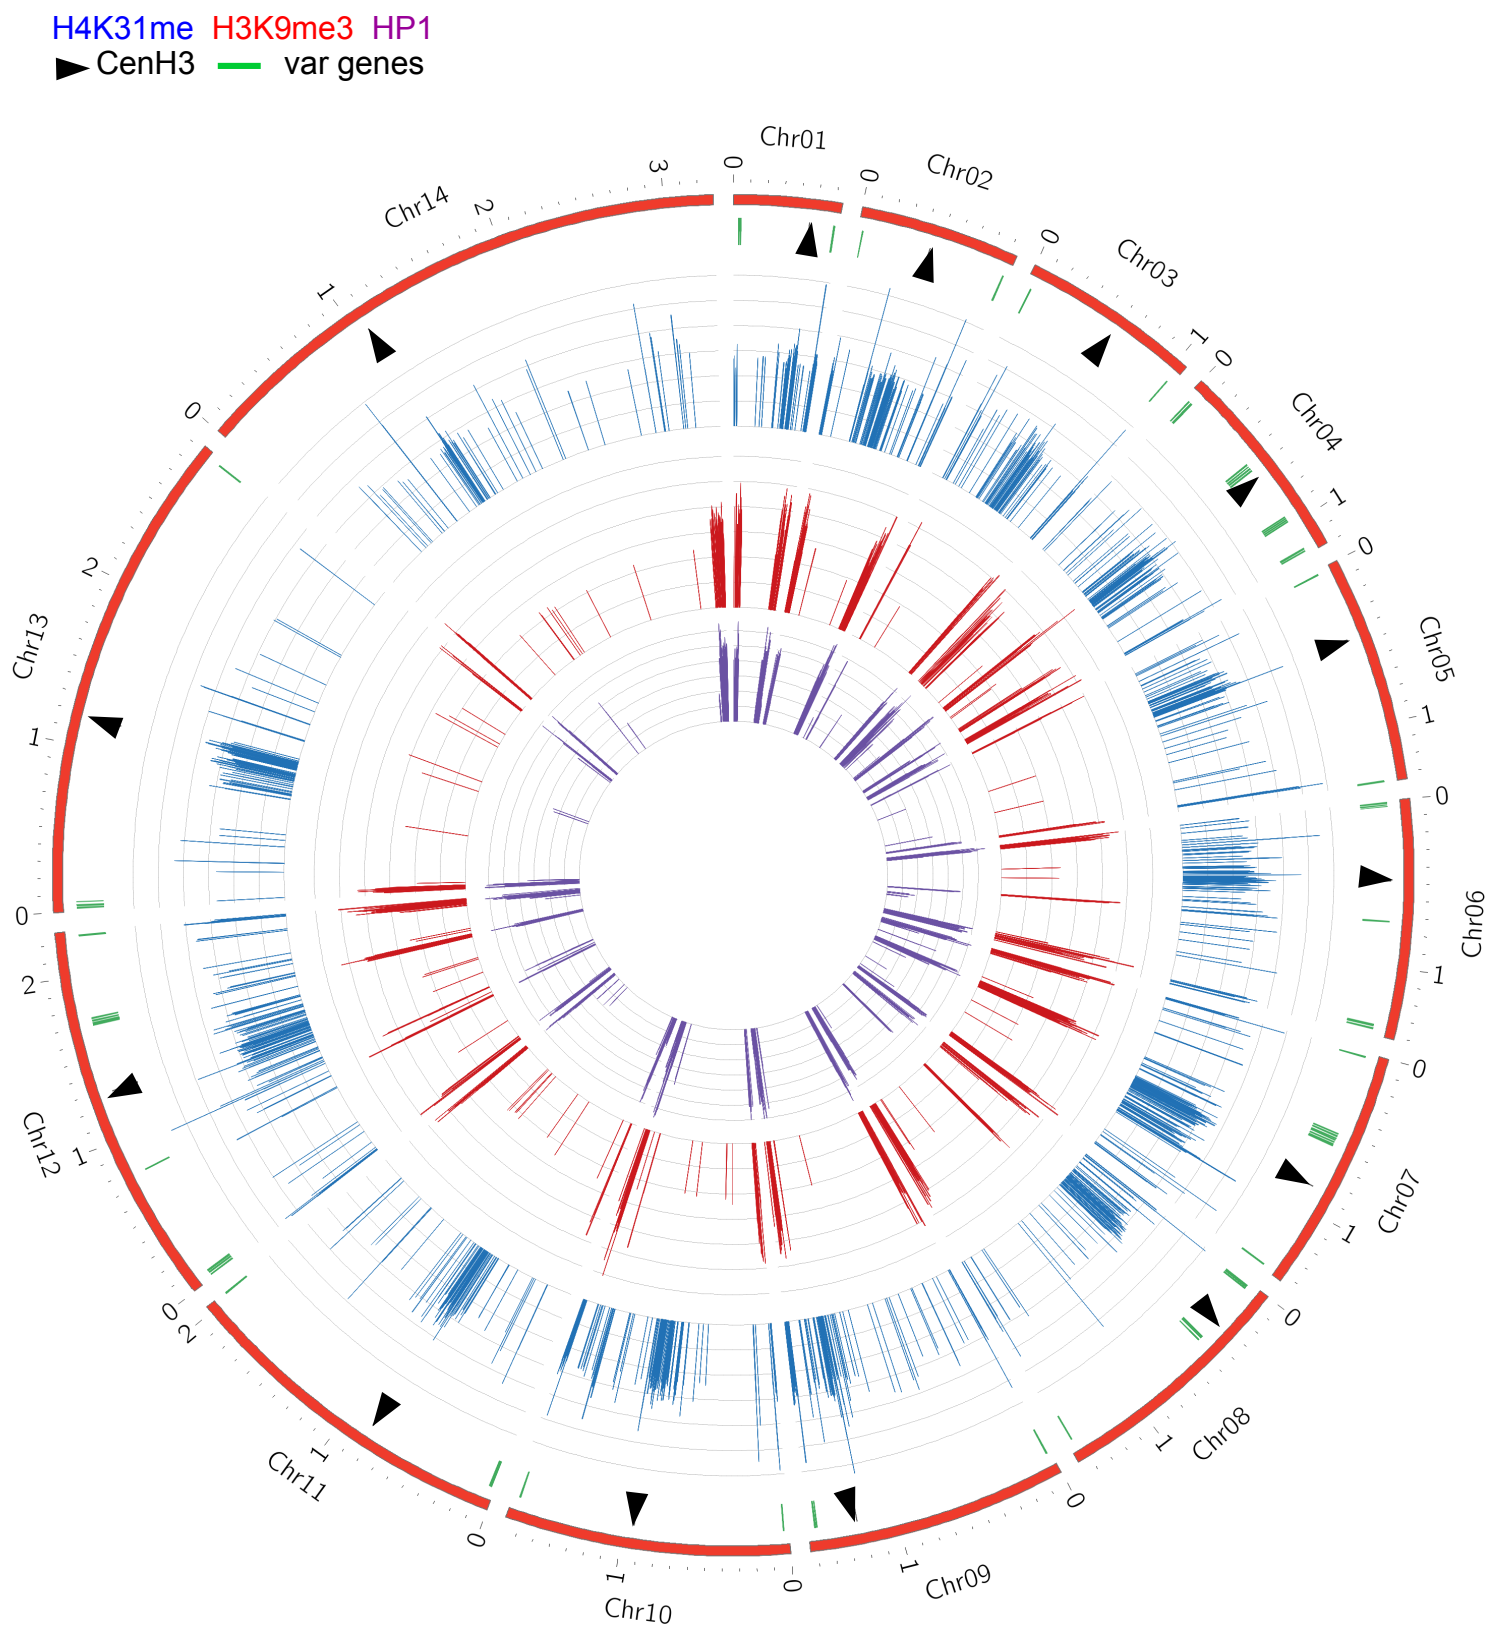

**Figure 11 – figure supplement 3**

Supplement: supp [file elife-29391-supp-v1.zip]
